# Supplementary material for: Identification of Peptide Lv, a Novel Putative Neuropeptide That Regulates the Expression of L-Type Voltage-Gated Calcium Channels in Photoreceptors
Source: PLoS One. 2012 Aug 13;7(8):e43091. doi: 10.1371/journal.pone.0043091 (PMC3418253; doi:10.1371/journal.pone.0043091)
Supplement: Data S1 — The Excel file contains the lists of genes in each screening step. Sheets 1 and 2 list the human (3550 genes; sheet 1) and mouse (3164 genes; sheet 2) genes that contain potential N-terminal signal peptide sequences and secretory signals. Uncharacterized proteins (154 from both human and mouse) are listed on sheet 3, which were subjected to screening for proprotein cleavase cutting sites, transmembrane domain, glycosylation, and homology. Candidate sequences that did not have at least 50% homology among humans, rats, and mice were eliminated, which left 80 potential genes listed on sheet 4. Among these 80 candidate genes, some were further eliminated if they contained multiple transmembrane domains or signal transmembrane domains but lacked proprotein cleavase cutting motifs. The final candidate genes are listed in sheet 5. (XLSX) [file pone.0043091.s001.xlsx]

## Sheet: Sheet1
Access Number	Species	SP status	Protein name
O60613	Homo sapiens	potential	15 kDa selenoprotein
Q7Z5P4	Homo sapiens	potential	17-beta hydroxysteroid dehydrogenase 13
Q86UL3	Homo sapiens	potential	1-acyl-sn-glycerol-3-phosphate acyltransferase zeta
Q8NCC3	Homo sapiens	confirmed	1-O-acylceramide synthase
Q15392	Homo sapiens	potential	24-dehydrocholesterol reductase
Q16880	Homo sapiens	potential	2-hydroxyacylsphingosine 1-beta-galactosyltransferase
Q06136	Homo sapiens	potential	3-ketodihydrosphingosine reductase
Q9BRK5	Homo sapiens	potential	45 kDa calcium-binding protein
P17643	Homo sapiens	confirmed	5,6-dihydroxyindole-2-carboxylic acid oxidase
P46098	Homo sapiens	potential	5-hydroxytryptamine receptor 3A
O95264	Homo sapiens	potential	5-hydroxytryptamine receptor 3B
Q8WXA8	Homo sapiens	potential	5-hydroxytryptamine receptor 3C
Q70Z44	Homo sapiens	potential	5-hydroxytryptamine receptor 3D
A5X5Y0	Homo sapiens	potential	5-hydroxytryptamine receptor 3E
P21589	Homo sapiens	confirmed	5'-nucleotidase
P08253	Homo sapiens	potential	72 kDa type IV collagenase
P11021	Homo sapiens	confirmed	78 kDa glucose-regulated protein
Q9UHI8	Homo sapiens	potential	A disintegrin and metalloproteinase with thrombospondin motifs 1
Q9H324	Homo sapiens	potential	A disintegrin and metalloproteinase with thrombospondin motifs 10
P58397	Homo sapiens	potential	A disintegrin and metalloproteinase with thrombospondin motifs 12
Q76LX8	Homo sapiens	potential	A disintegrin and metalloproteinase with thrombospondin motifs 13
Q8WXS8	Homo sapiens	potential	A disintegrin and metalloproteinase with thrombospondin motifs 14
Q8TE58	Homo sapiens	potential	A disintegrin and metalloproteinase with thrombospondin motifs 15
Q8TE57	Homo sapiens	potential	A disintegrin and metalloproteinase with thrombospondin motifs 16
Q8TE56	Homo sapiens	potential	A disintegrin and metalloproteinase with thrombospondin motifs 17
Q8TE60	Homo sapiens	potential	A disintegrin and metalloproteinase with thrombospondin motifs 18
Q8TE59	Homo sapiens	potential	A disintegrin and metalloproteinase with thrombospondin motifs 19
O95450	Homo sapiens	potential	A disintegrin and metalloproteinase with thrombospondin motifs 2
P59510	Homo sapiens	potential	A disintegrin and metalloproteinase with thrombospondin motifs 20
O15072	Homo sapiens	potential	A disintegrin and metalloproteinase with thrombospondin motifs 3
O75173	Homo sapiens	potential	A disintegrin and metalloproteinase with thrombospondin motifs 4
Q9UNA0	Homo sapiens	potential	A disintegrin and metalloproteinase with thrombospondin motifs 5
Q9UKP5	Homo sapiens	potential	A disintegrin and metalloproteinase with thrombospondin motifs 6
Q9UKP4	Homo sapiens	potential	A disintegrin and metalloproteinase with thrombospondin motifs 7
Q9UP79	Homo sapiens	potential	A disintegrin and metalloproteinase with thrombospondin motifs 8
Q9P2N4	Homo sapiens	potential	A disintegrin and metalloproteinase with thrombospondin motifs 9
Q9H6B9	Homo sapiens	potential	Abhydrolase domain-containing protein 9
Q96GS6	Homo sapiens	potential	Abhydrolase domain-containing protein FAM108A1
Q5RGM9	Homo sapiens	potential	Abhydrolase domain-containing protein FAM108A2/A3
Q5VST6	Homo sapiens	potential	Abhydrolase domain-containing protein FAM108B1
Q6UXT9	Homo sapiens	potential	Abhydrolase domain-containing protein UNQ6510/PRO21435
P02708	Homo sapiens	confirmed	Acetylcholine receptor subunit alpha
P11230	Homo sapiens	confirmed	Acetylcholine receptor subunit beta
Q07001	Homo sapiens	by similarity	Acetylcholine receptor subunit delta
Q04844	Homo sapiens	confirmed	Acetylcholine receptor subunit epsilon
P07510	Homo sapiens	potential	Acetylcholine receptor subunit gamma
P22303	Homo sapiens	potential	Acetylcholinesterase
Q9Y215	Homo sapiens	potential	Acetylcholinesterase collagenic tail peptide
Q13510	Homo sapiens	potential	Acid ceramidase
Q8TE99	Homo sapiens	potential	Acid phosphatase-like protein 2
Q92484	Homo sapiens	potential	Acid sphingomyelinase-like phosphodiesterase 3a
Q92485	Homo sapiens	potential	Acid sphingomyelinase-like phosphodiesterase 3b
Q9BZP6	Homo sapiens	by similarity	Acidic mammalian chitinase
P10323	Homo sapiens	confirmed	Acrosin
Q8NEB7	Homo sapiens	potential	Acrosin-binding protein
P26436	Homo sapiens	potential	Acrosomal protein SP-10
Q9NQ60	Homo sapiens	potential	Acrosome formation-associated factor
Q9C0K3	Homo sapiens	potential	Actin-related protein 11
Q04771	Homo sapiens	by similarity	Activin receptor type-1
P36896	Homo sapiens	potential	Activin receptor type-1B
Q8NER5	Homo sapiens	potential	Activin receptor type-1C
P27037	Homo sapiens	potential	Activin receptor type-2A
Q13705	Homo sapiens	potential	Activin receptor type-2B
P28039	Homo sapiens	potential	Acyloxyacyl hydrolase
O14672	Homo sapiens	potential	ADAM 10
O75078	Homo sapiens	potential	ADAM 11
O43184	Homo sapiens	potential	ADAM 12
Q13444	Homo sapiens	potential	ADAM 15
P78536	Homo sapiens	potential	ADAM 17
Q9Y3Q7	Homo sapiens	potential	ADAM 18
Q9H013	Homo sapiens	potential	ADAM 19
O43506	Homo sapiens	potential	ADAM 20
Q9UKJ8	Homo sapiens	potential	ADAM 21
Q9P0K1	Homo sapiens	potential	ADAM 22
O75077	Homo sapiens	potential	ADAM 23
Q9UKQ2	Homo sapiens	potential	ADAM 28
Q9UKF5	Homo sapiens	potential	ADAM 29
Q9UKF2	Homo sapiens	potential	ADAM 30
Q8TC27	Homo sapiens	confirmed	ADAM 32
Q9BZ11	Homo sapiens	potential	ADAM 33
P78325	Homo sapiens	potential	ADAM 8
Q13443	Homo sapiens	potential	ADAM 9
O15204	Homo sapiens	potential	ADAM DEC1
Q8N6G6	Homo sapiens	confirmed	ADAMTS-like protein 1
Q8N6G6	Homo sapiens	potential	ADAMTS-like protein 1
Q86TH1	Homo sapiens	potential	ADAMTS-like protein 2
P82987	Homo sapiens	potential	ADAMTS-like protein 3
Q6UY14	Homo sapiens	potential	ADAMTS-like protein 4
Q6ZMM2	Homo sapiens	potential	ADAMTS-like protein 5
Q9H6B4	Homo sapiens	potential	Adipocyte adhesion molecule
Q8IUX7	Homo sapiens	potential	Adipocyte enhancer-binding protein 1
Q15848	Homo sapiens	confirmed	Adiponectin
P35318	Homo sapiens	confirmed	ADM
Q7Z4H4	Homo sapiens	potential	ADM2
Q9BRR6	Homo sapiens	potential	ADP-dependent glucokinase
Q10588	Homo sapiens	potential	ADP-ribosyl cyclase 2
Q15109	Homo sapiens	potential	Advanced glycosylation end product-specific receptor
Q15109	Homo sapiens	confirmed	Advanced glycosylation end product-specific receptor
P43652	Homo sapiens	potential	Afamin
P16112	Homo sapiens	confirmed	Aggrecan core protein
O00253	Homo sapiens	potential	Agouti-related protein
P42127	Homo sapiens	potential	Agouti-signaling protein
O00468	Homo sapiens	potential	Agrin
Q9UM73	Homo sapiens	potential	ALK tyrosine kinase receptor
P05187	Homo sapiens	confirmed	Alkaline phosphatase, placental type
P10696	Homo sapiens	potential	Alkaline phosphatase, placental-like
P05186	Homo sapiens	confirmed	Alkaline phosphatase, tissue-nonspecific isozyme
Q9BT30	Homo sapiens	potential	Alkylated DNA repair protein alkB homolog 7
Q6NUM9	Homo sapiens	potential	All-trans-retinol 13,14-reductase
Q5T0B8	Homo sapiens	potential	Alpha 1,3-galactosyltransferase 2
P02763	Homo sapiens	confirmed	Alpha-1-acid glycoprotein 1
P19652	Homo sapiens	confirmed	Alpha-1-acid glycoprotein 2
P01011	Homo sapiens	confirmed	Alpha-1-antichymotrypsin
P01009	Homo sapiens	confirmed	Alpha-1-antitrypsin
P04217	Homo sapiens	confirmed	Alpha-1B-glycoprotein
P08697	Homo sapiens	confirmed	Alpha-2-antiplasmin
P02765	Homo sapiens	confirmed	Alpha-2-HS-glycoprotein
P01023	Homo sapiens	confirmed	Alpha-2-macroglobulin
P30533	Homo sapiens	potential	Alpha-2-macroglobulin receptor-associated protein
A8K2U0	Homo sapiens	potential	Alpha-2-macroglobulin-like protein 1
P04745	Homo sapiens	potential	Alpha-amylase 1
P19961	Homo sapiens	confirmed	Alpha-amylase 2B
P02771	Homo sapiens	confirmed	Alpha-fetoprotein
P06280	Homo sapiens	confirmed	Alpha-galactosidase A
P00709	Homo sapiens	confirmed	Alpha-lactalbumin
P35475	Homo sapiens	potential	Alpha-L-iduronidase
P17050	Homo sapiens	confirmed	Alpha-N-acetylgalactosaminidase
P54802	Homo sapiens	confirmed	Alpha-N-acetylglucosaminidase
P47710	Homo sapiens	confirmed	Alpha-S1-casein
Q16586	Homo sapiens	potential	Alpha-sarcoglycan
O75443	Homo sapiens	potential	Alpha-tectorin
P16234	Homo sapiens	confirmed	Alpha-type platelet-derived growth factor receptor
Q9NP70	Homo sapiens	potential	Ameloblastin
Q546D7	Homo sapiens	potential	Ameloblastin
Q99217	Homo sapiens	confirmed	Amelogenin, X isoform
Q99218	Homo sapiens	by similarity	Amelogenin, Y isoform
Q6UX39	Homo sapiens	confirmed	Amelotin
P19801	Homo sapiens	confirmed	Amiloride-sensitive amine oxidase [copper-containing]
P15514	Homo sapiens	potential	Amphiregulin
Q86WK6	Homo sapiens	potential	Amphoterin-induced protein 1
Q86SJ2	Homo sapiens	potential	Amphoterin-induced protein 2
Q86WK7	Homo sapiens	potential	Amphoterin-induced protein 3
P05067	Homo sapiens	confirmed	Amyloid beta A4 protein
P51693	Homo sapiens	potential	Amyloid-like protein 1
Q06481	Homo sapiens	potential	Amyloid-like protein 2
P03950	Homo sapiens	confirmed	Angiogenin
Q15389	Homo sapiens	potential	Angiopoietin-1
Q02763	Homo sapiens	confirmed	Angiopoietin-1 receptor
O15123	Homo sapiens	potential	Angiopoietin-2
Q9Y264	Homo sapiens	potential	Angiopoietin-4
O95841	Homo sapiens	potential	Angiopoietin-related protein 1
Q9UKU9	Homo sapiens	potential	Angiopoietin-related protein 2
Q9Y5C1	Homo sapiens	confirmed	Angiopoietin-related protein 3
Q9BY76	Homo sapiens	potential	Angiopoietin-related protein 4
Q86XS5	Homo sapiens	potential	Angiopoietin-related protein 5
Q8NI99	Homo sapiens	potential	Angiopoietin-related protein 6
O43827	Homo sapiens	confirmed	Angiopoietin-related protein 7
P12821	Homo sapiens	confirmed	Angiotensin-converting enzyme
Q9BYF1	Homo sapiens	potential	Angiotensin-converting enzyme 2
P01019	Homo sapiens	confirmed	Angiotensinogen
Q495B1	Homo sapiens	potential	Ankyrin repeat and death domain-containing protein 1A
Q2M3V2	Homo sapiens	potential	Ankyrin repeat domain-containing protein 43
Q9BZ19	Homo sapiens	potential	Ankyrin repeat domain-containing protein 60
P23352	Homo sapiens	potential	Anosmin-1
O95994	Homo sapiens	confirmed	Anterior gradient protein 2 homolog
Q8TD06	Homo sapiens	confirmed	Anterior gradient protein 3 homolog
Q9H6X2	Homo sapiens	potential	Anthrax toxin receptor 1
P58335	Homo sapiens	potential	Anthrax toxin receptor 2
A6NF34	Homo sapiens	potential	Anthrax toxin receptor-like
P03973	Homo sapiens	confirmed	Antileukoproteinase
Q16671	Homo sapiens	potential	Anti-Muellerian hormone type-2 receptor
Q5EFE5	Homo sapiens	potential	Anti-RhD monoclonal T125 gamma1 heavy chain
Q5EFE6	Homo sapiens	potential	Anti-RhD monoclonal T125 kappa light chain
P01008	Homo sapiens	confirmed	Antithrombin-III
Q9ULZ1	Homo sapiens	potential	Apelin
Q6UXC1	Homo sapiens	potential	Apical endosomal glycoprotein
P02647	Homo sapiens	confirmed	Apolipoprotein A-I
Q8NCW5	Homo sapiens	potential	Apolipoprotein A-I-binding protein
P02652	Homo sapiens	confirmed	Apolipoprotein A-II
P06727	Homo sapiens	confirmed	Apolipoprotein A-IV
Q6Q788	Homo sapiens	potential	Apolipoprotein A-V
P04114	Homo sapiens	confirmed	Apolipoprotein B-100
P02654	Homo sapiens	confirmed	Apolipoprotein C-I
P02655	Homo sapiens	confirmed	Apolipoprotein C-II
P02656	Homo sapiens	confirmed	Apolipoprotein C-III
P55056	Homo sapiens	potential	Apolipoprotein C-IV
P05090	Homo sapiens	confirmed	Apolipoprotein D
P02649	Homo sapiens	confirmed	Apolipoprotein E
Q13790	Homo sapiens	potential	Apolipoprotein F
O14791	Homo sapiens	confirmed	Apolipoprotein L1
Q9BPW4	Homo sapiens	potential	Apolipoprotein L4
O95445	Homo sapiens	confirmed	Apolipoprotein M
Q9BUR5	Homo sapiens	potential	Apolipoprotein O
Q6UXV4	Homo sapiens	potential	Apolipoprotein O-like
P08519	Homo sapiens	confirmed	Apolipoprotein(a)
Q16609	Homo sapiens	potential	Apolipoprotein(a)-like protein 2
Q6UW56	Homo sapiens	confirmed	Apoptosis-related protein 3
Q9UBU3	Homo sapiens	confirmed	Appetite-regulating hormone
Q15096	Homo sapiens	potential	APS protein
Q6LDS3	Homo sapiens	potential	APS protein
Q49AH0	Homo sapiens	potential	ARMET-like protein 1
Q5T4W7	Homo sapiens	potential	Artemin
Q6P093	Homo sapiens	potential	Arylacetamide deacetylase-like 2
P15289	Homo sapiens	confirmed	Arylsulfatase A
P15848	Homo sapiens	potential	Arylsulfatase B
P51689	Homo sapiens	potential	Arylsulfatase D
P51690	Homo sapiens	potential	Arylsulfatase E
P54793	Homo sapiens	potential	Arylsulfatase F
Q96EG1	Homo sapiens	potential	Arylsulfatase G
Q5FYB1	Homo sapiens	potential	Arylsulfatase I
Q5FYB0	Homo sapiens	potential	Arylsulfatase J
Q6UWY0	Homo sapiens	potential	Arylsulfatase K
Q9BXN1	Homo sapiens	potential	Asporin
Q6HA08	Homo sapiens	potential	Astacin-like metalloendopeptidase
O14525	Homo sapiens	potential	Astrotactin-1
O75129	Homo sapiens	potential	Astrotactin-2
Q9NP78	Homo sapiens	potential	ATP-binding cassette sub-family B member 9
P01160	Homo sapiens	confirmed	Atrial natriuretic factor
P17342	Homo sapiens	potential	Atrial natriuretic peptide clearance receptor
P16066	Homo sapiens	confirmed	Atrial natriuretic peptide receptor A
P20594	Homo sapiens	potential	Atrial natriuretic peptide receptor B
O75882	Homo sapiens	potential	Attractin
Q5VV63	Homo sapiens	potential	Attractin-like protein 1
Q9H1Z8	Homo sapiens	potential	Augurin
P26442	Homo sapiens	potential	Autocrine motility factor receptor, isoform 1
P20160	Homo sapiens	confirmed	Azurocidin
Q7Z6A9	Homo sapiens	potential	B- and T-lymphocyte attenuator
Q13072	Homo sapiens	potential	B melanoma antigen 1
Q86Y30	Homo sapiens	potential	B melanoma antigen 2
Q86Y29	Homo sapiens	potential	B melanoma antigen 3
Q86Y28	Homo sapiens	potential	B melanoma antigen 4
Q86Y27	Homo sapiens	potential	B melanoma antigen 5
P17213	Homo sapiens	confirmed	Bactericidal permeability-increasing protein
Q8N4F0	Homo sapiens	confirmed	Bactericidal/permeability-increasing protein-like 1
Q8NFQ6	Homo sapiens	potential	Bactericidal/permeability-increasing protein-like 2
Q8NFQ5	Homo sapiens	potential	Bactericidal/permeability-increasing protein-like 3
P98160	Homo sapiens	potential	Basement membrane-specific heparan sulfate proteoglycan core protein
P11362	Homo sapiens	potential	Basic fibroblast growth factor receptor 1
P04280	Homo sapiens	confirmed	Basic salivary proline-rich protein 1
P02812	Homo sapiens	potential	Basic salivary proline-rich protein 2
Q04118	Homo sapiens	potential	Basic salivary proline-rich protein 3
P10163	Homo sapiens	confirmed	Basic salivary proline-rich protein 4
P35613	Homo sapiens	confirmed	Basigin
P11912	Homo sapiens	confirmed	B-cell antigen receptor complex-associated protein alpha-chain
P40259	Homo sapiens	confirmed	B-cell antigen receptor complex-associated protein beta-chain
P20273	Homo sapiens	potential	B-cell receptor CD22
Q16620	Homo sapiens	confirmed	BDNF/NT-3 growth factors receptor
P02749	Homo sapiens	confirmed	Beta-2-glycoprotein 1
P61769	Homo sapiens	confirmed	Beta-2-microglobulin
Q96KN2	Homo sapiens	potential	Beta-Ala-His dipeptidase
P05814	Homo sapiens	confirmed	Beta-casein
P60022	Homo sapiens	potential	Beta-defensin 1
P81534	Homo sapiens	confirmed	Beta-defensin 103
Q8WTQ1	Homo sapiens	potential	Beta-defensin 104
Q8NG35	Homo sapiens	potential	Beta-defensin 105
Q8N104	Homo sapiens	potential	Beta-defensin 106
Q8IZN7	Homo sapiens	potential	Beta-defensin 107
A8MXU0	Homo sapiens	potential	Beta-defensin 108A
Q8NET1	Homo sapiens	potential	Beta-defensin 108B
A6NDD2	Homo sapiens	potential	Beta-defensin 108B-like
Q30KR1	Homo sapiens	potential	Beta-defensin 109
Q30KR0	Homo sapiens	potential	Beta-defensin 110
Q30KQ9	Homo sapiens	potential	Beta-defensin 111
Q30KQ7	Homo sapiens	potential	Beta-defensin 113
Q30KQ6	Homo sapiens	potential	Beta-defensin 114
Q30KQ5	Homo sapiens	potential	Beta-defensin 115
Q30KQ4	Homo sapiens	potential	Beta-defensin 116
Q96PH6	Homo sapiens	potential	Beta-defensin 118
Q8N690	Homo sapiens	potential	Beta-defensin 119
Q5J5C9	Homo sapiens	potential	Beta-defensin 121
Q8N688	Homo sapiens	potential	Beta-defensin 123
Q8NES8	Homo sapiens	potential	Beta-defensin 124
Q8N687	Homo sapiens	potential	Beta-defensin 125
Q9BYW3	Homo sapiens	potential	Beta-defensin 126
Q9H1M4	Homo sapiens	confirmed	Beta-defensin 127
Q7Z7B8	Homo sapiens	potential	Beta-defensin 128
Q9H1M3	Homo sapiens	potential	Beta-defensin 129
Q30KQ2	Homo sapiens	potential	Beta-defensin 130
P59861	Homo sapiens	potential	Beta-defensin 131
Q7Z7B7	Homo sapiens	potential	Beta-defensin 132
Q30KQ1	Homo sapiens	potential	Beta-defensin 133
Q4QY38	Homo sapiens	potential	Beta-defensin 134
Q30KP9	Homo sapiens	potential	Beta-defensin 135
Q30KP8	Homo sapiens	potential	Beta-defensin 136
O15263	Homo sapiens	potential	Beta-defensin 2
P16278	Homo sapiens	confirmed	Beta-galactosidase
Q6UWU2	Homo sapiens	potential	Beta-galactosidase-1-like protein
Q8IW92	Homo sapiens	potential	Beta-galactosidase-1-like protein 2
P08236	Homo sapiens	confirmed	Beta-glucuronidase
P06865	Homo sapiens	confirmed	Beta-hexosaminidase subunit alpha
P07686	Homo sapiens	potential	Beta-hexosaminidase subunit beta
O00462	Homo sapiens	potential	Beta-mannosidase
P08118	Homo sapiens	confirmed	Beta-microseminoprotein
P01213	Homo sapiens	confirmed	Beta-neoendorphin-dynorphin
P01138	Homo sapiens	potential	Beta-nerve growth factor
P56817	Homo sapiens	potential	Beta-secretase 1
Q9Y5Z0	Homo sapiens	potential	Beta-secretase 2
Q96PL2	Homo sapiens	potential	Beta-tectorin
P09619	Homo sapiens	confirmed	Beta-type platelet-derived growth factor receptor
P21810	Homo sapiens	potential	Biglycan
P19835	Homo sapiens	confirmed	Bile salt-activated lipase
P43251	Homo sapiens	confirmed	Biotinidase
P15391	Homo sapiens	potential	B-lymphocyte antigen CD19
Q13145	Homo sapiens	confirmed	BMP and activin membrane-bound inhibitor homolog
Q8N8U9	Homo sapiens	potential	BMP-binding endothelial regulator protein
P13727	Homo sapiens	confirmed	Bone marrow proteoglycan
P13497	Homo sapiens	potential	Bone morphogenetic protein 1
O95393	Homo sapiens	potential	Bone morphogenetic protein 10
O95972	Homo sapiens	potential	Bone morphogenetic protein 15
P12643	Homo sapiens	potential	Bone morphogenetic protein 2
P12645	Homo sapiens	potential	Bone morphogenetic protein 3
P55107	Homo sapiens	potential	Bone morphogenetic protein 3b
P12644	Homo sapiens	potential	Bone morphogenetic protein 4
P22003	Homo sapiens	potential	Bone morphogenetic protein 5
P22004	Homo sapiens	potential	Bone morphogenetic protein 6
P18075	Homo sapiens	potential	Bone morphogenetic protein 7
Q7Z5Y6	Homo sapiens	potential	Bone morphogenetic protein 8A
P34820	Homo sapiens	potential	Bone morphogenetic protein 8B
P36894	Homo sapiens	potential	Bone morphogenetic protein receptor type-1A
O00238	Homo sapiens	potential	Bone morphogenetic protein receptor type-1B
Q13873	Homo sapiens	potential	Bone morphogenetic protein receptor type-2
P21815	Homo sapiens	confirmed	Bone sialoprotein 2
Q075Z2	Homo sapiens	potential	Bovine seminal plasma protein homolog 1
P23560	Homo sapiens	potential	Brain-derived neurotrophic factor
O14514	Homo sapiens	potential	Brain-specific angiogenesis inhibitor 1
O60241	Homo sapiens	potential	Brain-specific angiogenesis inhibitor 2
Q9GZN4	Homo sapiens	potential	Brain-specific serine protease 4
Q96GW7	Homo sapiens	potential	Brevican core protein
Q2TAL6	Homo sapiens	potential	Brorin
Q9BWV1	Homo sapiens	confirmed	Brother of CDO
A6NE02	Homo sapiens	potential	BTB/POZ domain-containing protein 17
Q13410	Homo sapiens	by similarity	Butyrophilin subfamily 1 member A1
Q7KYR7	Homo sapiens	potential	Butyrophilin subfamily 2 member A1
Q8WVV5	Homo sapiens	potential	Butyrophilin subfamily 2 member A2
Q96KV6	Homo sapiens	potential	Butyrophilin subfamily 2 member A3
O00481	Homo sapiens	potential	Butyrophilin subfamily 3 member A1
P78410	Homo sapiens	potential	Butyrophilin subfamily 3 member A2
O00478	Homo sapiens	confirmed	Butyrophilin subfamily 3 member A3
Q6UXE8	Homo sapiens	potential	Butyrophilin-like protein 3
Q6UX41	Homo sapiens	confirmed	Butyrophilin-like protein 8
Q6UXG8	Homo sapiens	potential	Butyrophilin-like protein 9
Q8IXK1	Homo sapiens	potential	C1q receptor protein
O75973	Homo sapiens	potential	C1q-related factor
Q9Y426	Homo sapiens	potential	C2 domain-containing protein 2
Q8IZJ3	Homo sapiens	potential	C3 and PZP-like alpha-2-macroglobulin domain-containing protein 8
P04003	Homo sapiens	confirmed	C4b-binding protein alpha chain
P20851	Homo sapiens	confirmed	C4b-binding protein beta chain
Q9NYQ6	Homo sapiens	potential	Cadherin EGF LAG seven-pass G-type receptor 1
Q9HCU4	Homo sapiens	potential	Cadherin EGF LAG seven-pass G-type receptor 2
Q9NYQ7	Homo sapiens	potential	Cadherin EGF LAG seven-pass G-type receptor 3
Q9Y6N8	Homo sapiens	potential	Cadherin-10
P55287	Homo sapiens	potential	Cadherin-11
P55289	Homo sapiens	potential	Cadherin-12
P55290	Homo sapiens	potential	Cadherin-13
P55291	Homo sapiens	potential	Cadherin-15
O75309	Homo sapiens	potential	Cadherin-16
Q12864	Homo sapiens	potential	Cadherin-17
Q13634	Homo sapiens	potential	Cadherin-18
Q9H159	Homo sapiens	potential	Cadherin-19
P19022	Homo sapiens	potential	Cadherin-2
Q9HBT6	Homo sapiens	potential	Cadherin-20
Q9UJ99	Homo sapiens	potential	Cadherin-22
Q9H251	Homo sapiens	potential	Cadherin-23
Q86UP0	Homo sapiens	potential	Cadherin-24
P22223	Homo sapiens	potential	Cadherin-3
P55283	Homo sapiens	potential	Cadherin-4
P33151	Homo sapiens	potential	Cadherin-5
P55285	Homo sapiens	potential	Cadherin-6
Q9ULB5	Homo sapiens	potential	Cadherin-7
P55286	Homo sapiens	potential	Cadherin-8
Q9ULB4	Homo sapiens	potential	Cadherin-9
Q8IXH8	Homo sapiens	potential	Cadherin-like protein 26
Q6ZTQ4	Homo sapiens	potential	Cadherin-like protein 28
A6H8M9	Homo sapiens	potential	Cadherin-like protein 29
P01258	Homo sapiens	potential	Calcitonin
P06881	Homo sapiens	potential	Calcitonin gene-related peptide 1
P10092	Homo sapiens	potential	Calcitonin gene-related peptide 2
Q16602	Homo sapiens	confirmed	Calcitonin gene-related peptide type 1 receptor
P30988	Homo sapiens	confirmed	Calcitonin receptor
A8K7I4	Homo sapiens	potential	Calcium-activated chloride channel regulator 1
Q9UQC9	Homo sapiens	potential	Calcium-activated chloride channel regulator 2
Q14CN2	Homo sapiens	potential	Calcium-activated chloride channel regulator 4
Q9Y6N3	Homo sapiens	potential	Calcium-activated chloride channel regulator family member 3
P39877	Homo sapiens	potential	Calcium-dependent phospholipase A2
O14967	Homo sapiens	potential	Calmegin
P27824	Homo sapiens	potential	Calnexin
P27797	Homo sapiens	confirmed	Calreticulin
Q96L12	Homo sapiens	potential	Calreticulin-3
P31415	Homo sapiens	probable	Calsequestrin-1
O14958	Homo sapiens	by similarity	Calsequestrin-2
O94985	Homo sapiens	confirmed	Calsyntenin-1
Q9H4D0	Homo sapiens	potential	Calsyntenin-2
Q9BQT9	Homo sapiens	potential	Calsyntenin-3
O43852	Homo sapiens	confirmed	Calumenin
P31358	Homo sapiens	confirmed	CAMPATH-1 antigen
Q8IW45	Homo sapiens	potential	Carbohydrate kinase domain-containing protein
O43570	Homo sapiens	potential	Carbonic anhydrase 12
Q9ULX7	Homo sapiens	potential	Carbonic anhydrase 14
P22748	Homo sapiens	confirmed	Carbonic anhydrase 4
P23280	Homo sapiens	potential	Carbonic anhydrase 6
Q16790	Homo sapiens	confirmed	Carbonic anhydrase 9
O75493	Homo sapiens	potential	Carbonic anhydrase-related protein 11
O00748	Homo sapiens	confirmed	Carboxylesterase 2
Q6UWW8	Homo sapiens	potential	Carboxylesterase 3
Q6NT32	Homo sapiens	potential	Carboxylesterase 7
Q5XG92	Homo sapiens	potential	Carboxylesterase UNQ440/PRO873
P15085	Homo sapiens	confirmed	Carboxypeptidase A1
P48052	Homo sapiens	potential	Carboxypeptidase A2
Q9UI42	Homo sapiens	potential	Carboxypeptidase A4
Q8WXQ8	Homo sapiens	potential	Carboxypeptidase A5
Q8N4T0	Homo sapiens	potential	Carboxypeptidase A6
P15086	Homo sapiens	confirmed	Carboxypeptidase B
Q96IY4	Homo sapiens	potential	Carboxypeptidase B2
O75976	Homo sapiens	potential	Carboxypeptidase D
P16870	Homo sapiens	potential	Carboxypeptidase E
P14384	Homo sapiens	confirmed	Carboxypeptidase M
P15169	Homo sapiens	confirmed	Carboxypeptidase N catalytic chain
P22792	Homo sapiens	potential	Carboxypeptidase N subunit 2
Q8IVL8	Homo sapiens	potential	Carboxypeptidase O
Q66K79	Homo sapiens	potential	Carboxypeptidase Z
Q8N436	Homo sapiens	potential	Carboxypeptidase-like protein X2
Q13985	Homo sapiens	potential	Carcinoembryonic antigen
P13688	Homo sapiens	confirmed	Carcinoembryonic antigen-related cell adhesion molecule 1
Q2WEN9	Homo sapiens	potential	Carcinoembryonic antigen-related cell adhesion molecule 16
A8MTB9	Homo sapiens	potential	Carcinoembryonic antigen-related cell adhesion molecule 18
Q7Z692	Homo sapiens	potential	Carcinoembryonic antigen-related cell adhesion molecule 19
Q6UY09	Homo sapiens	potential	Carcinoembryonic antigen-related cell adhesion molecule 20
Q3KPI0	Homo sapiens	potential	Carcinoembryonic antigen-related cell adhesion molecule 21
P40198	Homo sapiens	by similarity	Carcinoembryonic antigen-related cell adhesion molecule 3
O75871	Homo sapiens	potential	Carcinoembryonic antigen-related cell adhesion molecule 4
P06731	Homo sapiens	confirmed	Carcinoembryonic antigen-related cell adhesion molecule 5
P40199	Homo sapiens	confirmed	Carcinoembryonic antigen-related cell adhesion molecule 6
P40199	Homo sapiens	potential	Carcinoembryonic antigen-related cell adhesion molecule 6
Q14002	Homo sapiens	confirmed	Carcinoembryonic antigen-related cell adhesion molecule 7
P31997	Homo sapiens	confirmed	Carcinoembryonic antigen-related cell adhesion molecule 8
Q9UBD9	Homo sapiens	potential	Cardiotrophin-like cytokine factor 1
Q9NQ79	Homo sapiens	potential	Cartilage acidic protein 1
O75339	Homo sapiens	potential	Cartilage intermediate layer protein 1
Q8IUL8	Homo sapiens	potential	Cartilage intermediate layer protein 2
P21941	Homo sapiens	confirmed	Cartilage matrix protein
P49747	Homo sapiens	potential	Cartilage oligomeric matrix protein
O75718	Homo sapiens	potential	Cartilage-associated protein
Q96PB1	Homo sapiens	potential	CAS1 domain-containing protein 1
Q9NZK5	Homo sapiens	potential	Cat eye syndrome critical region protein 1
Q9BXW7	Homo sapiens	potential	Cat eye syndrome critical region protein 5
P49913	Homo sapiens	potential	Cathelicidin antimicrobial peptide
P07858	Homo sapiens	potential	Cathepsin B
P07339	Homo sapiens	confirmed	Cathepsin D
P14091	Homo sapiens	confirmed	Cathepsin E
Q9UBX1	Homo sapiens	potential	Cathepsin F
P08311	Homo sapiens	confirmed	Cathepsin G
P09668	Homo sapiens	confirmed	Cathepsin H
P43235	Homo sapiens	potential	Cathepsin K
P07711	Homo sapiens	potential	Cathepsin L1
O60911	Homo sapiens	potential	Cathepsin L2
P43234	Homo sapiens	potential	Cathepsin O
P25774	Homo sapiens	potential	Cathepsin S
P56202	Homo sapiens	confirmed	Cathepsin W
Q9UBR2	Homo sapiens	potential	Cathepsin Z
Q6ZRH7	Homo sapiens	potential	Cation channel sperm-associated protein subunit gamma
P20645	Homo sapiens	confirmed	Cation-dependent mannose-6-phosphate receptor
P11717	Homo sapiens	confirmed	Cation-independent mannose-6-phosphate receptor
P32248	Homo sapiens	potential	C-C chemokine receptor type 7
P22362	Homo sapiens	confirmed	C-C motif chemokine 1
Q99616	Homo sapiens	confirmed	C-C motif chemokine 13
Q16627	Homo sapiens	confirmed	C-C motif chemokine 14
Q16663	Homo sapiens	confirmed	C-C motif chemokine 15
O15467	Homo sapiens	confirmed	C-C motif chemokine 16
Q92583	Homo sapiens	confirmed	C-C motif chemokine 17
P55774	Homo sapiens	confirmed	C-C motif chemokine 18
Q99731	Homo sapiens	confirmed	C-C motif chemokine 19
P13500	Homo sapiens	confirmed	C-C motif chemokine 2
P78556	Homo sapiens	confirmed	C-C motif chemokine 20
O00585	Homo sapiens	confirmed	C-C motif chemokine 21
O00626	Homo sapiens	confirmed	C-C motif chemokine 22
P55773	Homo sapiens	confirmed	C-C motif chemokine 23
O00175	Homo sapiens	confirmed	C-C motif chemokine 24
O15444	Homo sapiens	potential	C-C motif chemokine 25
Q9Y258	Homo sapiens	confirmed	C-C motif chemokine 26
Q9Y4X3	Homo sapiens	confirmed	C-C motif chemokine 27
Q9NRJ3	Homo sapiens	potential	C-C motif chemokine 28
P10147	Homo sapiens	confirmed	C-C motif chemokine 3
P16619	Homo sapiens	confirmed	C-C motif chemokine 3-like 1
P13236	Homo sapiens	confirmed	C-C motif chemokine 4
Q8NHW4	Homo sapiens	by similarity	C-C motif chemokine 4-like
P13501	Homo sapiens	confirmed	C-C motif chemokine 5
P80098	Homo sapiens	confirmed	C-C motif chemokine 7
P80075	Homo sapiens	probable	C-C motif chemokine 8
Q6YHK3	Homo sapiens	confirmed	CD109 antigen
O95971	Homo sapiens	potential	CD160 antigen
Q6UWJ8	Homo sapiens	confirmed	CD164 sialomucin-like 2 protein
Q13740	Homo sapiens	potential	CD166 antigen
Q8N6Q3	Homo sapiens	confirmed	CD177 antigen
Q99467	Homo sapiens	confirmed	CD180 antigen
Q9H2B3	Homo sapiens	potential	CD21
Q15762	Homo sapiens	confirmed	CD226 antigen
P26842	Homo sapiens	confirmed	CD27 antigen
Q5ZPR3	Homo sapiens	confirmed	CD276 antigen
Q8IX05	Homo sapiens	potential	CD302 antigen
Q9NPF0	Homo sapiens	confirmed	CD320 antigen
P16070	Homo sapiens	by similarity	CD44 antigen
P09326	Homo sapiens	potential	CD48 antigen
O43866	Homo sapiens	confirmed	CD5 antigen-like
P13987	Homo sapiens	confirmed	CD59 glycoprotein
Q01151	Homo sapiens	confirmed	CD83 antigen
P48960	Homo sapiens	potential	CD97 antigen
P14209	Homo sapiens	confirmed	CD99 antigen
Q8TCZ2	Homo sapiens	potential	CD99 antigen-like protein 2
Q9BY67	Homo sapiens	potential	Cell adhesion molecule 1
Q8N3J6	Homo sapiens	potential	Cell adhesion molecule 2
Q8N126	Homo sapiens	confirmed	Cell adhesion molecule 3
Q8NFZ8	Homo sapiens	potential	Cell adhesion molecule 4
Q4KMG0	Homo sapiens	potential	Cell adhesion molecule-related/down-regulated by oncogenes
Q99795	Homo sapiens	confirmed	Cell surface A33 antigen
Q29782	Homo sapiens	potential	Cell surface glycoprotein
Q8TD46	Homo sapiens	potential	Cell surface glycoprotein CD200 receptor 1
Q6Q8B3	Homo sapiens	potential	Cell surface glycoprotein CD200 receptor 2
P43121	Homo sapiens	confirmed	Cell surface glycoprotein MUC18
O95813	Homo sapiens	confirmed	Cerberus
P23435	Homo sapiens	potential	Cerebellin-1
Q6UW01	Homo sapiens	confirmed	Cerebellin-3
Q9NTU7	Homo sapiens	confirmed	Cerebellin-4
O75503	Homo sapiens	potential	Ceroid-lipofuscinosis neuronal protein 5
P00450	Homo sapiens	confirmed	Ceruloplasmin
Q9BWS9	Homo sapiens	potential	Chitinase domain-containing protein 1
P36222	Homo sapiens	confirmed	Chitinase-3-like protein 1
Q15782	Homo sapiens	confirmed	Chitinase-3-like protein 2
Q13231	Homo sapiens	confirmed	Chitotriosidase-1
Q96S66	Homo sapiens	potential	Chloride channel CLIC-like protein 1
P06307	Homo sapiens	confirmed	Cholecystokinin
P11597	Homo sapiens	confirmed	Cholesteryl ester transfer protein
P06276	Homo sapiens	confirmed	Cholinesterase
O15335	Homo sapiens	potential	Chondroadherin
Q6NUI6	Homo sapiens	potential	Chondroadherin-like protein
Q6UVK1	Homo sapiens	potential	Chondroitin sulfate proteoglycan 4
O95196	Homo sapiens	potential	Chondroitin sulfate proteoglycan 5
Q9H9P2	Homo sapiens	potential	Chondrolectin
Q9H2X0	Homo sapiens	potential	Chordin
Q9BU40	Homo sapiens	potential	Chordin-like protein 1
Q6WN34	Homo sapiens	confirmed	Chordin-like protein 2
P01233	Homo sapiens	confirmed	Choriogonadotropin subunit beta
A6NKQ9	Homo sapiens	potential	Choriogonadotropin subunit beta variant 1
Q6NT52	Homo sapiens	potential	Choriogonadotropin subunit beta variant 2
P01243	Homo sapiens	confirmed	Chorionic somatomammotropin hormone
Q14406	Homo sapiens	potential	Chorionic somatomammotropin hormone-like 1
P10645	Homo sapiens	confirmed	Chromogranin-A
P23946	Homo sapiens	confirmed	Chymase
Q99895	Homo sapiens	potential	Chymotrypsin-C
P40313	Homo sapiens	potential	Chymotrypsin-like protease CTRL-1
P17538	Homo sapiens	confirmed	Chymotrypsinogen B
Q6GPI1	Homo sapiens	by similarity	Chymotrypsinogen B2
P26992	Homo sapiens	potential	Ciliary neurotrophic factor receptor alpha
P10909	Homo sapiens	confirmed	Clusterin
Q15846	Homo sapiens	potential	Clusterin-like protein 1
Q8TDQ1	Homo sapiens	confirmed	CMRF35-like molecule 1
Q496F6	Homo sapiens	potential	CMRF35-like molecule 2
Q6UXZ3	Homo sapiens	potential	CMRF35-like molecule 4
Q08708	Homo sapiens	potential	CMRF35-like molecule 6
A8K4G0	Homo sapiens	potential	CMRF35-like molecule 7
Q9UGN4	Homo sapiens	potential	CMRF35-like molecule 8
Q6UXG3	Homo sapiens	confirmed	CMRF35-like molecule 9
P00740	Homo sapiens	potential	Coagulation factor IX
P12259	Homo sapiens	confirmed	Coagulation factor V
P08709	Homo sapiens	potential	Coagulation factor VII
P00451	Homo sapiens	confirmed	Coagulation factor VIII
P00742	Homo sapiens	potential	Coagulation factor X
P03951	Homo sapiens	confirmed	Coagulation factor XI
P00748	Homo sapiens	confirmed	Coagulation factor XII
P05160	Homo sapiens	confirmed	Coagulation factor XIII B chain
Q16568	Homo sapiens	confirmed	Cocaine- and amphetamine-regulated transcript protein
O43405	Homo sapiens	potential	Cochlin
Q8WV48	Homo sapiens	potential	Coiled-coil domain-containing protein 107
Q96EE4	Homo sapiens	potential	Coiled-coil domain-containing protein 126
Q9H6E4	Homo sapiens	potential	Coiled-coil domain-containing protein 134
Q9BQI4	Homo sapiens	potential	Coiled-coil domain-containing protein 3
Q96A33	Homo sapiens	potential	Coiled-coil domain-containing protein 47
Q6NSX1	Homo sapiens	potential	Coiled-coil domain-containing protein 70
Q76M96	Homo sapiens	potential	Coiled-coil domain-containing protein 80
P04118	Homo sapiens	confirmed	Colipase
Q6UWE3	Homo sapiens	confirmed	Colipase-like protein C6orf126
A2RUU4	Homo sapiens	potential	Colipase-like protein C6orf127
P02452	Homo sapiens	confirmed	Collagen alpha-1(I) chain
P02458	Homo sapiens	potential	Collagen alpha-1(II) chain
P02461	Homo sapiens	confirmed	Collagen alpha-1(III) chain
P02462	Homo sapiens	confirmed	Collagen alpha-1(IV) chain
P20849	Homo sapiens	confirmed	Collagen alpha-1(IX) chain
P20908	Homo sapiens	potential	Collagen alpha-1(V) chain
P12109	Homo sapiens	confirmed	Collagen alpha-1(VI) chain
Q02388	Homo sapiens	potential	Collagen alpha-1(VII) chain
P27658	Homo sapiens	potential	Collagen alpha-1(VIII) chain
Q03692	Homo sapiens	potential	Collagen alpha-1(X) chain
P12107	Homo sapiens	potential	Collagen alpha-1(XI) chain
Q99715	Homo sapiens	potential	Collagen alpha-1(XII) chain
Q05707	Homo sapiens	potential	Collagen alpha-1(XIV) chain
Q14993	Homo sapiens	potential	Collagen alpha-1(XIX) chain
P39059	Homo sapiens	potential	Collagen alpha-1(XV) chain
Q07092	Homo sapiens	confirmed	Collagen alpha-1(XVI) chain
P39060	Homo sapiens	potential	Collagen alpha-1(XVIII) chain
Q9P218	Homo sapiens	potential	Collagen alpha-1(XX) chain
Q96P44	Homo sapiens	potential	Collagen alpha-1(XXI) chain
Q8NFW1	Homo sapiens	potential	Collagen alpha-1(XXII) chain
Q17RW2	Homo sapiens	potential	Collagen alpha-1(XXIV) chain
Q96A83	Homo sapiens	potential	Collagen alpha-1(XXVI) chain
Q8IZC6	Homo sapiens	potential	Collagen alpha-1(XXVII) chain
Q2UY09	Homo sapiens	potential	Collagen alpha-1(XXVIII) chain
P08123	Homo sapiens	potential	Collagen alpha-2(I) chain
P08572	Homo sapiens	confirmed	Collagen alpha-2(IV) chain
Q14055	Homo sapiens	potential	Collagen alpha-2(IX) chain
P05997	Homo sapiens	confirmed	Collagen alpha-2(V) chain
P12110	Homo sapiens	potential	Collagen alpha-2(VI) chain
P25067	Homo sapiens	potential	Collagen alpha-2(VIII) chain
P13942	Homo sapiens	potential	Collagen alpha-2(XI) chain
Q01955	Homo sapiens	potential	Collagen alpha-3(IV) chain
Q14050	Homo sapiens	potential	Collagen alpha-3(IX) chain
P25940	Homo sapiens	potential	Collagen alpha-3(V) chain
P12111	Homo sapiens	potential	Collagen alpha-3(VI) chain
P53420	Homo sapiens	potential	Collagen alpha-4(IV) chain
P29400	Homo sapiens	potential	Collagen alpha-5(IV) chain
A8TX70	Homo sapiens	potential	Collagen alpha-5(VI) chain
Q14031	Homo sapiens	potential	Collagen alpha-6(IV) chain
A6NMZ7	Homo sapiens	potential	Collagen alpha-6(VI) chain
Q6UXH8	Homo sapiens	potential	Collagen and calcium-binding EGF domain-containing protein 1
Q96CG8	Homo sapiens	confirmed	Collagen triple helix repeat-containing protein 1
P45452	Homo sapiens	potential	Collagenase 3
Q9Y6Z7	Homo sapiens	potential	Collectin-10
Q9BWP8	Homo sapiens	potential	Collectin-11
Q9HBJ8	Homo sapiens	potential	Collectrin
P02745	Homo sapiens	confirmed	Complement C1q subcomponent subunit A
P02746	Homo sapiens	confirmed	Complement C1q subcomponent subunit B
P02747	Homo sapiens	confirmed	Complement C1q subcomponent subunit C
Q9BXJ1	Homo sapiens	potential	Complement C1q tumor necrosis factor-related protein 1
Q9BXJ5	Homo sapiens	potential	Complement C1q tumor necrosis factor-related protein 2
Q9BXJ4	Homo sapiens	potential	Complement C1q tumor necrosis factor-related protein 3
Q9BXJ3	Homo sapiens	potential	Complement C1q tumor necrosis factor-related protein 4
Q9BXJ0	Homo sapiens	confirmed	Complement C1q tumor necrosis factor-related protein 5
Q9BXI9	Homo sapiens	confirmed	Complement C1q tumor necrosis factor-related protein 6
Q9BXJ2	Homo sapiens	potential	Complement C1q tumor necrosis factor-related protein 7
P60827	Homo sapiens	potential	Complement C1q tumor necrosis factor-related protein 8
P0C862	Homo sapiens	potential	Complement C1q tumor necrosis factor-related protein 9
B2RNN3	Homo sapiens	potential	Complement C1q tumor necrosis factor-related protein 9-like
Q7Z5L3	Homo sapiens	potential	Complement C1q-like protein 2
Q5VWW1	Homo sapiens	potential	Complement C1q-like protein 3
Q86Z23	Homo sapiens	potential	Complement C1q-like protein 4
P00736	Homo sapiens	confirmed	Complement C1r subcomponent
Q9NZP8	Homo sapiens	potential	Complement C1r subcomponent-like protein
P09871	Homo sapiens	confirmed	Complement C1s subcomponent
P06681	Homo sapiens	confirmed	Complement C2
P01024	Homo sapiens	confirmed	Complement C3
P0C0L4	Homo sapiens	confirmed	Complement C4-A
P0C0L5	Homo sapiens	confirmed	Complement C4-B
P01031	Homo sapiens	potential	Complement C5
Q9UGI4	Homo sapiens	potential	Complement component 9
Q9NPY3	Homo sapiens	confirmed	Complement component C1q receptor
P13671	Homo sapiens	confirmed	Complement component C6
P10643	Homo sapiens	confirmed	Complement component C7
P07357	Homo sapiens	potential	Complement component C8 alpha chain
P07358	Homo sapiens	potential	Complement component C8 beta chain
P07360	Homo sapiens	confirmed	Complement component C8 gamma chain
P02748	Homo sapiens	confirmed	Complement component C9
Q2VPA4	Homo sapiens	potential	Complement component receptor 1-like protein
P08174	Homo sapiens	confirmed	Complement decay-accelerating factor
P00751	Homo sapiens	confirmed	Complement factor B
P00746	Homo sapiens	potential	Complement factor D
P08603	Homo sapiens	confirmed	Complement factor H
Q03591	Homo sapiens	potential	Complement factor H-related protein 1
P36980	Homo sapiens	confirmed	Complement factor H-related protein 2
Q02985	Homo sapiens	potential	Complement factor H-related protein 3
Q92496	Homo sapiens	potential	Complement factor H-related protein 4
Q5DVJ7	Homo sapiens	potential	Complement factor H-related protein 4A
Q9BXR6	Homo sapiens	potential	Complement factor H-related protein 5
P05156	Homo sapiens	confirmed	Complement factor I
P17927	Homo sapiens	confirmed	Complement receptor type 1
P20023	Homo sapiens	confirmed	Complement receptor type 2
P48740	Homo sapiens	potential	Complement-activating component of Ra-reactive factor
P29279	Homo sapiens	potential	Connective tissue growth factor
Q12860	Homo sapiens	confirmed	Contactin-1
Q02246	Homo sapiens	confirmed	Contactin-2
Q9P232	Homo sapiens	potential	Contactin-3
Q8IWV2	Homo sapiens	potential	Contactin-4
O94779	Homo sapiens	potential	Contactin-5
Q9UQ52	Homo sapiens	potential	Contactin-6
P78357	Homo sapiens	potential	Contactin-associated protein 1
Q9UHC6	Homo sapiens	potential	Contactin-associated protein-like 2
Q9BZ76	Homo sapiens	potential	Contactin-associated protein-like 3
Q96NU0	Homo sapiens	potential	Contactin-associated protein-like 3B
Q9C0A0	Homo sapiens	potential	Contactin-associated protein-like 4
Q8WYK1	Homo sapiens	potential	Contactin-associated protein-like 5
Q15517	Homo sapiens	potential	Corneodesmosin
P06850	Homo sapiens	probable	Corticoliberin
P08185	Homo sapiens	confirmed	Corticosteroid-binding globulin
P01189	Homo sapiens	confirmed	Corticotropin-lipotropin
P34998	Homo sapiens	confirmed	Corticotropin-releasing factor receptor 1
Q13324	Homo sapiens	potential	Corticotropin-releasing factor receptor 2
P24387	Homo sapiens	confirmed	Corticotropin-releasing factor-binding protein
O00230	Homo sapiens	potential	Cortistatin
P78310	Homo sapiens	potential	Coxsackievirus and adenovirus receptor
P02741	Homo sapiens	confirmed	C-reactive protein
P82279	Homo sapiens	potential	Crumbs homolog 1
Q5IJ48	Homo sapiens	potential	Crumbs homolog 2
Q9BUF7	Homo sapiens	potential	Crumbs protein homolog 3
Q9GZR3	Homo sapiens	potential	Cryptic protein
Q9Y240	Homo sapiens	confirmed	C-type lectin domain family 11 member A
Q86T13	Homo sapiens	confirmed	C-type lectin domain family 14 member A
O75596	Homo sapiens	potential	C-type lectin domain family 3 member A
Q6UXS0	Homo sapiens	potential	C-type lectin domain-containing protein UNQ5810/PRO19627
Q9UBG0	Homo sapiens	potential	C-type mannose receptor 2
P23582	Homo sapiens	potential	C-type natriuretic peptide
Q96PZ7	Homo sapiens	potential	CUB and sushi domain-containing protein 1
Q7Z407	Homo sapiens	potential	CUB and sushi domain-containing protein 3
Q86UP6	Homo sapiens	potential	CUB and zona pellucida-like domain-containing protein 1
Q9H5V8	Homo sapiens	confirmed	CUB domain-containing protein 1
Q5VXM1	Homo sapiens	potential	CUB domain-containing protein 2
O60494	Homo sapiens	potential	Cubilin
P02778	Homo sapiens	confirmed	C-X-C motif chemokine 10
O14625	Homo sapiens	confirmed	C-X-C motif chemokine 11
O43927	Homo sapiens	potential	C-X-C motif chemokine 13
O95715	Homo sapiens	potential	C-X-C motif chemokine 14
Q9H2A7	Homo sapiens	potential	C-X-C motif chemokine 16
P19875	Homo sapiens	confirmed	C-X-C motif chemokine 2
P19876	Homo sapiens	confirmed	C-X-C motif chemokine 3
P42830	Homo sapiens	confirmed	C-X-C motif chemokine 5
P80162	Homo sapiens	confirmed	C-X-C motif chemokine 6
Q07325	Homo sapiens	confirmed	C-X-C motif chemokine 9
Q9H112	Homo sapiens	potential	Cystatin-11
O60676	Homo sapiens	potential	Cystatin-8
Q5W186	Homo sapiens	potential	Cystatin-9
Q9H4G1	Homo sapiens	confirmed	Cystatin-9-like
P01034	Homo sapiens	confirmed	Cystatin-C
P28325	Homo sapiens	confirmed	Cystatin-D
O76096	Homo sapiens	potential	Cystatin-F
Q9H114	Homo sapiens	potential	Cystatin-like 1
Q15828	Homo sapiens	probable	Cystatin-M
P01036	Homo sapiens	confirmed	Cystatin-S
P09228	Homo sapiens	confirmed	Cystatin-SA
P01037	Homo sapiens	confirmed	Cystatin-SN
Q96J86	Homo sapiens	potential	Cysteine and tyrosine-rich protein 1
Q9NZV1	Homo sapiens	confirmed	Cysteine-rich motor neuron 1 protein
Q6ZWJ8	Homo sapiens	potential	Cysteine-rich motor neuron 2 protein
P54107	Homo sapiens	confirmed	Cysteine-rich secretory protein 1
P16562	Homo sapiens	potential	Cysteine-rich secretory protein 2
P54108	Homo sapiens	potential	Cysteine-rich secretory protein 3
Q9H336	Homo sapiens	potential	Cysteine-rich secretory protein LCCL domain-containing 1
Q9H0B8	Homo sapiens	potential	Cysteine-rich secretory protein LCCL domain-containing 2
Q96HD1	Homo sapiens	potential	Cysteine-rich with EGF-like domain protein 1
Q6UXH1	Homo sapiens	confirmed	Cysteine-rich with EGF-like domain protein 2
P31785	Homo sapiens	confirmed	Cytokine receptor common gamma chain
P32927	Homo sapiens	potential	Cytokine receptor common subunit beta
O75462	Homo sapiens	confirmed	Cytokine receptor-like factor 1
Q9HC73	Homo sapiens	potential	Cytokine receptor-like factor 2
Q9UBD3	Homo sapiens	confirmed	Cytokine SCM-1 beta
Q9NRR1	Homo sapiens	confirmed	Cytokine-like protein 1
O95727	Homo sapiens	potential	Cytotoxic and regulatory T-cell molecule
P16410	Homo sapiens	potential	Cytotoxic T-lymphocyte protein 4
Q8N907	Homo sapiens	potential	DAN domain family member 5
Q6UVY6	Homo sapiens	potential	DBH-like monooxygenase protein 1
Q96HY6	Homo sapiens	potential	DDRGK domain-containing protein 1
P07585	Homo sapiens	potential	Decorin
Q01523	Homo sapiens	potential	Defensin-5
Q01524	Homo sapiens	potential	Defensin-6
Q6UWP2	Homo sapiens	potential	Dehydrogenase/reductase SDR family member 11
Q6UX07	Homo sapiens	potential	Dehydrogenase/reductase SDR family member 13
Q6PKH6	Homo sapiens	potential	Dehydrogenase/reductase SDR family member 4-like 2
Q9Y394	Homo sapiens	potential	Dehydrogenase/reductase SDR family member 7
A6NNS2	Homo sapiens	potential	Dehydrogenase/reductase SDR family member 7C
Q9BPW9	Homo sapiens	potential	Dehydrogenase/reductase SDR family member 9
Q8N5I4	Homo sapiens	potential	Dehydrogenase/reductase SDR family member on chromosome X
O60477	Homo sapiens	potential	Deleted in bladder cancer protein 1
Q9UGM3	Homo sapiens	potential	Deleted in malignant brain tumors 1 protein
Q8NFT8	Homo sapiens	potential	Delta and Notch-like epidermal growth factor-related receptor
O00548	Homo sapiens	potential	Delta-like protein 1
Q9NYJ7	Homo sapiens	potential	Delta-like protein 3
Q9NR61	Homo sapiens	confirmed	Delta-like protein 4
Q13316	Homo sapiens	potential	Dentin matrix acidic phosphoprotein 1
Q8IXL6	Homo sapiens	potential	Dentin matrix protein 4
Q9NZW4	Homo sapiens	potential	Dentin sialophosphoprotein
Q13609	Homo sapiens	by similarity	Deoxyribonuclease gamma
P24855	Homo sapiens	confirmed	Deoxyribonuclease-1
P49184	Homo sapiens	potential	Deoxyribonuclease-1-like 1
Q92874	Homo sapiens	potential	Deoxyribonuclease-1-like 2
O00115	Homo sapiens	potential	Deoxyribonuclease-2-alpha
Q8WZ79	Homo sapiens	potential	Deoxyribonuclease-2-beta
Q9UL01	Homo sapiens	potential	Dermatan-sulfate epimerase
Q8IZU8	Homo sapiens	potential	Dermatan-sulfate epimerase-like protein
Q07507	Homo sapiens	by similarity	Dermatopontin
P81605	Homo sapiens	confirmed	Dermcidin
Q6E0U4	Homo sapiens	confirmed	Dermokine
O43323	Homo sapiens	potential	Desert hedgehog protein
Q08554	Homo sapiens	potential	Desmocollin-1
Q02487	Homo sapiens	potential	Desmocollin-2
Q14574	Homo sapiens	potential	Desmocollin-3
Q8WWR7	Homo sapiens	potential	Desmoglein 2
Q02413	Homo sapiens	potential	Desmoglein-1
Q14126	Homo sapiens	potential	Desmoglein-2
P32926	Homo sapiens	potential	Desmoglein-3
Q86SJ6	Homo sapiens	potential	Desmoglein-4
Q9UK85	Homo sapiens	potential	Dickkopf-like protein 1
O94907	Homo sapiens	confirmed	Dickkopf-related protein 1
Q9UBU2	Homo sapiens	potential	Dickkopf-related protein 2
Q9UBP4	Homo sapiens	confirmed	Dickkopf-related protein 3
Q9UBT3	Homo sapiens	confirmed	Dickkopf-related protein 4
Q3MIW9	Homo sapiens	potential	Diffuse panbronchiolitis critical region protein 1
Q01459	Homo sapiens	by similarity	Di-N-acetylchitobiase
P16444	Homo sapiens	confirmed	Dipeptidase 1
Q9H4A9	Homo sapiens	potential	Dipeptidase 2
Q9H4B8	Homo sapiens	potential	Dipeptidase 3
P53634	Homo sapiens	confirmed	Dipeptidyl-peptidase 1
Q9UHL4	Homo sapiens	potential	Dipeptidyl-peptidase 2
Q16832	Homo sapiens	potential	Discoidin domain-containing receptor 2
Q8N8Z6	Homo sapiens	potential	Discoidin, CUB and LCCL domain-containing protein 1
Q96PD2	Homo sapiens	potential	Discoidin, CUB and LCCL domain-containing protein 2
Q99965	Homo sapiens	potential	Disintegrin and metalloproteinase domain-containing protein 2
Q9H2U9	Homo sapiens	potential	Disintegrin and metalloproteinase domain-containing protein 7
Q9UBS4	Homo sapiens	by similarity	DnaJ homolog subfamily B member 11
Q8IXB1	Homo sapiens	potential	DnaJ homolog subfamily C member 10
Q9Y2G8	Homo sapiens	potential	DnaJ homolog subfamily C member 16
Q13217	Homo sapiens	potential	DnaJ homolog subfamily C member 3
P39656	Homo sapiens	by similarity	Dolichyl-diphosphooligosaccharide--protein glycosyltransferase 48 kDa subunit
P04843	Homo sapiens	confirmed	Dolichyl-diphosphooligosaccharide--protein glycosyltransferase subunit 1
P04844	Homo sapiens	confirmed	Dolichyl-diphosphooligosaccharide--protein glycosyltransferase subunit 2
O60469	Homo sapiens	potential	Down syndrome cell adhesion molecule
Q8TD84	Homo sapiens	potential	Down syndrome cell adhesion molecule-like protein 1
Q9UBW6	Homo sapiens	potential	DR beta-3
Q9NRD9	Homo sapiens	potential	Dual oxidase 1
Q9NRD8	Homo sapiens	potential	Dual oxidase 2
Q5VV43	Homo sapiens	potential	Dyslexia-associated protein KIAA0319
Q14118	Homo sapiens	potential	Dystroglycan
Q9P2E8	Homo sapiens	potential	E3 ubiquitin-protein ligase MARCH4
Q8TEB7	Homo sapiens	potential	E3 ubiquitin-protein ligase RNF128
Q8NC42	Homo sapiens	potential	E3 ubiquitin-protein ligase RNF149
Q9H6Y7	Homo sapiens	potential	E3 ubiquitin-protein ligase RNF167
Q86TM6	Homo sapiens	potential	E3 ubiquitin-protein ligase synoviolin
Q14641	Homo sapiens	confirmed	Early placenta insulin-like peptide
Q13508	Homo sapiens	potential	Ecto-ADP-ribosyltransferase 3
Q93070	Homo sapiens	potential	Ecto-ADP-ribosyltransferase 4
Q96L15	Homo sapiens	potential	Ecto-ADP-ribosyltransferase 5
O75356	Homo sapiens	potential	Ectonucleoside triphosphate diphosphohydrolase 5
Q13822	Homo sapiens	by similarity	Ectonucleotide pyrophosphatase/phosphodiesterase family member 2
Q9Y6X5	Homo sapiens	potential	Ectonucleotide pyrophosphatase/phosphodiesterase family member 4
Q9UJA9	Homo sapiens	by similarity	Ectonucleotide pyrophosphatase/phosphodiesterase family member 5
Q6UWR7	Homo sapiens	potential	Ectonucleotide pyrophosphatase/phosphodiesterase family member 6
Q6UWV6	Homo sapiens	confirmed	Ectonucleotide pyrophosphatase/phosphodiesterase family member 7
Q9HBW9	Homo sapiens	potential	EGF, latrophilin and seven transmembrane domain-containing protein 1
Q12805	Homo sapiens	potential	EGF-containing fibulin-like extracellular matrix protein 1
O95967	Homo sapiens	potential	EGF-containing fibulin-like extracellular matrix protein 2
Q8IUX8	Homo sapiens	potential	EGF-like domain-containing protein 6
Q9UHF1	Homo sapiens	potential	EGF-like domain-containing protein 7
Q99944	Homo sapiens	confirmed	EGF-like domain-containing protein 8
Q14246	Homo sapiens	potential	EGF-like module-containing mucin-like hormone receptor-like 1
Q9UHX3	Homo sapiens	potential	EGF-like module-containing mucin-like hormone receptor-like 2
Q9BY15	Homo sapiens	potential	EGF-like module-containing mucin-like hormone receptor-like 3
O43854	Homo sapiens	potential	EGF-like repeat and discoidin I-like domain-containing protein 3
Q96AW1	Homo sapiens	potential	EGFR-coamplified and overexpressed protein
P19957	Homo sapiens	confirmed	Elafin
Q9UNI1	Homo sapiens	by similarity	Elastase-1
P08217	Homo sapiens	confirmed	Elastase-2A
P08218	Homo sapiens	confirmed	Elastase-2B
P09093	Homo sapiens	potential	Elastase-3A
P08861	Homo sapiens	potential	Elastase-3B
P15502	Homo sapiens	by similarity	Elastin
Q6PCB8	Homo sapiens	potential	Embigin
P27539	Homo sapiens	potential	Embryonic growth/differentiation factor 1
Q96A84	Homo sapiens	potential	EMI domain-containing protein 1
Q9Y6C2	Homo sapiens	potential	EMILIN-1
Q9BXX0	Homo sapiens	potential	EMILIN-2
Q9NT22	Homo sapiens	potential	EMILIN-3
Q9NRM1	Homo sapiens	potential	Enamelin
Q3V4E3	Homo sapiens	confirmed	Endocan
P17813	Homo sapiens	confirmed	Endoglin
Q9ULC0	Homo sapiens	potential	Endomucin
O94919	Homo sapiens	potential	Endonuclease domain-containing 1 protein
Q6YPB0	Homo sapiens	potential	Endoplasmic reticulum DnaJ/PDI fusion protein 3
Q71S60	Homo sapiens	potential	Endoplasmic reticulum DnaJ-PDI fusion protein 2
P30040	Homo sapiens	confirmed	Endoplasmic reticulum protein ERp29
Q96DN0	Homo sapiens	potential	Endoplasmic reticulum resident protein ERp27
P14625	Homo sapiens	confirmed	Endoplasmin
Q9HCU0	Homo sapiens	potential	Endosialin
Q14162	Homo sapiens	potential	Endothelial cells scavenger receptor
Q96AP7	Homo sapiens	confirmed	Endothelial cell-selective adhesion molecule
Q9NQ30	Homo sapiens	potential	Endothelial cell-specific molecule 1
Q9Y5X9	Homo sapiens	potential	Endothelial lipase
Q9UNN8	Homo sapiens	potential	Endothelial protein C receptor
P24530	Homo sapiens	potential	Endothelin B receptor
O60883	Homo sapiens	potential	Endothelin B receptor-like protein 2
P05305	Homo sapiens	confirmed	Endothelin-1
P25101	Homo sapiens	potential	Endothelin-1 receptor
P20800	Homo sapiens	potential	Endothelin-2
P14138	Homo sapiens	potential	Endothelin-3
P12724	Homo sapiens	confirmed	Eosinophil cationic protein
P11678	Homo sapiens	potential	Eosinophil peroxidase
P51671	Homo sapiens	confirmed	Eotaxin
P21709	Homo sapiens	potential	Ephrin type-A receptor 1
Q5JZY3	Homo sapiens	potential	Ephrin type-A receptor 10
P29317	Homo sapiens	potential	Ephrin type-A receptor 2
P29320	Homo sapiens	confirmed	Ephrin type-A receptor 3
P54764	Homo sapiens	potential	Ephrin type-A receptor 4
P54756	Homo sapiens	potential	Ephrin type-A receptor 5
Q9UF33	Homo sapiens	potential	Ephrin type-A receptor 6
Q15375	Homo sapiens	potential	Ephrin type-A receptor 7
P29322	Homo sapiens	potential	Ephrin type-A receptor 8
P54762	Homo sapiens	confirmed	Ephrin type-B receptor 1
P29323	Homo sapiens	potential	Ephrin type-B receptor 2
P54753	Homo sapiens	potential	Ephrin type-B receptor 3
P54760	Homo sapiens	potential	Ephrin type-B receptor 4
O15197	Homo sapiens	confirmed	Ephrin type-B receptor 6
P20827	Homo sapiens	confirmed	Ephrin-A1
O43921	Homo sapiens	potential	Ephrin-A2
P52797	Homo sapiens	potential	Ephrin-A3
P52798	Homo sapiens	confirmed	Ephrin-A4
P52803	Homo sapiens	potential	Ephrin-A5
P98172	Homo sapiens	confirmed	Ephrin-B1
P52799	Homo sapiens	potential	Ephrin-B2
Q15768	Homo sapiens	confirmed	Ephrin-B3
P00533	Homo sapiens	confirmed	Epidermal growth factor receptor
Q7RTY5	Homo sapiens	potential	Epidermis-specific serine protease-like protein
O75715	Homo sapiens	potential	Epididymal secretory glutathione peroxidase
P61916	Homo sapiens	potential	Epididymal secretory protein E1
Q14507	Homo sapiens	potential	Epididymal secretory protein E3-alpha
P56851	Homo sapiens	potential	Epididymal secretory protein E3-beta
Q96BH3	Homo sapiens	potential	Epididymal sperm-binding protein 1
Q6JVE6	Homo sapiens	potential	Epididymal-specific lipocalin-10
Q6JVE5	Homo sapiens	potential	Epididymal-specific lipocalin-12
P62502	Homo sapiens	potential	Epididymal-specific lipocalin-6
Q6JVE9	Homo sapiens	potential	Epididymal-specific lipocalin-8
Q8WX39	Homo sapiens	potential	Epididymal-specific lipocalin-9
Q9Y2E5	Homo sapiens	potential	Epididymis-specific alpha-mannosidase
Q6UW88	Homo sapiens	confirmed	Epigen
Q99645	Homo sapiens	potential	Epiphycan
P12830	Homo sapiens	potential	Epithelial cadherin
Q08345	Homo sapiens	potential	Epithelial discoidin domain-containing receptor 1
O95925	Homo sapiens	potential	Eppin
O43556	Homo sapiens	potential	Epsilon-sarcoglycan
Q9BV94	Homo sapiens	potential	ER degradation-enhancing alpha-mannosidase-like 2
Q9BZQ6	Homo sapiens	potential	ER degradation-enhancing alpha-mannosidase-like 3
Q96HE7	Homo sapiens	confirmed	ERO1-like protein alpha
Q86YB8	Homo sapiens	potential	ERO1-like protein beta
Q96PL5	Homo sapiens	potential	Erythroid membrane-associated protein
P01588	Homo sapiens	confirmed	Erythropoietin
P19235	Homo sapiens	confirmed	Erythropoietin receptor
P16581	Homo sapiens	confirmed	E-selectin
Q8NBQ5	Homo sapiens	potential	Estradiol 17-beta-dehydrogenase 11
Q9NZJ5	Homo sapiens	potential	Eukaryotic translation initiation factor 2-alpha kinase 3
P41180	Homo sapiens	potential	Extracellular calcium-sensing receptor
Q9GZZ8	Homo sapiens	potential	Extracellular glycoprotein lacritin
P0C7U0	Homo sapiens	potential	Extracellular leucine-rich repeat and fibronectin type-III domain-containing protein 1
Q16610	Homo sapiens	by similarity	Extracellular matrix protein 1
O94769	Homo sapiens	potential	Extracellular matrix protein 2
Q86XX4	Homo sapiens	potential	Extracellular matrix protein FRAS1
Q8IWU6	Homo sapiens	potential	Extracellular sulfatase Sulf-1
Q8IWU5	Homo sapiens	potential	Extracellular sulfatase Sulf-2
P08294	Homo sapiens	confirmed	Extracellular superoxide dismutase [Cu-Zn]
Q15253	Homo sapiens	potential	F2 protein
Q8IWF2	Homo sapiens	potential	FAD-dependent oxidoreductase domain-containing protein 2
O60667	Homo sapiens	potential	Fas apoptotic inhibitory molecule 3
Q7L513	Homo sapiens	confirmed	Fc receptor-like A
Q6BAA4	Homo sapiens	potential	Fc receptor-like B
Q96LA6	Homo sapiens	potential	Fc receptor-like protein 1
Q96LA5	Homo sapiens	confirmed	Fc receptor-like protein 2
Q96P31	Homo sapiens	potential	Fc receptor-like protein 3
Q96PJ5	Homo sapiens	potential	Fc receptor-like protein 4
Q96RD9	Homo sapiens	potential	Fc receptor-like protein 5
Q6DN72	Homo sapiens	potential	Fc receptor-like protein 6
Q9UGM5	Homo sapiens	potential	Fetuin-B
P35555	Homo sapiens	potential	Fibrillin-1
P35556	Homo sapiens	potential	Fibrillin-2
Q75N90	Homo sapiens	potential	Fibrillin-3
P02671	Homo sapiens	confirmed	Fibrinogen alpha chain
P02675	Homo sapiens	confirmed	Fibrinogen beta chain
P02679	Homo sapiens	confirmed	Fibrinogen gamma chain
Q08830	Homo sapiens	confirmed	Fibrinogen-like protein 1
O15520	Homo sapiens	potential	Fibroblast growth factor 10
O60258	Homo sapiens	potential	Fibroblast growth factor 17
O76093	Homo sapiens	potential	Fibroblast growth factor 18
O95750	Homo sapiens	confirmed	Fibroblast growth factor 19
Q9NSA1	Homo sapiens	confirmed	Fibroblast growth factor 21
Q9HCT0	Homo sapiens	potential	Fibroblast growth factor 22
Q9GZV9	Homo sapiens	confirmed	Fibroblast growth factor 23
P08620	Homo sapiens	potential	Fibroblast growth factor 4
P12034	Homo sapiens	potential	Fibroblast growth factor 5
P10767	Homo sapiens	potential	Fibroblast growth factor 6
P55075	Homo sapiens	potential	Fibroblast growth factor 8
P21802	Homo sapiens	potential	Fibroblast growth factor receptor 2
P22607	Homo sapiens	confirmed	Fibroblast growth factor receptor 3
P22455	Homo sapiens	confirmed	Fibroblast growth factor receptor 4
Q8N441	Homo sapiens	confirmed	Fibroblast growth factor receptor-like 1
Q14512	Homo sapiens	potential	Fibroblast growth factor-binding protein 1
Q9BYJ0	Homo sapiens	potential	Fibroblast growth factor-binding protein 2
Q8TAT2	Homo sapiens	potential	Fibroblast growth factor-binding protein 3
Q8TCZ9	Homo sapiens	potential	Fibrocystin
Q86WI1	Homo sapiens	potential	Fibrocystin-L
Q14314	Homo sapiens	potential	Fibroleukin
Q06828	Homo sapiens	by similarity	Fibromodulin
P02751	Homo sapiens	confirmed	Fibronectin
Q4ZHG4	Homo sapiens	potential	Fibronectin type III domain-containing protein 1
Q9H6D8	Homo sapiens	potential	Fibronectin type III domain-containing protein 4
Q8NAU1	Homo sapiens	potential	Fibronectin type III domain-containing protein 5
Q5VTL7	Homo sapiens	potential	Fibronectin type III domain-containing protein 7
Q8TB73	Homo sapiens	potential	Fibronectin type-III domain-containing protein C4orf31
P23142	Homo sapiens	confirmed	Fibulin-1
P98095	Homo sapiens	potential	Fibulin-2
Q9UBX5	Homo sapiens	potential	Fibulin-5
Q53RD9	Homo sapiens	potential	Fibulin-7
O00602	Homo sapiens	confirmed	Ficolin-1
Q15485	Homo sapiens	potential	Ficolin-2
O75636	Homo sapiens	confirmed	Ficolin-3
Q8TAL6	Homo sapiens	potential	Fin bud initiation factor homolog
Q96AY3	Homo sapiens	potential	FK506-binding protein 10
Q9NYL4	Homo sapiens	potential	FK506-binding protein 11
Q9NWM8	Homo sapiens	confirmed	FK506-binding protein 14
P26885	Homo sapiens	confirmed	FK506-binding protein 2
Q9Y680	Homo sapiens	potential	FK506-binding protein 7
O95302	Homo sapiens	potential	FK506-binding protein 9
P36888	Homo sapiens	potential	FL cytokine receptor
P15328	Homo sapiens	potential	Folate receptor alpha
P14207	Homo sapiens	confirmed	Folate receptor beta
P41439	Homo sapiens	potential	Folate receptor gamma
P23945	Homo sapiens	potential	Follicle-stimulating hormone receptor
Q8NFU4	Homo sapiens	potential	Follicular dendritic cell secreted peptide
P19883	Homo sapiens	confirmed	Follistatin
Q12841	Homo sapiens	confirmed	Follistatin-related protein 1
O95633	Homo sapiens	confirmed	Follistatin-related protein 3
Q6MZW2	Homo sapiens	potential	Follistatin-related protein 4
Q8N475	Homo sapiens	potential	Follistatin-related protein 5
P01225	Homo sapiens	confirmed	Follitropin subunit beta
Q86VR8	Homo sapiens	potential	Four-jointed box protein 1
Q53YU7	Homo sapiens	potential	Foveolin
P78423	Homo sapiens	confirmed	Fractalkine
Q5H8C1	Homo sapiens	potential	FRAS1-related extracellular matrix protein 1
Q5SZK8	Homo sapiens	potential	FRAS1-related extracellular matrix protein 2
P0C091	Homo sapiens	potential	FRAS1-related extracellular matrix protein 3
Q9UP38	Homo sapiens	potential	Frizzled-1
Q9ULW2	Homo sapiens	potential	Frizzled-10
Q14332	Homo sapiens	potential	Frizzled-2
Q9NPG1	Homo sapiens	confirmed	Frizzled-3
Q9ULV1	Homo sapiens	potential	Frizzled-4
Q13467	Homo sapiens	potential	Frizzled-5
O60353	Homo sapiens	potential	Frizzled-6
O75084	Homo sapiens	potential	Frizzled-7
Q9H461	Homo sapiens	potential	Frizzled-8
O00144	Homo sapiens	potential	Frizzled-9
P09958	Homo sapiens	potential	Furin
Q14802	Homo sapiens	potential	FXYD domain-containing ion transport regulator 3
P59646	Homo sapiens	potential	FXYD domain-containing ion transport regulator 4
Q96DB9	Homo sapiens	potential	FXYD domain-containing ion transport regulator 5
Q9H0Q3	Homo sapiens	potential	FXYD domain-containing ion transport regulator 6
P58550	Homo sapiens	potential	FXYD domain-containing ion transport regulator 8
P54803	Homo sapiens	confirmed	Galactocerebrosidase
Q13540	Homo sapiens	potential	Galactosyltransferase activator.
P22466	Homo sapiens	potential	Galanin
Q9UBC7	Homo sapiens	by similarity	Galanin-like peptide
Q08380	Homo sapiens	confirmed	Galectin-3-binding protein
P14867	Homo sapiens	potential	Gamma-aminobutyric acid receptor subunit alpha-1
P47869	Homo sapiens	potential	Gamma-aminobutyric acid receptor subunit alpha-2
P34903	Homo sapiens	potential	Gamma-aminobutyric acid receptor subunit alpha-3
P48169	Homo sapiens	potential	Gamma-aminobutyric acid receptor subunit alpha-4
P31644	Homo sapiens	potential	Gamma-aminobutyric acid receptor subunit alpha-5
Q16445	Homo sapiens	potential	Gamma-aminobutyric acid receptor subunit alpha-6
P18505	Homo sapiens	potential	Gamma-aminobutyric acid receptor subunit beta-1
P47870	Homo sapiens	by similarity	Gamma-aminobutyric acid receptor subunit beta-2
P28472	Homo sapiens	potential	Gamma-aminobutyric acid receptor subunit beta-3
O14764	Homo sapiens	potential	Gamma-aminobutyric acid receptor subunit delta
P78334	Homo sapiens	potential	Gamma-aminobutyric acid receptor subunit epsilon
Q8N1C3	Homo sapiens	potential	Gamma-aminobutyric acid receptor subunit gamma-1
P18507	Homo sapiens	potential	Gamma-aminobutyric acid receptor subunit gamma-2
Q99928	Homo sapiens	potential	Gamma-aminobutyric acid receptor subunit gamma-3
O00591	Homo sapiens	potential	Gamma-aminobutyric acid receptor subunit pi
P24046	Homo sapiens	potential	Gamma-aminobutyric acid receptor subunit rho-1
P28476	Homo sapiens	potential	Gamma-aminobutyric acid receptor subunit rho-2
A8MPY1	Homo sapiens	potential	Gamma-aminobutyric acid receptor subunit rho-3
Q9UN88	Homo sapiens	potential	Gamma-aminobutyric acid receptor subunit theta
Q9UBS5	Homo sapiens	potential	Gamma-aminobutyric acid type B receptor subunit 1
O75899	Homo sapiens	potential	Gamma-aminobutyric acid type B receptor subunit 2
Q92820	Homo sapiens	by similarity	Gamma-glutamyl hydrolase
P13284	Homo sapiens	potential	Gamma-interferon-inducible lysosomal thiol reductase
P07288	Homo sapiens	confirmed	Gamma-seminoprotein
P17900	Homo sapiens	potential	Ganglioside GM2 activator
P09681	Homo sapiens	potential	Gastric inhibitory polypeptide
P48546	Homo sapiens	potential	Gastric inhibitory polypeptide receptor
P27352	Homo sapiens	potential	Gastric intrinsic factor
P07098	Homo sapiens	confirmed	Gastric triacylglycerol lipase
P20142	Homo sapiens	confirmed	Gastricsin
P01350	Homo sapiens	confirmed	Gastrin
P07492	Homo sapiens	confirmed	Gastrin-releasing peptide
Q9NS71	Homo sapiens	by similarity	Gastrokine-1
Q86XP6	Homo sapiens	potential	Gastrokine-2
O95479	Homo sapiens	by similarity	GDH/6PGL endoplasmic bifunctional protein
P56159	Homo sapiens	potential	GDNF family receptor alpha-1
O00451	Homo sapiens	potential	GDNF family receptor alpha-2
O60609	Homo sapiens	confirmed	GDNF family receptor alpha-3
Q9GZZ7	Homo sapiens	potential	GDNF family receptor alpha-4
Q6UXV0	Homo sapiens	potential	GDNF family receptor alpha-like
Q9H488	Homo sapiens	potential	GDP-fucose protein O-fucosyltransferase 1
Q9Y2G5	Homo sapiens	potential	GDP-fucose protein O-fucosyltransferase 2
P06396	Homo sapiens	confirmed	Gelsolin
Q8N2G8	Homo sapiens	potential	GH3 domain-containing protein
P07093	Homo sapiens	confirmed	Glia-derived nexin
P39905	Homo sapiens	potential	Glial cell line-derived neurotrophic factor
P48060	Homo sapiens	potential	Glioma pathogenesis-related protein 1
Q6UWM5	Homo sapiens	confirmed	GLIPR1-like protein 1
P01275	Homo sapiens	confirmed	Glucagon
P47871	Homo sapiens	potential	Glucagon receptor
P43220	Homo sapiens	potential	Glucagon-like peptide 1 receptor
Q9NXC2	Homo sapiens	potential	Glucose-fructose oxidoreductase domain-containing protein 1
Q3B7J2	Homo sapiens	potential	Glucose-fructose oxidoreductase domain-containing protein 2
P14314	Homo sapiens	confirmed	Glucosidase 2 subunit beta
P04062	Homo sapiens	confirmed	Glucosylceramidase
Q8TCU5	Homo sapiens	potential	Glutamate [NMDA] receptor subunit 3A
O60391	Homo sapiens	potential	Glutamate [NMDA] receptor subunit 3B
Q12879	Homo sapiens	potential	Glutamate [NMDA] receptor subunit epsilon-1
Q13224	Homo sapiens	potential	Glutamate [NMDA] receptor subunit epsilon-2
Q14957	Homo sapiens	potential	Glutamate [NMDA] receptor subunit epsilon-3
O15399	Homo sapiens	potential	Glutamate [NMDA] receptor subunit epsilon-4
Q05586	Homo sapiens	potential	Glutamate [NMDA] receptor subunit zeta-1
P42261	Homo sapiens	potential	Glutamate receptor 1
P42262	Homo sapiens	potential	Glutamate receptor 2
P42263	Homo sapiens	potential	Glutamate receptor 3
P48058	Homo sapiens	potential	Glutamate receptor 4
Q9ULK0	Homo sapiens	potential	Glutamate receptor delta-1 subunit
O43424	Homo sapiens	potential	Glutamate receptor delta-2 subunit
P39086	Homo sapiens	potential	Glutamate receptor, ionotropic kainate 1
Q13002	Homo sapiens	potential	Glutamate receptor, ionotropic kainate 2
Q13003	Homo sapiens	potential	Glutamate receptor, ionotropic kainate 3
Q16099	Homo sapiens	potential	Glutamate receptor, ionotropic kainate 4
Q16478	Homo sapiens	potential	Glutamate receptor, ionotropic kainate 5
Q16769	Homo sapiens	potential	Glutaminyl-peptide cyclotransferase
P22352	Homo sapiens	potential	Glutathione peroxidase 3
P59796	Homo sapiens	potential	Glutathione peroxidase 6
Q96SL4	Homo sapiens	potential	Glutathione peroxidase 7
P23415	Homo sapiens	potential	Glycine receptor subunit alpha-1
P23416	Homo sapiens	potential	Glycine receptor subunit alpha-2
O75311	Homo sapiens	potential	Glycine receptor subunit alpha-3
Q5JXX5	Homo sapiens	potential	Glycine receptor subunit alpha-4
P48167	Homo sapiens	by similarity	Glycine receptor subunit beta
P09466	Homo sapiens	confirmed	Glycodelin
Q03870	Homo sapiens	potential	Glycophorin Erik
Q14440	Homo sapiens	potential	Glycophorin Erik
Q13030	Homo sapiens	potential	Glycophorin Erik I-IV
P02724	Homo sapiens	confirmed	Glycophorin-A
P06028	Homo sapiens	confirmed	Glycophorin-B
P15421	Homo sapiens	confirmed	Glycophorin-E
A8MT96	Homo sapiens	by similarity	Glycoprotein 25L
Q96T91	Homo sapiens	potential	Glycoprotein hormone alpha-2
Q86YW7	Homo sapiens	potential	Glycoprotein hormone beta-5
P01215	Homo sapiens	confirmed	Glycoprotein hormones alpha chain
P55808	Homo sapiens	potential	Glycoprotein Xg
Q8IV16	Homo sapiens	potential	Glycosylphosphatidylinositol-anchored high density lipoprotein-binding protein 1
Q99445	Homo sapiens	potential	Glycosyl-phosphatidylinositol-anchored molecule-like protein
Q96MS3	Homo sapiens	potential	Glycosyltransferase 1 domain-containing protein 1
Q8NBJ5	Homo sapiens	potential	Glycosyltransferase 25 family member 1
Q8IYK4	Homo sapiens	potential	Glycosyltransferase 25 family member 2
Q5T4B2	Homo sapiens	potential	Glycosyltransferase 25 family member 3
A6NG13	Homo sapiens	potential	Glycosyltransferase 54 domain-containing protein
P35052	Homo sapiens	confirmed	Glypican-1
Q8N158	Homo sapiens	potential	Glypican-2
P51654	Homo sapiens	potential	Glypican-3
O75487	Homo sapiens	potential	Glypican-4
P78333	Homo sapiens	potential	Glypican-5
Q9Y625	Homo sapiens	potential	Glypican-6
Q92896	Homo sapiens	potential	Golgi apparatus protein 1
Q86XS8	Homo sapiens	potential	Goliath homolog
Q969N2	Homo sapiens	confirmed	GPI transamidase component PIG-T
Q92643	Homo sapiens	confirmed	GPI-anchor transamidase
P52961	Homo sapiens	potential	GPI-linked NAD(P)(+)--arginine ADP-ribosyltransferase 1
Q9Y653	Homo sapiens	confirmed	G-protein coupled receptor 56
Q8IZP9	Homo sapiens	potential	G-protein coupled receptor 64
Q8WXG9	Homo sapiens	potential	G-protein coupled receptor 98
Q9NZH0	Homo sapiens	potential	G-protein coupled receptor family C group 5 member B
Q9NQ84	Homo sapiens	potential	G-protein coupled receptor family C group 5 member C
Q5T6X5	Homo sapiens	potential	G-protein coupled receptor family C group 6 member A
P28799	Homo sapiens	potential	Granulins
P09919	Homo sapiens	probable	Granulocyte colony-stimulating factor
Q99062	Homo sapiens	confirmed	Granulocyte colony-stimulating factor receptor
P04141	Homo sapiens	confirmed	Granulocyte-macrophage colony-stimulating factor
P15509	Homo sapiens	confirmed	Granulocyte-macrophage colony-stimulating factor receptor subunit alpha
P22749	Homo sapiens	potential	Granulysin
P12544	Homo sapiens	confirmed	Granzyme A
P10144	Homo sapiens	confirmed	Granzyme B
P20718	Homo sapiens	confirmed	Granzyme H
P49863	Homo sapiens	potential	Granzyme K
P51124	Homo sapiens	potential	Granzyme M
O60565	Homo sapiens	confirmed	Gremlin-1
Q9H772	Homo sapiens	potential	Gremlin-2
O15496	Homo sapiens	potential	Group 10 secretory phospholipase A2
Q9NZ20	Homo sapiens	potential	Group 3 secretory phospholipase A2
Q9UNK4	Homo sapiens	potential	Group IID secretory phospholipase A2
Q9NZK7	Homo sapiens	potential	Group IIE secretory phospholipase A2
Q9BZM2	Homo sapiens	potential	Group IIF secretory phospholipase A2
Q9BZM1	Homo sapiens	probable	Group XIIA secretory phospholipase A2
Q9BX93	Homo sapiens	confirmed	Group XIIB secretory phospholipase A2-like protein
P54826	Homo sapiens	potential	Growth arrest-specific protein 1
Q14393	Homo sapiens	potential	Growth arrest-specific protein 6
P10912	Homo sapiens	potential	Growth hormone receptor
P01242	Homo sapiens	confirmed	Growth hormone variant
Q02643	Homo sapiens	potential	Growth hormone-releasing hormone receptor
O95390	Homo sapiens	potential	Growth/differentiation factor 11
Q99988	Homo sapiens	potential	Growth/differentiation factor 15
Q9UK05	Homo sapiens	potential	Growth/differentiation factor 2
Q9NR23	Homo sapiens	potential	Growth/differentiation factor 3
P43026	Homo sapiens	potential	Growth/differentiation factor 5
Q6KF10	Homo sapiens	potential	Growth/differentiation factor 6
Q7Z4P5	Homo sapiens	potential	Growth/differentiation factor 7
O14793	Homo sapiens	potential	Growth/differentiation factor 8
O60383	Homo sapiens	potential	Growth/differentiation factor 9
P09341	Homo sapiens	confirmed	Growth-regulated alpha protein
Q16661	Homo sapiens	potential	Guanylate cyclase activator 2B
Q02747	Homo sapiens	confirmed	Guanylin
P00738	Homo sapiens	confirmed	Haptoglobin
P00739	Homo sapiens	potential	Haptoglobin-related protein
Q6PJG6	Homo sapiens	potential	HEAT repeat-containing protein C7orf27
P48723	Homo sapiens	potential	Heat shock 70 kDa protein 13
P25092	Homo sapiens	potential	Heat-stable enterotoxin receptor
Q96QV1	Homo sapiens	potential	Hedgehog-interacting protein
Q9UBK5	Homo sapiens	potential	Hematopoietic cell signal transducer
P28906	Homo sapiens	confirmed	Hematopoietic progenitor cell antigen CD34
Q96RW7	Homo sapiens	potential	Hemicentin-1
Q6ZVN8	Homo sapiens	potential	Hemojuvelin
P02790	Homo sapiens	confirmed	Hemopexin
A8MVW5	Homo sapiens	potential	HEPACAM family member 2
O14792	Homo sapiens	by similarity	Heparan sulfate glucosamine 3-O-sulfotransferase 1
Q9Y251	Homo sapiens	confirmed	Heparanase
P05546	Homo sapiens	confirmed	Heparin cofactor 2
P11150	Homo sapiens	confirmed	Hepatic triacylglycerol lipase
Q96D42	Homo sapiens	potential	Hepatitis A virus cellular receptor 1
Q8TDQ0	Homo sapiens	potential	Hepatitis A virus cellular receptor 2
Q6UXH0	Homo sapiens	potential	Hepatocellular carcinoma-associated protein TD26
Q14CZ8	Homo sapiens	potential	Hepatocyte cell adhesion molecule
P14210	Homo sapiens	confirmed	Hepatocyte growth factor
Q04756	Homo sapiens	confirmed	Hepatocyte growth factor activator
P08581	Homo sapiens	potential	Hepatocyte growth factor receptor
P26927	Homo sapiens	potential	Hepatocyte growth factor-like protein
P81172	Homo sapiens	potential	Hepcidin
Q9BQS7	Homo sapiens	potential	Hephaestin
Q6MZM0	Homo sapiens	potential	Hephaestin-like protein 1
Q30201	Homo sapiens	confirmed	Hereditary hemochromatosis protein
P60507	Homo sapiens	potential	HERV-F(c)1_Xq21.33 provirus ancestral Env polyprotein
P60508	Homo sapiens	potential	HERV-FRD_6p24.1 provirus ancestral Env polyprotein
P61549	Homo sapiens	potential	HERV-H_19p13.11 provirus ancestral Env polyprotein
Q96L62	Homo sapiens	potential	HERV-H_1q41 provirus ancestral Env polyprotein
Q9N2J8	Homo sapiens	potential	HERV-H_2q24.1 provirus ancestral Env polyprotein
Q9N2K0	Homo sapiens	potential	HERV-H_2q24.3 provirus ancestral Env polyprotein
Q9N2J9	Homo sapiens	potential	HERV-H_3q26 provirus ancestral Env polyprotein
P61569	Homo sapiens	potential	HERV-K_10p14 provirus ancestral Env polyprotein
P61570	Homo sapiens	potential	HERV-K_11q22.1 provirus ancestral Env polyprotein
P61565	Homo sapiens	potential	HERV-K_12q14.1 provirus ancestral Env polyprotein
Q902F9	Homo sapiens	potential	HERV-K_19p13.11 provirus ancestral Env polyprotein
O71037	Homo sapiens	potential	HERV-K_19q12 provirus ancestral Env polyprotein
Q6ZVY0	Homo sapiens	potential	HERV-K_4p16.1 provirus ancestral Env polyprotein
Q9UKH3	Homo sapiens	potential	HERV-K_6q14.1 provirus ancestral Env polyprotein
Q69384	Homo sapiens	potential	HERV-K_7p22.1 provirus ancestral Env polyprotein
Q902F8	Homo sapiens	potential	HERV-K_8p23.1 provirus ancestral Env polyprotein
P60509	Homo sapiens	potential	HERV-R(b)_3p24.3 provirus ancestral Env polyprotein
Q14264	Homo sapiens	potential	HERV-R_7q21.2 provirus ancestral Env polyprotein
P61550	Homo sapiens	potential	HERV-T_19q13.11 provirus ancestral Env polyprotein
Q9UQF0	Homo sapiens	potential	HERV-W_7q21.2 provirus ancestral Env polyprotein
Q96JK4	Homo sapiens	potential	HHIP-like protein 1
Q6UWX4	Homo sapiens	potential	HHIP-like protein 2
Q8WWV6	Homo sapiens	potential	High affinity immunoglobulin alpha and immunoglobulin mu Fc receptor
P12319	Homo sapiens	confirmed	High affinity immunoglobulin epsilon receptor subunit alpha
P30273	Homo sapiens	potential	High affinity immunoglobulin epsilon receptor subunit gamma
P12314	Homo sapiens	confirmed	High affinity immunoglobulin gamma Fc receptor I
Q92637	Homo sapiens	potential	High affinity immunoglobulin gamma Fc receptor IB
P04629	Homo sapiens	potential	High affinity nerve growth factor receptor
P15515	Homo sapiens	confirmed	Histatin-1
P15516	Homo sapiens	confirmed	Histatin-3
Q9BX68	Homo sapiens	potential	Histidine triad nucleotide-binding protein 2
P04196	Homo sapiens	confirmed	Histidine-rich glycoprotein
P30443	Homo sapiens	confirmed	HLA class I histocompatibility antigen, A-1 alpha chain
P13746	Homo sapiens	confirmed	HLA class I histocompatibility antigen, A-11 alpha chain
P01892	Homo sapiens	confirmed	HLA class I histocompatibility antigen, A-2 alpha chain
P30447	Homo sapiens	confirmed	HLA class I histocompatibility antigen, A-23 alpha chain
P05534	Homo sapiens	confirmed	HLA class I histocompatibility antigen, A-24 alpha chain
P18462	Homo sapiens	confirmed	HLA class I histocompatibility antigen, A-25 alpha chain
P30450	Homo sapiens	confirmed	HLA class I histocompatibility antigen, A-26 alpha chain
P30512	Homo sapiens	confirmed	HLA class I histocompatibility antigen, A-29 alpha chain
P04439	Homo sapiens	confirmed	HLA class I histocompatibility antigen, A-3 alpha chain
P16188	Homo sapiens	confirmed	HLA class I histocompatibility antigen, A-30 alpha chain
P16189	Homo sapiens	confirmed	HLA class I histocompatibility antigen, A-31 alpha chain
P10314	Homo sapiens	confirmed	HLA class I histocompatibility antigen, A-32 alpha chain
P16190	Homo sapiens	confirmed	HLA class I histocompatibility antigen, A-33 alpha chain
P30453	Homo sapiens	confirmed	HLA class I histocompatibility antigen, A-34 alpha chain
P30455	Homo sapiens	confirmed	HLA class I histocompatibility antigen, A-36 alpha chain
P30456	Homo sapiens	confirmed	HLA class I histocompatibility antigen, A-43 alpha chain
P30457	Homo sapiens	confirmed	HLA class I histocompatibility antigen, A-66 alpha chain
P01891	Homo sapiens	confirmed	HLA class I histocompatibility antigen, A-68 alpha chain
P30459	Homo sapiens	confirmed	HLA class I histocompatibility antigen, A-74 alpha chain
Q09160	Homo sapiens	confirmed	HLA class I histocompatibility antigen, A-80 alpha chain
P13747	Homo sapiens	confirmed	HLA class I histocompatibility antigen, alpha chain E
P30511	Homo sapiens	confirmed	HLA class I histocompatibility antigen, alpha chain F
P17693	Homo sapiens	potential	HLA class I histocompatibility antigen, alpha chain G
P30461	Homo sapiens	confirmed	HLA class I histocompatibility antigen, B-13 alpha chain
P30462	Homo sapiens	confirmed	HLA class I histocompatibility antigen, B-14 alpha chain
P30464	Homo sapiens	confirmed	HLA class I histocompatibility antigen, B-15 alpha chain
P30466	Homo sapiens	confirmed	HLA class I histocompatibility antigen, B-18 alpha chain
P03989	Homo sapiens	confirmed	HLA class I histocompatibility antigen, B-27 alpha chain
P30685	Homo sapiens	confirmed	HLA class I histocompatibility antigen, B-35 alpha chain
P18463	Homo sapiens	confirmed	HLA class I histocompatibility antigen, B-37 alpha chain
Q95365	Homo sapiens	confirmed	HLA class I histocompatibility antigen, B-38 alpha chain
P30475	Homo sapiens	confirmed	HLA class I histocompatibility antigen, B-39 alpha chain
Q04826	Homo sapiens	confirmed	HLA class I histocompatibility antigen, B-40 alpha chain
P30479	Homo sapiens	confirmed	HLA class I histocompatibility antigen, B-41 alpha chain
P30480	Homo sapiens	confirmed	HLA class I histocompatibility antigen, B-42 alpha chain
P30481	Homo sapiens	confirmed	HLA class I histocompatibility antigen, B-44 alpha chain
P30483	Homo sapiens	confirmed	HLA class I histocompatibility antigen, B-45 alpha chain
P30484	Homo sapiens	confirmed	HLA class I histocompatibility antigen, B-46 alpha chain
P30485	Homo sapiens	confirmed	HLA class I histocompatibility antigen, B-47 alpha chain
P30486	Homo sapiens	confirmed	HLA class I histocompatibility antigen, B-48 alpha chain
P30487	Homo sapiens	confirmed	HLA class I histocompatibility antigen, B-49 alpha chain
P30488	Homo sapiens	confirmed	HLA class I histocompatibility antigen, B-50 alpha chain
P18464	Homo sapiens	confirmed	HLA class I histocompatibility antigen, B-51 alpha chain
P30490	Homo sapiens	confirmed	HLA class I histocompatibility antigen, B-52 alpha chain
P30491	Homo sapiens	confirmed	HLA class I histocompatibility antigen, B-53 alpha chain
P30492	Homo sapiens	confirmed	HLA class I histocompatibility antigen, B-54 alpha chain
P30493	Homo sapiens	confirmed	HLA class I histocompatibility antigen, B-55 alpha chain
P30495	Homo sapiens	confirmed	HLA class I histocompatibility antigen, B-56 alpha chain
P18465	Homo sapiens	confirmed	HLA class I histocompatibility antigen, B-57 alpha chain
P10319	Homo sapiens	confirmed	HLA class I histocompatibility antigen, B-58 alpha chain
Q29940	Homo sapiens	confirmed	HLA class I histocompatibility antigen, B-59 alpha chain
Q29836	Homo sapiens	confirmed	HLA class I histocompatibility antigen, B-67 alpha chain
P01889	Homo sapiens	confirmed	HLA class I histocompatibility antigen, B-7 alpha chain
Q31612	Homo sapiens	confirmed	HLA class I histocompatibility antigen, B-73 alpha chain
P30498	Homo sapiens	confirmed	HLA class I histocompatibility antigen, B-78 alpha chain
P30460	Homo sapiens	confirmed	HLA class I histocompatibility antigen, B-8 alpha chain
Q31610	Homo sapiens	confirmed	HLA class I histocompatibility antigen, B-81 alpha chain
Q29718	Homo sapiens	confirmed	HLA class I histocompatibility antigen, B-82 alpha chain
P30499	Homo sapiens	confirmed	HLA class I histocompatibility antigen, Cw-1 alpha chain
P30508	Homo sapiens	confirmed	HLA class I histocompatibility antigen, Cw-12 alpha chain
P30510	Homo sapiens	confirmed	HLA class I histocompatibility antigen, Cw-14 alpha chain
Q07000	Homo sapiens	confirmed	HLA class I histocompatibility antigen, Cw-15 alpha chain
Q29960	Homo sapiens	confirmed	HLA class I histocompatibility antigen, Cw-16 alpha chain
Q95604	Homo sapiens	confirmed	HLA class I histocompatibility antigen, Cw-17 alpha chain
Q29865	Homo sapiens	confirmed	HLA class I histocompatibility antigen, Cw-18 alpha chain
P30501	Homo sapiens	confirmed	HLA class I histocompatibility antigen, Cw-2 alpha chain
P04222	Homo sapiens	confirmed	HLA class I histocompatibility antigen, Cw-3 alpha chain
P30504	Homo sapiens	confirmed	HLA class I histocompatibility antigen, Cw-4 alpha chain
Q9TNN7	Homo sapiens	confirmed	HLA class I histocompatibility antigen, Cw-5 alpha chain
Q29963	Homo sapiens	confirmed	HLA class I histocompatibility antigen, Cw-6 alpha chain
P10321	Homo sapiens	confirmed	HLA class I histocompatibility antigen, Cw-7 alpha chain
P30505	Homo sapiens	confirmed	HLA class I histocompatibility antigen, Cw-8 alpha chain
Q29890	Homo sapiens	potential	HLA class II DR-beta (HLA-DR B)
P28067	Homo sapiens	potential	HLA class II histocompatibility antigen, DM alpha chain
P28068	Homo sapiens	potential	HLA class II histocompatibility antigen, DM beta chain
P06340	Homo sapiens	potential	HLA class II histocompatibility antigen, DO alpha chain
P13765	Homo sapiens	confirmed	HLA class II histocompatibility antigen, DO beta chain
P20036	Homo sapiens	confirmed	HLA class II histocompatibility antigen, DP alpha chain
O19749	Homo sapiens	potential	HLA class II histocompatibility antigen, DP beta 1 chain
P13763	Homo sapiens	confirmed	HLA class II histocompatibility antigen, DP(W2) beta chain
P04440	Homo sapiens	confirmed	HLA class II histocompatibility antigen, DP(W4) beta chain
P01920	Homo sapiens	potential	HLA class II histocompatibility antigen, DQ beta 1 chain
P01908	Homo sapiens	confirmed	HLA class II histocompatibility antigen, DQ(1) alpha chain
P01918	Homo sapiens	confirmed	HLA class II histocompatibility antigen, DQ(1) beta chain
P04226	Homo sapiens	confirmed	HLA class II histocompatibility antigen, DQ(2) alpha chain
P01909	Homo sapiens	confirmed	HLA class II histocompatibility antigen, DQ(3) alpha chain
P01920	Homo sapiens	confirmed	HLA class II histocompatibility antigen, DQ(3) beta chain
P04225	Homo sapiens	confirmed	HLA class II histocompatibility antigen, DQ(4) alpha chain
P01907	Homo sapiens	confirmed	HLA class II histocompatibility antigen, DQ(5) alpha chain
P01906	Homo sapiens	confirmed	HLA class II histocompatibility antigen, DQ(6) alpha chain
P01919	Homo sapiens	confirmed	HLA class II histocompatibility antigen, DQ(W1.1) beta chain
P05536	Homo sapiens	confirmed	HLA class II histocompatibility antigen, DQ(W3) alpha chain
P05537	Homo sapiens	confirmed	HLA class II histocompatibility antigen, DQ(W3) beta chain
P03992	Homo sapiens	confirmed	HLA class II histocompatibility antigen, DQB1*0602 beta chain
P01903	Homo sapiens	confirmed	HLA class II histocompatibility antigen, DR alpha chain
P13762	Homo sapiens	potential	HLA class II histocompatibility antigen, DR beta 4 chain
P01912	Homo sapiens	confirmed	HLA class II histocompatibility antigen, DR-1 beta chain
P01914	Homo sapiens	confirmed	HLA class II histocompatibility antigen, DR-1 beta chain
P04229	Homo sapiens	confirmed	HLA class II histocompatibility antigen, DRB1-1 beta chain
Q30167	Homo sapiens	confirmed	HLA class II histocompatibility antigen, DRB1-10 beta chain
P20039	Homo sapiens	confirmed	HLA class II histocompatibility antigen, DRB1-11 beta chain
Q9GIY3	Homo sapiens	potential	HLA class II histocompatibility antigen, DRB1-14 beta chain
P01911	Homo sapiens	confirmed	HLA class II histocompatibility antigen, DRB1-15 beta chain
Q29974	Homo sapiens	potential	HLA class II histocompatibility antigen, DRB1-16 beta chain
Q29974	Homo sapiens	potential	HLA class II histocompatibility antigen, DRB1-16 beta chain
P13760	Homo sapiens	confirmed	HLA class II histocompatibility antigen, DRB1-4 beta chain
P13761	Homo sapiens	confirmed	HLA class II histocompatibility antigen, DRB1-7 beta chain
Q30134	Homo sapiens	confirmed	HLA class II histocompatibility antigen, DRB1-8 beta chain
Q9TQE0	Homo sapiens	confirmed	HLA class II histocompatibility antigen, DRB1-9 beta chain
P79483	Homo sapiens	confirmed	HLA class II histocompatibility antigen, DRB3-1 beta chain
P01913	Homo sapiens	confirmed	HLA class II histocompatibility antigen, DRB3-2 beta chain
Q30154	Homo sapiens	confirmed	HLA class II histocompatibility antigen, DRB5 beta chain
P13762	Homo sapiens	confirmed	HLA class II histocompatibility antigen, DR-W53 beta chain
P05538	Homo sapiens	confirmed	HLA class II histocompatibility antigen, DX beta chain
Q30137	Homo sapiens	potential	HLA DR-beta-I
Q30131	Homo sapiens	potential	HLA DR-beta-III
Q9BCN1	Homo sapiens	potential	HLA-A protein
O19782	Homo sapiens	potential	HLA-B protein
Q30172	Homo sapiens	potential	HLA-B*1514
O02874	Homo sapiens	potential	HLA-B*4012 alpha1 & alpha2 domain
Q30093	Homo sapiens	potential	HLA-DQB1 protein
Q30109	Homo sapiens	potential	HLA-DRB1 protein
Q30178	Homo sapiens	potential	HLA-DRB1 protein
Q29815	Homo sapiens	potential	HLA-DRB7 protein
Q9GZV7	Homo sapiens	potential	Hyaluronan and proteoglycan link protein 2
Q96S86	Homo sapiens	potential	Hyaluronan and proteoglycan link protein 3
Q86UW8	Homo sapiens	potential	Hyaluronan and proteoglycan link protein 4
Q14520	Homo sapiens	confirmed	Hyaluronan-binding protein 2
P38567	Homo sapiens	by similarity	Hyaluronidase PH-20
Q12794	Homo sapiens	potential	Hyaluronidase-1
Q12891	Homo sapiens	potential	Hyaluronidase-2
O43820	Homo sapiens	potential	Hyaluronidase-3
Q7Z5J1	Homo sapiens	potential	Hydroxysteroid 11-beta-dehydrogenase 1-like protein
O14756	Homo sapiens	potential	Hydroxysteroid 17-beta dehydrogenase 6
Q9NQC5	Homo sapiens	potential	Hypothetical protein ORF4
Q9Y4L1	Homo sapiens	by similarity	Hypoxia up-regulated protein 1
O75144	Homo sapiens	potential	ICOS ligand
P22304	Homo sapiens	potential	Iduronate 2-sulfatase
Q9UMJ2	Homo sapiens	potential	IFNA protein
P01743	Homo sapiens	confirmed	Ig heavy chain V-I region HG3
P01744	Homo sapiens	confirmed	Ig heavy chain V-I region ND
P23083	Homo sapiens	confirmed	Ig heavy chain V-I region V35
P06331	Homo sapiens	confirmed	Ig heavy chain V-II region ARH-77
P04438	Homo sapiens	confirmed	Ig heavy chain V-II region SESS
P01764	Homo sapiens	confirmed	Ig heavy chain V-III region VH26
P06315	Homo sapiens	confirmed	Ig kappa chain V region EV15
P04432	Homo sapiens	confirmed	Ig kappa chain V-I region Daudi
P01601	Homo sapiens	confirmed	Ig kappa chain V-I region HK101
P01602	Homo sapiens	confirmed	Ig kappa chain V-I region HK102
P04431	Homo sapiens	confirmed	Ig kappa chain V-I region Walker
P06309	Homo sapiens	confirmed	Ig kappa chain V-II region GM607
P06310	Homo sapiens	confirmed	Ig kappa chain V-II region RPMI 6410
P04207	Homo sapiens	confirmed	Ig kappa chain V-III region CLL
P18135	Homo sapiens	confirmed	Ig kappa chain V-III region HAH
P18136	Homo sapiens	confirmed	Ig kappa chain V-III region HIC
P06311	Homo sapiens	confirmed	Ig kappa chain V-III region IARC/BL41
P01621	Homo sapiens	confirmed	Ig kappa chain V-III region NG9
P04433	Homo sapiens	confirmed	Ig kappa chain V-III region VG
P04434	Homo sapiens	confirmed	Ig kappa chain V-III region VH
P06312	Homo sapiens	confirmed	Ig kappa chain V-IV region
P06314	Homo sapiens	confirmed	Ig kappa chain V-IV region B17
P06313	Homo sapiens	confirmed	Ig kappa chain V-IV region JI
P04211	Homo sapiens	confirmed	Ig lambda chain V region 4A
P06316	Homo sapiens	confirmed	Ig lambda chain V-I region BL2
P06319	Homo sapiens	confirmed	Ig lambda chain V-VI region EB4
A6NJ69	Homo sapiens	potential	IgA-inducing protein homolog
Q9NP10	Homo sapiens	potential	IGF1 protein
P55899	Homo sapiens	confirmed	IgG receptor FcRn large subunit p51
Q9Y298	Homo sapiens	potential	IgG VH protein
Q9Y6R7	Homo sapiens	potential	IgGFc-binding protein
A6NGN9	Homo sapiens	potential	Ig-like domain-containing protein ENSP00000270642
Q8N0Z9	Homo sapiens	potential	Ig-like domain-containing protein FLJ20674
A6NFU0	Homo sapiens	potential	Ig-like V-type domain-containing protein ENSP00000329499
O95974	Homo sapiens	potential	IL-2 protein
Q14197	Homo sapiens	potential	Immature colon carcinoma transcript 1 protein
P24071	Homo sapiens	potential	Immunoglobulin alpha Fc receptor
P12018	Homo sapiens	potential	Immunoglobulin iota chain
P15814	Homo sapiens	potential	Immunoglobulin lambda-like polypeptide 1
O14498	Homo sapiens	potential	Immunoglobulin superfamily containing leucine-rich repeat protein
Q6UXK2	Homo sapiens	potential	Immunoglobulin superfamily containing leucine-rich repeat protein 2
Q8N6C5	Homo sapiens	potential	Immunoglobulin superfamily member 1
Q6WRI0	Homo sapiens	potential	Immunoglobulin superfamily member 10
Q5DX21	Homo sapiens	potential	Immunoglobulin superfamily member 11
Q93033	Homo sapiens	potential	Immunoglobulin superfamily member 2
Q96ID5	Homo sapiens	potential	Immunoglobulin superfamily member 21
O75054	Homo sapiens	potential	Immunoglobulin superfamily member 3
O95976	Homo sapiens	potential	Immunoglobulin superfamily member 6
Q969P0	Homo sapiens	potential	Immunoglobulin superfamily member 8
Q86SU0	Homo sapiens	potential	Immunoglobulin-like domain-containing receptor 1
Q9UKY3	Homo sapiens	potential	Inactive carboxylesterase 4
Q8N3Z0	Homo sapiens	potential	Inactive serine protease 35
Q6UXH9	Homo sapiens	potential	Inactive serine protease RAMP
Q14623	Homo sapiens	probable	Indian hedgehog protein
Q9Y6W8	Homo sapiens	potential	Inducible T-cell costimulator
P05111	Homo sapiens	confirmed	Inhibin alpha chain
P08476	Homo sapiens	by similarity	Inhibin beta A chain
P09529	Homo sapiens	potential	Inhibin beta B chain
P55103	Homo sapiens	potential	Inhibin beta C chain
P58166	Homo sapiens	potential	Inhibin beta E chain
Q9BQU0	Homo sapiens	potential	Inhibitory NK receptor
Q8IWB1	Homo sapiens	potential	Inositol 1,4,5-triphosphate receptor-interacting protein
Q6GPH6	Homo sapiens	potential	Inositol 1,4,5-triphosphate receptor-interacting protein-like 1
Q3MIP1	Homo sapiens	potential	Inositol 1,4,5-triphosphate receptor-interacting protein-like 2
P01308	Homo sapiens	confirmed	Insulin
Q6UW32	Homo sapiens	confirmed	Insulin growth factor-like family member 1
Q6UWQ7	Homo sapiens	potential	Insulin growth factor-like family member 2
Q6UXB1	Homo sapiens	confirmed	Insulin growth factor-like family member 3
Q6B9Z1	Homo sapiens	potential	Insulin growth factor-like family member 4
P06213	Homo sapiens	confirmed	Insulin receptor
P14616	Homo sapiens	potential	Insulin receptor-related protein
P51460	Homo sapiens	confirmed	Insulin-like 3
P08069	Homo sapiens	confirmed	Insulin-like growth factor 1 receptor
Q14620	Homo sapiens	potential	Insulin-like growth factor I
P01343	Homo sapiens	potential	Insulin-like growth factor IA
P05019	Homo sapiens	potential	Insulin-like growth factor IB
P01344	Homo sapiens	confirmed	Insulin-like growth factor II
P08833	Homo sapiens	confirmed	Insulin-like growth factor-binding protein 1
P18065	Homo sapiens	confirmed	Insulin-like growth factor-binding protein 2
P17936	Homo sapiens	confirmed	Insulin-like growth factor-binding protein 3
P22692	Homo sapiens	confirmed	Insulin-like growth factor-binding protein 4
P24593	Homo sapiens	potential	Insulin-like growth factor-binding protein 5
P24592	Homo sapiens	probable	Insulin-like growth factor-binding protein 6
Q16270	Homo sapiens	confirmed	Insulin-like growth factor-binding protein 7
P35858	Homo sapiens	confirmed	Insulin-like growth factor-binding protein complex acid labile chain
Q8WX77	Homo sapiens	potential	Insulin-like growth factor-binding protein-like 1
Q9Y5Q6	Homo sapiens	confirmed	Insulin-like peptide INSL5
Q9Y581	Homo sapiens	potential	Insulin-like peptide INSL6
P11487	Homo sapiens	potential	INT-2 proto-oncogene protein
P98153	Homo sapiens	potential	Integral membrane protein DGCR2/IDD
Q5T9L3	Homo sapiens	potential	Integral membrane protein GPR177
Q86V85	Homo sapiens	potential	Integral membrane protein GPR180
P56199	Homo sapiens	potential	Integrin alpha-1
O75578	Homo sapiens	potential	Integrin alpha-10
Q9UKX5	Homo sapiens	potential	Integrin alpha-11
P17301	Homo sapiens	confirmed	Integrin alpha-2
P26006	Homo sapiens	confirmed	Integrin alpha-3
P13612	Homo sapiens	confirmed	Integrin alpha-4
P08648	Homo sapiens	confirmed	Integrin alpha-5
P23229	Homo sapiens	confirmed	Integrin alpha-6
Q13683	Homo sapiens	confirmed	Integrin alpha-7
P53708	Homo sapiens	potential	Integrin alpha-8
Q13797	Homo sapiens	potential	Integrin alpha-9
Q13349	Homo sapiens	potential	Integrin alpha-D
P38570	Homo sapiens	confirmed	Integrin alpha-E
P08514	Homo sapiens	confirmed	Integrin alpha-IIb
P20701	Homo sapiens	confirmed	Integrin alpha-L
P11215	Homo sapiens	confirmed	Integrin alpha-M
P06756	Homo sapiens	confirmed	Integrin alpha-V
P20702	Homo sapiens	confirmed	Integrin alpha-X
P05556	Homo sapiens	confirmed	Integrin beta-1
P05107	Homo sapiens	confirmed	Integrin beta-2
P05106	Homo sapiens	potential	Integrin beta-3
P16144	Homo sapiens	confirmed	Integrin beta-4
P18084	Homo sapiens	potential	Integrin beta-5
P18564	Homo sapiens	potential	Integrin beta-6
P26010	Homo sapiens	confirmed	Integrin beta-7
P26012	Homo sapiens	potential	Integrin beta-8
O95965	Homo sapiens	potential	Integrin beta-like protein 1
Q8WWA0	Homo sapiens	confirmed	Intelectin-1
Q8WWU7	Homo sapiens	potential	Intelectin-2
P19827	Homo sapiens	potential	Inter-alpha-trypsin inhibitor heavy chain H1
P19823	Homo sapiens	potential	Inter-alpha-trypsin inhibitor heavy chain H2
Q06033	Homo sapiens	potential	Inter-alpha-trypsin inhibitor heavy chain H3
Q14624	Homo sapiens	confirmed	Inter-alpha-trypsin inhibitor heavy chain H4
Q86UX2	Homo sapiens	potential	Inter-alpha-trypsin inhibitor heavy chain H5
Q6UXX5	Homo sapiens	potential	Inter-alpha-trypsin inhibitor heavy chain H5-like protein
P05362	Homo sapiens	confirmed	Intercellular adhesion molecule 1
P13598	Homo sapiens	potential	Intercellular adhesion molecule 2
P32942	Homo sapiens	potential	Intercellular adhesion molecule 3
Q14773	Homo sapiens	potential	Intercellular adhesion molecule 4
Q9UMF0	Homo sapiens	potential	Intercellular adhesion molecule 5
P48551	Homo sapiens	potential	Interferon alpha/beta receptor 2
P01562	Homo sapiens	confirmed	Interferon alpha-1/13
P01566	Homo sapiens	confirmed	Interferon alpha-10
P01570	Homo sapiens	confirmed	Interferon alpha-14
P05015	Homo sapiens	confirmed	Interferon alpha-16
P01571	Homo sapiens	confirmed	Interferon alpha-17
P01563	Homo sapiens	confirmed	Interferon alpha-2
P01568	Homo sapiens	confirmed	Interferon alpha-21
P05014	Homo sapiens	confirmed	Interferon alpha-4
P01569	Homo sapiens	confirmed	Interferon alpha-5
P05013	Homo sapiens	confirmed	Interferon alpha-6
P01567	Homo sapiens	confirmed	Interferon alpha-7
P32881	Homo sapiens	confirmed	Interferon alpha-8
P09912	Homo sapiens	potential	Interferon alpha-inducible protein 6
P01574	Homo sapiens	confirmed	Interferon beta
Q86WN2	Homo sapiens	potential	Interferon epsilon-1
P01579	Homo sapiens	confirmed	Interferon gamma
Q9P0W0	Homo sapiens	confirmed	Interferon kappa
P05000	Homo sapiens	confirmed	Interferon omega-1
P17181	Homo sapiens	potential	Interferon-alpha/beta receptor alpha chain
P48551	Homo sapiens	confirmed	Interferon-alpha/beta receptor beta chain
Q15943	Homo sapiens	potential	Interferon-beta
P15260	Homo sapiens	confirmed	Interferon-gamma receptor alpha chain
P38484	Homo sapiens	potential	Interferon-gamma receptor beta chain
Q9NPH3	Homo sapiens	potential	Interleukin-1 receptor accessory protein
P18510	Homo sapiens	confirmed	Interleukin-1 receptor antagonist protein
P14778	Homo sapiens	confirmed	Interleukin-1 receptor type I
P27930	Homo sapiens	potential	Interleukin-1 receptor type II
Q01638	Homo sapiens	confirmed	Interleukin-1 receptor-like 1
Q9HB29	Homo sapiens	potential	Interleukin-1 receptor-like 2
P22301	Homo sapiens	confirmed	Interleukin-10
Q13651	Homo sapiens	confirmed	Interleukin-10 receptor alpha chain
Q08334	Homo sapiens	confirmed	Interleukin-10 receptor beta chain
P20809	Homo sapiens	potential	Interleukin-11
Q14626	Homo sapiens	by similarity	Interleukin-11 receptor alpha chain
P42701	Homo sapiens	potential	Interleukin-12 receptor beta-1 chain
Q99665	Homo sapiens	potential	Interleukin-12 receptor beta-2 chain
P29459	Homo sapiens	confirmed	Interleukin-12 subunit alpha
P29460	Homo sapiens	confirmed	Interleukin-12 subunit beta
P35225	Homo sapiens	confirmed	Interleukin-13
P78552	Homo sapiens	potential	Interleukin-13 receptor alpha-1 chain
Q14627	Homo sapiens	potential	Interleukin-13 receptor alpha-2 chain
P40933	Homo sapiens	potential	Interleukin-15
Q13261	Homo sapiens	potential	Interleukin-15 receptor subunit alpha
Q96F46	Homo sapiens	confirmed	Interleukin-17 receptor A
Q9NRM6	Homo sapiens	confirmed	Interleukin-17 receptor B
Q8NAC3	Homo sapiens	confirmed	Interleukin-17 receptor C
Q8NFM7	Homo sapiens	potential	Interleukin-17 receptor D
Q8NFR9	Homo sapiens	potential	Interleukin-17 receptor E
Q16552	Homo sapiens	confirmed	Interleukin-17A
Q9UHF5	Homo sapiens	potential	Interleukin-17B
Q9P0M4	Homo sapiens	potential	Interleukin-17C
Q8TAD2	Homo sapiens	potential	Interleukin-17D
Q96PD4	Homo sapiens	confirmed	Interleukin-17F
Q13478	Homo sapiens	confirmed	Interleukin-18 receptor 1
O95256	Homo sapiens	potential	Interleukin-18 receptor accessory protein
O95998	Homo sapiens	confirmed	Interleukin-18-binding protein
Q9UHD0	Homo sapiens	confirmed	Interleukin-19
P60568	Homo sapiens	confirmed	Interleukin-2
P01589	Homo sapiens	confirmed	Interleukin-2 receptor alpha chain
P14784	Homo sapiens	confirmed	Interleukin-2 receptor subunit beta
Q9NYY1	Homo sapiens	confirmed	Interleukin-20
Q9UHF4	Homo sapiens	confirmed	Interleukin-20 receptor alpha chain
Q6UXL0	Homo sapiens	confirmed	Interleukin-20 receptor beta chain
Q9HBE4	Homo sapiens	potential	Interleukin-21
Q9HBE5	Homo sapiens	confirmed	Interleukin-21 receptor
Q9GZX6	Homo sapiens	confirmed	Interleukin-22
Q8N6P7	Homo sapiens	potential	Interleukin-22 receptor subunit alpha-1
Q969J5	Homo sapiens	confirmed	Interleukin-22 receptor subunit alpha-2
Q5VWK5	Homo sapiens	potential	Interleukin-23 receptor
Q9NPF7	Homo sapiens	potential	Interleukin-23 subunit alpha
Q13007	Homo sapiens	confirmed	Interleukin-24
Q9H293	Homo sapiens	confirmed	Interleukin-25
Q9NPH9	Homo sapiens	potential	Interleukin-26
Q6UWB1	Homo sapiens	potential	Interleukin-27 receptor subunit alpha
Q8NEV9	Homo sapiens	potential	Interleukin-27 subunit alpha
Q14213	Homo sapiens	potential	Interleukin-27 subunit beta
Q8IU57	Homo sapiens	potential	Interleukin-28 receptor alpha chain
Q8IZJ0	Homo sapiens	potential	Interleukin-28A
Q8IZI9	Homo sapiens	potential	Interleukin-28B
Q8IU54	Homo sapiens	potential	Interleukin-29
P08700	Homo sapiens	confirmed	Interleukin-3
P26951	Homo sapiens	potential	Interleukin-3 receptor subunit alpha
Q6EBC2	Homo sapiens	potential	Interleukin-31
Q8NI17	Homo sapiens	confirmed	Interleukin-31 receptor A
P24001	Homo sapiens	potential	Interleukin-32
Q6ZMJ4	Homo sapiens	potential	Interleukin-34
P05112	Homo sapiens	confirmed	Interleukin-4
P24394	Homo sapiens	by similarity	Interleukin-4 receptor alpha chain
P05113	Homo sapiens	confirmed	Interleukin-5
Q01344	Homo sapiens	confirmed	Interleukin-5 receptor subunit alpha
Q01344	Homo sapiens	potential	Interleukin-5 receptor subunit alpha
Q14631	Homo sapiens	potential	Interleukin-5 receptor type 2
P05231	Homo sapiens	confirmed	Interleukin-6
P08887	Homo sapiens	confirmed	Interleukin-6 receptor subunit alpha
P40189	Homo sapiens	confirmed	Interleukin-6 receptor subunit beta
P13232	Homo sapiens	confirmed	Interleukin-7
P16871	Homo sapiens	confirmed	Interleukin-7 receptor subunit alpha
P10145	Homo sapiens	confirmed	Interleukin-8
P15248	Homo sapiens	confirmed	Interleukin-9
Q01113	Homo sapiens	potential	Interleukin-9 receptor
Q17R60	Homo sapiens	potential	Interphotoreceptor matrix proteoglycan 1
Q9BZV3	Homo sapiens	potential	Interphotoreceptor matrix proteoglycan 2
P03956	Homo sapiens	confirmed	Interstitial collagenase
P09923	Homo sapiens	confirmed	Intestinal alkaline phosphatase
Q6W762	Homo sapiens	potential	Intestinal mucin MUC3B
Q6PHW0	Homo sapiens	potential	Iodotyrosine dehalogenase 1
Q6ZNF0	Homo sapiens	potential	Iron/zinc purple acid phosphatase-like protein
P10997	Homo sapiens	potential	Islet amyloid polypeptide
P10997	Homo sapiens	potential	Islet amyloid polypeptide
B1AKI9	Homo sapiens	potential	Isthmin
Q8IYV9	Homo sapiens	potential	Izumo sperm-egg fusion protein 1
Q6UXV1	Homo sapiens	potential	Izumo sperm-egg fusion protein 2
Q9Y624	Homo sapiens	confirmed	Junctional adhesion molecule A
P57087	Homo sapiens	confirmed	Junctional adhesion molecule B
Q9BX67	Homo sapiens	confirmed	Junctional adhesion molecule C
Q86YT9	Homo sapiens	confirmed	Junctional adhesion molecule-like
P06870	Homo sapiens	probable	Kallikrein-1
O43240	Homo sapiens	potential	Kallikrein-10
Q9UBX7	Homo sapiens	potential	Kallikrein-11
Q9UKR0	Homo sapiens	potential	Kallikrein-12
Q9UKR3	Homo sapiens	potential	Kallikrein-13
Q9P0G3	Homo sapiens	potential	Kallikrein-14
Q9H2R5	Homo sapiens	potential	Kallikrein-15
P20151	Homo sapiens	probable	Kallikrein-2
Q9Y5K2	Homo sapiens	potential	Kallikrein-4
Q9Y337	Homo sapiens	potential	Kallikrein-5
Q92876	Homo sapiens	potential	Kallikrein-6
P49862	Homo sapiens	confirmed	Kallikrein-7
O60259	Homo sapiens	potential	Kallikrein-8
Q9UKQ9	Homo sapiens	potential	Kallikrein-9
P29622	Homo sapiens	potential	Kallistatin
P07498	Homo sapiens	confirmed	Kappa-casein
Q96I82	Homo sapiens	confirmed	Kazal-type serine protease inhibitor domain-containing protein 1
Q6UW63	Homo sapiens	potential	KDEL motif-containing protein 1
Q7Z4H8	Homo sapiens	potential	KDEL motif-containing protein 2
Q5VTJ3	Homo sapiens	potential	Kelch domain-containing protein 7A
Q9NVR0	Homo sapiens	potential	Kelch-like protein 11
P60985	Homo sapiens	potential	Keratinocyte differentiation-associated protein
P21781	Homo sapiens	confirmed	Keratinocyte growth factor
Q8NC54	Homo sapiens	potential	Keratinocytes-associated transmembrane protein 2
O60938	Homo sapiens	potential	Keratocan
P61109	Homo sapiens	potential	Kidney androgen-regulated protein
P43626	Homo sapiens	confirmed	Killer cell immunoglobulin-like receptor 2DL1
P43627	Homo sapiens	by similarity	Killer cell immunoglobulin-like receptor 2DL2
P43628	Homo sapiens	by similarity	Killer cell immunoglobulin-like receptor 2DL3
Q99706	Homo sapiens	by similarity	Killer cell immunoglobulin-like receptor 2DL4
Q8N109	Homo sapiens	potential	Killer cell immunoglobulin-like receptor 2DL5A
Q8NHK3	Homo sapiens	potential	Killer cell immunoglobulin-like receptor 2DL5B
Q14954	Homo sapiens	by similarity	Killer cell immunoglobulin-like receptor 2DS1
P43631	Homo sapiens	by similarity	Killer cell immunoglobulin-like receptor 2DS2
Q14952	Homo sapiens	by similarity	Killer cell immunoglobulin-like receptor 2DS3
P43632	Homo sapiens	by similarity	Killer cell immunoglobulin-like receptor 2DS4
Q14953	Homo sapiens	by similarity	Killer cell immunoglobulin-like receptor 2DS5
P43629	Homo sapiens	by similarity	Killer cell immunoglobulin-like receptor 3DL1
P43630	Homo sapiens	by similarity	Killer cell immunoglobulin-like receptor 3DL2
Q8N743	Homo sapiens	potential	Killer cell immunoglobulin-like receptor 3DL3
Q14943	Homo sapiens	by similarity	Killer cell immunoglobulin-like receptor 3DS1
Q96J84	Homo sapiens	potential	Kin of IRRE-like protein 1
Q6UWL6	Homo sapiens	confirmed	Kin of IRRE-like protein 2
Q8IZU9	Homo sapiens	potential	Kin of IRRE-like protein 3
P01042	Homo sapiens	confirmed	Kininogen-1
P21583	Homo sapiens	confirmed	Kit ligand
Q9UEF7	Homo sapiens	potential	Klotho
Q96MU8	Homo sapiens	potential	Kremen protein 1
Q8NCW0	Homo sapiens	potential	Kremen protein 2
Q8NBL1	Homo sapiens	confirmed	KTEL motif-containing protein 1
O43278	Homo sapiens	confirmed	Kunitz-type protease inhibitor 1
O43291	Homo sapiens	confirmed	Kunitz-type protease inhibitor 2
P49223	Homo sapiens	potential	Kunitz-type protease inhibitor 3
Q6UDR6	Homo sapiens	potential	Kunitz-type protease inhibitor 4
Q08431	Homo sapiens	confirmed	Lactadherin
Q6UWM7	Homo sapiens	confirmed	Lactase-like protein
P09848	Homo sapiens	confirmed	Lactase-phlorizin hydrolase
P22079	Homo sapiens	potential	Lactoperoxidase
P02788	Homo sapiens	confirmed	Lactotransferrin
P25391	Homo sapiens	potential	Laminin subunit alpha-1
P24043	Homo sapiens	potential	Laminin subunit alpha-2
Q16787	Homo sapiens	potential	Laminin subunit alpha-3
Q16363	Homo sapiens	potential	Laminin subunit alpha-4
O15230	Homo sapiens	potential	Laminin subunit alpha-5
P07942	Homo sapiens	confirmed	Laminin subunit beta-1
P55268	Homo sapiens	potential	Laminin subunit beta-2
Q13751	Homo sapiens	potential	Laminin subunit beta-3
A4D0S4	Homo sapiens	potential	Laminin subunit beta-4
P11047	Homo sapiens	confirmed	Laminin subunit gamma-1
Q13753	Homo sapiens	potential	Laminin subunit gamma-2
Q9Y6N6	Homo sapiens	potential	Laminin subunit gamma-3
Q96RQ9	Homo sapiens	confirmed	L-amino-acid oxidase
Q14767	Homo sapiens	potential	Latent-transforming growth factor beta-binding protein 2
Q9NS15	Homo sapiens	potential	Latent-transforming growth factor beta-binding protein 3
Q8N2S1	Homo sapiens	potential	Latent-transforming growth factor beta-binding protein 4
Q14766	Homo sapiens	potential	Latent-transforming growth factor beta-binding protein, isoform 1L
P22064	Homo sapiens	potential	Latent-transforming growth factor beta-binding protein, isoform 1S
Q86YQ2	Homo sapiens	potential	Latherin
O94910	Homo sapiens	by similarity	Latrophilin-1
O95490	Homo sapiens	potential	Latrophilin-2
Q9HAR2	Homo sapiens	potential	Latrophilin-3
Q6UX15	Homo sapiens	potential	Layilin
Q14745	Homo sapiens	potential	LD78 alpha beta
P40126	Homo sapiens	potential	L-dopachrome tautomerase
O75610	Homo sapiens	potential	Left-right determination factor 1
O00292	Homo sapiens	potential	Left-right determination factor 2
Q99538	Homo sapiens	confirmed	Legumain
P41159	Homo sapiens	potential	Leptin
P48357	Homo sapiens	confirmed	Leptin receptor
Q86TE4	Homo sapiens	potential	Leucine zipper protein 2
P02750	Homo sapiens	confirmed	Leucine-rich alpha-2-glycoprotein
O95970	Homo sapiens	potential	Leucine-rich glioma-inactivated protein 1
Q96II8	Homo sapiens	potential	Leucine-rich repeat and calponin homology domain-containing protein 3
Q9P244	Homo sapiens	potential	Leucine-rich repeat and fibronectin type III domain-containing protein 1
Q9ULH4	Homo sapiens	potential	Leucine-rich repeat and fibronectin type-III domain-containing protein 2
Q9BTN0	Homo sapiens	potential	Leucine-rich repeat and fibronectin type-III domain-containing protein 3
Q6PJG9	Homo sapiens	potential	Leucine-rich repeat and fibronectin type-III domain-containing protein 4
Q96NI6	Homo sapiens	potential	Leucine-rich repeat and fibronectin type-III domain-containing protein 5
Q5R3F8	Homo sapiens	potential	Leucine-rich repeat and fibronectin type-III domain-containing protein 6
Q96FE5	Homo sapiens	potential	Leucine-rich repeat and immunoglobulin-like domain-containing nogo receptor-interacting protein 1
Q7L985	Homo sapiens	potential	Leucine-rich repeat and immunoglobulin-like domain-containing nogo receptor-interacting protein 2
P0C6S8	Homo sapiens	potential	Leucine-rich repeat and immunoglobulin-like domain-containing nogo receptor-interacting protein 3
Q6UY18	Homo sapiens	potential	Leucine-rich repeat and immunoglobulin-like domain-containing nogo receptor-interacting protein 4
Q9HBL6	Homo sapiens	potential	Leucine-rich repeat and transmembrane domain-containing protein 1
Q8N967	Homo sapiens	potential	Leucine-rich repeat and transmembrane domain-containing protein 2
Q8N0V4	Homo sapiens	potential	Leucine-rich repeat LGI family member 2
Q8N145	Homo sapiens	potential	Leucine-rich repeat LGI family member 3
Q8N135	Homo sapiens	potential	Leucine-rich repeat LGI family member 4
Q6UXK5	Homo sapiens	confirmed	Leucine-rich repeat neuronal protein 1
O75325	Homo sapiens	potential	Leucine-rich repeat neuronal protein 2
Q9H3W5	Homo sapiens	potential	Leucine-rich repeat neuronal protein 3
Q8WUT4	Homo sapiens	potential	Leucine-rich repeat neuronal protein 4
Q86UE6	Homo sapiens	potential	Leucine-rich repeat transmembrane neuronal protein 1
O43300	Homo sapiens	potential	Leucine-rich repeat transmembrane neuronal protein 2
Q86VH5	Homo sapiens	potential	Leucine-rich repeat transmembrane neuronal protein 3
Q86VH4	Homo sapiens	potential	Leucine-rich repeat transmembrane neuronal protein 4
Q9NZU1	Homo sapiens	potential	Leucine-rich repeat transmembrane protein FLRT1
O43155	Homo sapiens	confirmed	Leucine-rich repeat transmembrane protein FLRT2
Q9NZU0	Homo sapiens	potential	Leucine-rich repeat transmembrane protein FLRT3
Q9P2V4	Homo sapiens	potential	Leucine-rich repeat, immunoglobulin-like domain and transmembrane domain-containing protein 1
A6NDA9	Homo sapiens	potential	Leucine-rich repeat, immunoglobulin-like domain and transmembrane domain-containing protein 2
Q9BXB1	Homo sapiens	potential	Leucine-rich repeat-containing G-protein coupled receptor 4
O75473	Homo sapiens	potential	Leucine-rich repeat-containing G-protein coupled receptor 5
Q9HBX8	Homo sapiens	potential	Leucine-rich repeat-containing G-protein coupled receptor 6
Q8TF66	Homo sapiens	potential	Leucine-rich repeat-containing protein 15
Q8N6Y2	Homo sapiens	potential	Leucine-rich repeat-containing protein 17
Q9H756	Homo sapiens	potential	Leucine-rich repeat-containing protein 19
Q50LG9	Homo sapiens	potential	Leucine-rich repeat-containing protein 24
Q8N386	Homo sapiens	potential	Leucine-rich repeat-containing protein 25
Q2I0M4	Homo sapiens	potential	Leucine-rich repeat-containing protein 26
Q9BY71	Homo sapiens	potential	Leucine-rich repeat-containing protein 3
Q14392	Homo sapiens	potential	Leucine-rich repeat-containing protein 32
Q86YC3	Homo sapiens	potential	Leucine-rich repeat-containing protein 33
A6NMS7	Homo sapiens	potential	Leucine-rich repeat-containing protein 37A
A6NM11	Homo sapiens	potential	Leucine-rich repeat-containing protein 37A2
O60309	Homo sapiens	potential	Leucine-rich repeat-containing protein 37A3
Q96QE4	Homo sapiens	potential	Leucine-rich repeat-containing protein 37B
Q5VT99	Homo sapiens	potential	Leucine-rich repeat-containing protein 38
Q96PB8	Homo sapiens	potential	Leucine-rich repeat-containing protein 3B
Q9HBW1	Homo sapiens	potential	Leucine-rich repeat-containing protein 4
Q9NT99	Homo sapiens	potential	Leucine-rich repeat-containing protein 4B
Q8N7C0	Homo sapiens	potential	Leucine-rich repeat-containing protein 52
Q6ZSA7	Homo sapiens	confirmed	Leucine-rich repeat-containing protein 55
Q7L0X0	Homo sapiens	potential	Leucine-rich repeat-containing protein KIAA0644
Q96JA1	Homo sapiens	potential	Leucine-rich repeats and immunoglobulin-like domains protein 1
O94898	Homo sapiens	potential	Leucine-rich repeats and immunoglobulin-like domains protein 2
Q6UXM1	Homo sapiens	potential	Leucine-rich repeats and immunoglobulin-like domains protein 3
Q9MY50	Homo sapiens	potential	Leucocyte antigen A
Q9MYB7	Homo sapiens	potential	Leucocyte antigen A
Q9MYB9	Homo sapiens	potential	Leucocyte antigen DRB1
P15018	Homo sapiens	confirmed	Leukemia inhibitory factor
P42702	Homo sapiens	potential	Leukemia inhibitory factor receptor
O15506	Homo sapiens	potential	Leukocyte antigen
O78209	Homo sapiens	potential	Leukocyte antigen
O14960	Homo sapiens	by similarity	Leukocyte cell-derived chemotaxin-2
P08575	Homo sapiens	confirmed	Leukocyte common antigen
P08246	Homo sapiens	potential	Leukocyte elastase
O75019	Homo sapiens	potential	Leukocyte immunoglobulin-like receptor subfamily A member 1
Q8N149	Homo sapiens	potential	Leukocyte immunoglobulin-like receptor subfamily A member 2
Q8N6C8	Homo sapiens	confirmed	Leukocyte immunoglobulin-like receptor subfamily A member 3
P59901	Homo sapiens	potential	Leukocyte immunoglobulin-like receptor subfamily A member 4
A6NI73	Homo sapiens	potential	Leukocyte immunoglobulin-like receptor subfamily A member 5
Q6PI73	Homo sapiens	potential	Leukocyte immunoglobulin-like receptor subfamily A member 6
Q8NHL6	Homo sapiens	potential	Leukocyte immunoglobulin-like receptor subfamily B member 1
Q8N423	Homo sapiens	potential	Leukocyte immunoglobulin-like receptor subfamily B member 2
O75022	Homo sapiens	potential	Leukocyte immunoglobulin-like receptor subfamily B member 3
Q8NHJ6	Homo sapiens	potential	Leukocyte immunoglobulin-like receptor subfamily B member 4
O75023	Homo sapiens	potential	Leukocyte immunoglobulin-like receptor subfamily B member 5
Q08722	Homo sapiens	potential	Leukocyte surface antigen CD47
P29376	Homo sapiens	potential	Leukocyte tyrosine kinase receptor
Q6GTX8	Homo sapiens	potential	Leukocyte-associated immunoglobulin-like receptor 1
Q6ISS4	Homo sapiens	potential	Leukocyte-associated immunoglobulin-like receptor 2
P16150	Homo sapiens	confirmed	Leukosialin
Q13449	Homo sapiens	potential	Limbic system-associated membrane protein
Q8WWY8	Homo sapiens	potential	Lipase member H
Q6XZB0	Homo sapiens	potential	Lipase member I
Q5VXJ0	Homo sapiens	potential	Lipase member K
Q5VYY2	Homo sapiens	potential	Lipase member M
Q5VXI9	Homo sapiens	potential	Lipase member N
P31025	Homo sapiens	confirmed	Lipocalin-1
Q6UWW0	Homo sapiens	potential	Lipocalin-15;
Q9Y693	Homo sapiens	potential	Lipoma HMGIC fusion partner
Q86WI0	Homo sapiens	potential	Lipoma HMGIC fusion partner-like 1 protein
P18428	Homo sapiens	confirmed	Lipopolysaccharide-binding protein
P06858	Homo sapiens	confirmed	Lipoprotein lipase
P05451	Homo sapiens	confirmed	Lithostathine-1-alpha
P48304	Homo sapiens	by similarity	Lithostathine-1-beta
P23141	Homo sapiens	confirmed	Liver carboxylesterase 1
Q969E1	Homo sapiens	potential	Liver-expressed antimicrobial peptide 2
Q8TDL5	Homo sapiens	potential	Long palate, lung and nasal epithelium carcinoma-associated protein 1
P59826	Homo sapiens	potential	Long palate, lung and nasal epithelium carcinoma-associated protein 3
P59827	Homo sapiens	potential	Long palate, lung and nasal epithelium carcinoma-associated protein 4
P12318	Homo sapiens	confirmed	Low affinity immunoglobulin gamma Fc region receptor II-a
P31994	Homo sapiens	potential	Low affinity immunoglobulin gamma Fc region receptor II-b
P31995	Homo sapiens	potential	Low affinity immunoglobulin gamma Fc region receptor II-c
P08637	Homo sapiens	potential	Low affinity immunoglobulin gamma Fc region receptor III-A
O75015	Homo sapiens	potential	Low affinity immunoglobulin gamma Fc region receptor III-B
P01130	Homo sapiens	confirmed	Low-density lipoprotein receptor
Q5SZI1	Homo sapiens	potential	Low-density lipoprotein receptor class A domain-containing protein 2
Q86YD5	Homo sapiens	potential	Low-density lipoprotein receptor class A domain-containing protein 3
Q7Z4F1	Homo sapiens	potential	Low-density lipoprotein receptor-related protein 10
Q86VZ4	Homo sapiens	potential	Low-density lipoprotein receptor-related protein 11
Q9Y561	Homo sapiens	potential	Low-density lipoprotein receptor-related protein 12
Q9NZR2	Homo sapiens	potential	Low-density lipoprotein receptor-related protein 1B
P98164	Homo sapiens	potential	Low-density lipoprotein receptor-related protein 2
O75074	Homo sapiens	potential	Low-density lipoprotein receptor-related protein 3
O75096	Homo sapiens	potential	Low-density lipoprotein receptor-related protein 4
O75096	Homo sapiens	potential	Low-density lipoprotein receptor-related protein 4
O75197	Homo sapiens	potential	Low-density lipoprotein receptor-related protein 5
O75581	Homo sapiens	potential	Low-density lipoprotein receptor-related protein 6
Q14114	Homo sapiens	potential	Low-density lipoprotein receptor-related protein 8
Q8ND94	Homo sapiens	potential	LRRN4 C-terminal-like protein
P14151	Homo sapiens	confirmed	L-selectin
P51884	Homo sapiens	confirmed	Lumican
Q8IYD9	Homo sapiens	potential	Lung adenoma susceptibility protein 2
P50895	Homo sapiens	confirmed	Lutheran blood group glycoprotein
P01229	Homo sapiens	confirmed	Lutropin subunit beta
P22888	Homo sapiens	potential	Lutropin-choriogonadotropic hormone receptor
Q9BZG9	Homo sapiens	potential	Ly-6/neurotoxin-like protein 1
Q8N2G4	Homo sapiens	potential	Ly6/PLAUR domain-containing protein 1
Q6UXB3	Homo sapiens	potential	Ly6/PLAUR domain-containing protein 2
O95274	Homo sapiens	potential	Ly6/PLAUR domain-containing protein 3
Q6UWN0	Homo sapiens	potential	Ly6/PLAUR domain-containing protein 4
Q6UWN5	Homo sapiens	confirmed	Ly6/PLAUR domain-containing protein 5
Q86Y78	Homo sapiens	confirmed	Ly6/PLAUR domain-containing protein 6
Q8NI32	Homo sapiens	potential	Ly6/PLAUR domain-containing protein 6B
Q9Y5Y7	Homo sapiens	potential	Lymphatic vessel endothelial hyaluronic acid receptor 1
P18627	Homo sapiens	confirmed	Lymphocyte activation gene 3 protein
O78219	Homo sapiens	potential	Lymphocyte antigen
Q29967	Homo sapiens	potential	Lymphocyte antigen
Q8NDX9	Homo sapiens	potential	Lymphocyte antigen 6 complex locus protein G5b
Q5SRR4	Homo sapiens	potential	Lymphocyte antigen 6 complex locus protein G5c
O95867	Homo sapiens	potential	Lymphocyte antigen 6 complex locus protein G6c
O95868	Homo sapiens	potential	Lymphocyte antigen 6 complex locus protein G6d
Q5SQ64	Homo sapiens	potential	Lymphocyte antigen 6 complex locus protein G6f
Q14210	Homo sapiens	confirmed	Lymphocyte antigen 6D
Q16553	Homo sapiens	potential	Lymphocyte antigen 6E
O94772	Homo sapiens	potential	Lymphocyte antigen 6H
Q17RY6	Homo sapiens	potential	Lymphocyte antigen 6K
O60449	Homo sapiens	confirmed	Lymphocyte antigen 75
O95711	Homo sapiens	confirmed	Lymphocyte antigen 86
Q9Y6Y9	Homo sapiens	potential	Lymphocyte antigen 96
P19256	Homo sapiens	confirmed	Lymphocyte function-associated antigen 3
P47992	Homo sapiens	potential	Lymphotactin
P01374	Homo sapiens	confirmed	Lymphotoxin-alpha
Q9NPH0	Homo sapiens	confirmed	Lysophosphatidic acid phosphatase type 6
P38571	Homo sapiens	potential	Lysosomal acid lipase/cholesteryl ester hydrolase
P11117	Homo sapiens	confirmed	Lysosomal acid phosphatase
P10253	Homo sapiens	potential	Lysosomal alpha-glucosidase
O00754	Homo sapiens	confirmed	Lysosomal alpha-mannosidase
P10619	Homo sapiens	confirmed	Lysosomal protective protein
Q8WWB7	Homo sapiens	potential	Lysosomal protein NCU-G1
P42785	Homo sapiens	potential	Lysosomal Pro-X carboxypeptidase
Q9UMR5	Homo sapiens	potential	Lysosomal thioesterase PPT2
P11279	Homo sapiens	confirmed	Lysosome-associated membrane glycoprotein 1
P13473	Homo sapiens	confirmed	Lysosome-associated membrane glycoprotein 2
Q9UQV4	Homo sapiens	potential	Lysosome-associated membrane glycoprotein 3
Q9UJQ1	Homo sapiens	potential	Lysosome-associated membrane glycoprotein 5
P61626	Homo sapiens	confirmed	Lysozyme C
Q8N1E2	Homo sapiens	potential	Lysozyme g-like protein 1
Q86SG7	Homo sapiens	potential	Lysozyme g-like protein 2
Q6UWQ5	Homo sapiens	potential	Lysozyme-like protein 1
Q7Z4W2	Homo sapiens	potential	Lysozyme-like protein 2
Q96KX0	Homo sapiens	potential	Lysozyme-like protein 4
O75951	Homo sapiens	potential	Lysozyme-like protein 6
Q08397	Homo sapiens	potential	Lysyl oxidase homolog 1
Q9Y4K0	Homo sapiens	potential	Lysyl oxidase homolog 2
P58215	Homo sapiens	potential	Lysyl oxidase homolog 3
Q96JB6	Homo sapiens	potential	Lysyl oxidase homolog 4
P09603	Homo sapiens	confirmed	Macrophage colony-stimulating factor 1
P07333	Homo sapiens	potential	Macrophage colony-stimulating factor 1 receptor
P22897	Homo sapiens	potential	Macrophage mannose receptor 1
Q5VSK2	Homo sapiens	potential	Macrophage mannose receptor 1-like protein 1
P39900	Homo sapiens	probable	Macrophage metalloelastase
Q2M385	Homo sapiens	potential	Macrophage-expressed gene 1 protein
Q04912	Homo sapiens	potential	Macrophage-stimulating protein receptor
P34810	Homo sapiens	potential	Macrosialin
Q9H0U3	Homo sapiens	potential	Magnesium transporter protein 1
Q95460	Homo sapiens	confirmed	Major histocompatibility complex class I-related gene protein
Q14535	Homo sapiens	potential	Major histocompatibility complex,class II, DO alpha
P04156	Homo sapiens	confirmed	Major prion protein
Q14165	Homo sapiens	potential	Malectin
Q5VYJ5	Homo sapiens	potential	MAM and LDL-receptor class A domain-containing protein C10orf112
Q8NFP4	Homo sapiens	potential	MAM domain-containing glycosylphosphatidylinositol anchor protein 1
Q7Z553	Homo sapiens	potential	MAM domain-containing glycosylphosphatidylinositol anchor protein 2
Q7Z304	Homo sapiens	potential	MAM domain-containing protein 2
Q13296	Homo sapiens	potential	Mammaglobin-A
O75556	Homo sapiens	confirmed	Mammaglobin-B
Q9UM22	Homo sapiens	potential	Mammalian ependymin-related protein 1
Q16791	Homo sapiens	potential	Mammary dihydrolipoamide acetyltransferase
O00187	Homo sapiens	potential	Mannan-binding lectin serine protease 2
Q6UXF7	Homo sapiens	potential	Mannose receptor-like protein 1
A5D8T8	Homo sapiens	potential	Mannose receptor-like protein 2
Q8NCF0	Homo sapiens	potential	Mannose receptor-like protein 3
P11226	Homo sapiens	confirmed	Mannose-binding protein C
Q9H8J5	Homo sapiens	potential	MANSC domain-containing protein 1
A6NHS7	Homo sapiens	potential	MANSC domain-containing protein ENSP00000370673
P15088	Homo sapiens	confirmed	Mast cell carboxypeptidase A
P10721	Homo sapiens	potential	Mast/stem cell growth factor receptor
O00339	Homo sapiens	potential	Matrilin-2
O15232	Homo sapiens	potential	Matrilin-3
O95460	Homo sapiens	by similarity	Matrilin-4
P09237	Homo sapiens	confirmed	Matrilysin
Q9NQ76	Homo sapiens	potential	Matrix extracellular phosphoglycoprotein
P08493	Homo sapiens	confirmed	Matrix Gla protein
P50281	Homo sapiens	potential	Matrix metalloproteinase-14
P51511	Homo sapiens	potential	Matrix metalloproteinase-15
P51512	Homo sapiens	potential	Matrix metalloproteinase-16
Q9ULZ9	Homo sapiens	potential	Matrix metalloproteinase-17
Q99542	Homo sapiens	potential	Matrix metalloproteinase-19
O60882	Homo sapiens	potential	Matrix metalloproteinase-20
Q8N119	Homo sapiens	potential	Matrix metalloproteinase-21
Q9Y5R2	Homo sapiens	potential	Matrix metalloproteinase-24
Q9NPA2	Homo sapiens	potential	Matrix metalloproteinase-25
Q9NRE1	Homo sapiens	potential	Matrix metalloproteinase-26
Q9H306	Homo sapiens	potential	Matrix metalloproteinase-27
Q9H239	Homo sapiens	potential	Matrix metalloproteinase-28
P14780	Homo sapiens	confirmed	Matrix metalloproteinase-9
Q9NR99	Homo sapiens	potential	Matrix-remodeling-associated protein 5
Q9BRK3	Homo sapiens	potential	Matrix-remodeling-associated protein 8
Q9Y6X3	Homo sapiens	potential	MAU2 chromatid cohesion factor homolog
P40967	Homo sapiens	confirmed	Melanocyte protein Pmel 17
Q96PC5	Homo sapiens	potential	Melanoma inhibitory activity protein 2
Q5JRA6	Homo sapiens	potential	Melanoma inhibitory activity protein 3
Q16674	Homo sapiens	confirmed	Melanoma-derived growth regulatory protein
P08582	Homo sapiens	confirmed	Melanotransferrin
P15529	Homo sapiens	confirmed	Membrane cofactor protein
Q8TBP5	Homo sapiens	potential	Membrane protein FAM174A
Q3ZCQ3	Homo sapiens	potential	Membrane protein FAM174B
Q14703	Homo sapiens	confirmed	Membrane-bound transcription factor site-1 protease
Q16819	Homo sapiens	by similarity	Meprin A subunit alpha
Q16820	Homo sapiens	potential	Meprin A subunit beta
Q13421	Homo sapiens	confirmed	Mesothelin
Q96KJ4	Homo sapiens	potential	Mesothelin-like protein
Q13255	Homo sapiens	potential	Metabotropic glutamate receptor 1
Q14416	Homo sapiens	potential	Metabotropic glutamate receptor 2
Q14832	Homo sapiens	potential	Metabotropic glutamate receptor 3
Q14833	Homo sapiens	potential	Metabotropic glutamate receptor 4
P41594	Homo sapiens	potential	Metabotropic glutamate receptor 5
O15303	Homo sapiens	potential	Metabotropic glutamate receptor 6
Q14831	Homo sapiens	potential	Metabotropic glutamate receptor 7
O00222	Homo sapiens	potential	Metabotropic glutamate receptor 8
P01033	Homo sapiens	confirmed	Metalloproteinase inhibitor 1
P16035	Homo sapiens	confirmed	Metalloproteinase inhibitor 2
P35625	Homo sapiens	confirmed	Metalloproteinase inhibitor 3
Q99727	Homo sapiens	potential	Metalloproteinase inhibitor 4
[truncated: 1,551 more rows]

## Sheet: Sheet2
Q9ERR7	Mus musculus	potential	15 kDa selenoprotein
P02815	Mus musculus	potential	16.5 kDa submandibular gland glycoprotein
Q8VCR2	Mus musculus	potential	17-beta hydroxysteroid dehydrogenase 13
Q8K2C8	Mus musculus	potential	1-acyl-sn-glycerol-3-phosphate acyltransferase zeta
Q8VEB4	Mus musculus	by similarity	1-O-acylceramide synthase
Q8VCH6	Mus musculus	potential	24-dehydrocholesterol reductase
Q64676	Mus musculus	potential	2-hydroxyacylsphingosine 1-beta-galactosyltransferase
Q6GV12	Mus musculus	potential	3-ketodihydrosphingosine reductase
Q61112	Mus musculus	potential	45 kDa calcium-binding protein
P07147	Mus musculus	confirmed	5,6-dihydroxyindole-2-carboxylic acid oxidase
P23979	Mus musculus	potential	5-hydroxytryptamine receptor 3A
Q9JHJ5	Mus musculus	potential	5-hydroxytryptamine receptor 3B
Q61503	Mus musculus	by similarity	5'-nucleotidase
P33434	Mus musculus	potential	72 kDa type IV collagenase
P20029	Mus musculus	confirmed	78 kDa glucose-regulated protein
P97857	Mus musculus	potential	A disintegrin and metalloproteinase with thrombospondin motifs 1
P58459	Mus musculus	potential	A disintegrin and metalloproteinase with thrombospondin motifs 10
Q811B3	Mus musculus	potential	A disintegrin and metalloproteinase with thrombospondin motifs 12
Q769J6	Mus musculus	potential	A disintegrin and metalloproteinase with thrombospondin motifs 13
P59384	Mus musculus	potential	A disintegrin and metalloproteinase with thrombospondin motifs 15
Q69Z28	Mus musculus	potential	A disintegrin and metalloproteinase with thrombospondin motifs 16
Q4VC17	Mus musculus	potential	A disintegrin and metalloproteinase with thrombospondin motifs 18
P59509	Mus musculus	potential	A disintegrin and metalloproteinase with thrombospondin motifs 19
Q8C9W3	Mus musculus	potential	A disintegrin and metalloproteinase with thrombospondin motifs 2
P59511	Mus musculus	potential	A disintegrin and metalloproteinase with thrombospondin motifs 20
Q8BNJ2	Mus musculus	potential	A disintegrin and metalloproteinase with thrombospondin motifs 4
Q9R001	Mus musculus	potential	A disintegrin and metalloproteinase with thrombospondin motifs 5
Q68SA9	Mus musculus	potential	A disintegrin and metalloproteinase with thrombospondin motifs 7
P57110	Mus musculus	potential	A disintegrin and metalloproteinase with thrombospondin motifs 8
Q3V1F8	Mus musculus	potential	Abhydrolase domain-containing protein 9
Q99JW1	Mus musculus	potential	Abhydrolase domain-containing protein FAM108A
Q7M759	Mus musculus	potential	Abhydrolase domain-containing protein FAM108B1
Q5F2F2	Mus musculus	potential	Abhydrolase domain-containing protein UNQ6510/PRO21435 homolog
P04756	Mus musculus	confirmed	Acetylcholine receptor subunit alpha
P09690	Mus musculus	confirmed	Acetylcholine receptor subunit beta
P02716	Mus musculus	confirmed	Acetylcholine receptor subunit delta
P20782	Mus musculus	confirmed	Acetylcholine receptor subunit epsilon
P04760	Mus musculus	potential	Acetylcholine receptor subunit gamma
P21836	Mus musculus	confirmed	Acetylcholinesterase
O35348	Mus musculus	potential	Acetylcholinesterase collagenic tail peptide
Q9WV54	Mus musculus	potential	Acid ceramidase
Q8BHA9	Mus musculus	potential	Acid phosphatase-like protein 2
P70158	Mus musculus	potential	Acid sphingomyelinase-like phosphodiesterase 3a
P58242	Mus musculus	potential	Acid sphingomyelinase-like phosphodiesterase 3b
Q91XA9	Mus musculus	confirmed	Acidic mammalian chitinase
P23578	Mus musculus	confirmed	Acrosin
Q3V140	Mus musculus	potential	Acrosin-binding protein
P50289	Mus musculus	potential	Acrosomal protein SP-10
Q9D9V2	Mus musculus	potential	Acrosome formation-associated factor
P37172	Mus musculus	by similarity	Activin receptor type-1
Q61271	Mus musculus	potential	Activin receptor type-1B
Q8K348	Mus musculus	potential	Activin receptor type-1C
P27038	Mus musculus	potential	Activin receptor type-2A
P27040	Mus musculus	potential	Activin receptor type-2B
O35298	Mus musculus	potential	Acyloxyacyl hydrolase
O35598	Mus musculus	potential	ADAM 10
Q9R1V4	Mus musculus	potential	ADAM 11
Q61824	Mus musculus	potential	ADAM 12
O88839	Mus musculus	potential	ADAM 15
Q9Z0F8	Mus musculus	potential	ADAM 17
Q9R157	Mus musculus	potential	ADAM 18
O35674	Mus musculus	potential	ADAM 19
Q9JI76	Mus musculus	potential	ADAM 21
Q9R1V6	Mus musculus	potential	ADAM 22
Q9R1V7	Mus musculus	potential	ADAM 23
Q9R160	Mus musculus	potential	ADAM 24
Q9R159	Mus musculus	potential	ADAM 25
Q9R158	Mus musculus	potential	ADAM 26A
Q9JLN6	Mus musculus	potential	ADAM 28
Q8K410	Mus musculus	potential	ADAM 32
Q923W9	Mus musculus	potential	ADAM 33
Q05910	Mus musculus	potential	ADAM 8
Q61072	Mus musculus	potential	ADAM 9
Q9R0X2	Mus musculus	potential	ADAM DEC1
Q8BLI0	Mus musculus	by similarity	ADAMTS-like protein 1
Q7TSK7	Mus musculus	potential	ADAMTS-like protein 2
Q80T21	Mus musculus	potential	ADAMTS-like protein 4
Q8R373	Mus musculus	potential	Adipocyte adhesion molecule
Q640N1	Mus musculus	potential	Adipocyte enhancer-binding protein 1
Q60994	Mus musculus	confirmed	Adiponectin
P97297	Mus musculus	by similarity	ADM
Q7TNK8	Mus musculus	potential	ADM2
Q8VDL4	Mus musculus	potential	ADP-dependent glucokinase
Q64277	Mus musculus	confirmed	ADP-ribosyl cyclase 2
Q62151	Mus musculus	potential	Advanced glycosylation end product-specific receptor
O89020	Mus musculus	by similarity	Afamin
Q61282	Mus musculus	potential	Aggrecan core protein
P56473	Mus musculus	potential	Agouti-related protein
Q03288	Mus musculus	potential	Agouti-signaling protein
A2ASQ1	Mus musculus	potential	Agrin
P97793	Mus musculus	potential	ALK tyrosine kinase receptor
P09242	Mus musculus	confirmed	Alkaline phosphatase, tissue-nonspecific isozyme
Q9D6Z0	Mus musculus	potential	Alkylated DNA repair protein alkB homolog 7
Q64FW2	Mus musculus	potential	All-trans-retinol 13,14-reductase
Q3V1N9	Mus musculus	potential	Alpha 1,3-galactosyltransferase 2
Q60590	Mus musculus	by similarity	Alpha-1-acid glycoprotein 1
P07361	Mus musculus	confirmed	Alpha-1-acid glycoprotein 2
Q63805	Mus musculus	by similarity	Alpha-1-acid glycoprotein 3
P07758	Mus musculus	by similarity	Alpha-1-antitrypsin 1-1
P22599	Mus musculus	by similarity	Alpha-1-antitrypsin 1-2
Q00896	Mus musculus	potential	Alpha-1-antitrypsin 1-3
Q00897	Mus musculus	potential	Alpha-1-antitrypsin 1-4
Q00898	Mus musculus	potential	Alpha-1-antitrypsin 1-5
Q9DCQ7	Mus musculus	potential	Alpha-1-antitrypsin 1-6
Q19LI2	Mus musculus	potential	Alpha-1B-glycoprotein
Q61247	Mus musculus	confirmed	Alpha-2-antiplasmin
P29699	Mus musculus	potential	Alpha-2-HS-glycoprotein
Q61838	Mus musculus	potential	Alpha-2-macroglobulin
P55302	Mus musculus	potential	Alpha-2-macroglobulin receptor-associated protein
Q6GQT1	Mus musculus	potential	Alpha-2-macroglobulin-P
P00687	Mus musculus	confirmed	Alpha-amylase 1
P02772	Mus musculus	by similarity	Alpha-fetoprotein
P51569	Mus musculus	by similarity	Alpha-galactosidase A
Q61718	Mus musculus	potential	Alpha-interferon
P29752	Mus musculus	confirmed	Alpha-lactalbumin
P48441	Mus musculus	potential	Alpha-L-iduronidase
Q9QWR8	Mus musculus	by similarity	Alpha-N-acetylgalactosaminidase
P19228	Mus musculus	by similarity	Alpha-S1-casein
Q02862	Mus musculus	confirmed	Alpha-S2-casein-like A
P02664	Mus musculus	by similarity	Alpha-S2-casein-like B
P82350	Mus musculus	potential	Alpha-sarcoglycan
O08523	Mus musculus	confirmed	Alpha-tectorin
P26618	Mus musculus	potential	Alpha-type platelet-derived growth factor receptor
O55189	Mus musculus	potential	Ameloblastin
P63277	Mus musculus	by similarity	Amelogenin, X isoform
Q9D3J8	Mus musculus	by similarity	Amelotin
Q8JZQ5	Mus musculus	potential	Amiloride-sensitive amine oxidase [copper-containing]
P31955	Mus musculus	potential	Amphiregulin
Q80ZD8	Mus musculus	potential	Amphoterin-induced protein 1
Q80ZD9	Mus musculus	potential	Amphoterin-induced protein 2
Q8C2S7	Mus musculus	potential	Amphoterin-induced protein 3
P12023	Mus musculus	by similarity	Amyloid beta A4 protein
Q03157	Mus musculus	potential	Amyloid-like protein 1
Q06335	Mus musculus	potential	Amyloid-like protein 2
Q9JI02	Mus musculus	potential	Androgen-binding protein delta
Q6UGQ3	Mus musculus	potential	Androgen-binding protein epsilon
Q7M747	Mus musculus	potential	Androgen-binding protein zeta
P21570	Mus musculus	confirmed	Angiogenin
Q64438	Mus musculus	potential	Angiogenin-2
P97802	Mus musculus	potential	Angiogenin-3
O08538	Mus musculus	potential	Angiopoietin-1
Q02858	Mus musculus	potential	Angiopoietin-1 receptor
O35608	Mus musculus	potential	Angiopoietin-2
Q9WVH6	Mus musculus	potential	Angiopoietin-4
Q640P2	Mus musculus	potential	Angiopoietin-related protein 1
Q9R045	Mus musculus	potential	Angiopoietin-related protein 2
Q9R182	Mus musculus	potential	Angiopoietin-related protein 3
Q9Z1P8	Mus musculus	potential	Angiopoietin-related protein 4
Q8R0Z6	Mus musculus	potential	Angiopoietin-related protein 6
Q8R1Q3	Mus musculus	by similarity	Angiopoietin-related protein 7
Q8R0I0	Mus musculus	potential	Angiotensin-converting enzyme 2
P09470	Mus musculus	confirmed	Angiotensin-converting enzyme, somatic isoform
P22967	Mus musculus	by similarity	Angiotensin-converting enzyme, testis-specific isoform
P11859	Mus musculus	confirmed	Angiotensinogen
P07146	Mus musculus	confirmed	Anionic trypsin-2
Q8BLS7	Mus musculus	potential	Ankyrin repeat domain-containing protein 43
O55083	Mus musculus	potential	ANP protein
O88312	Mus musculus	potential	Anterior gradient protein 2 homolog
Q8R3W7	Mus musculus	potential	Anterior gradient protein 3 homolog
Q9CZ52	Mus musculus	potential	Anthrax toxin receptor 1
Q6DFX2	Mus musculus	potential	Anthrax toxin receptor 2
Q8BVM2	Mus musculus	potential	Anthrax toxin receptor-like
P97430	Mus musculus	by similarity	Antileukoproteinase
Q8K592	Mus musculus	potential	Anti-Muellerian hormone type-2 receptor
P32261	Mus musculus	by similarity	Antithrombin-III
Q9R0R4	Mus musculus	potential	Apelin
A2AJA7	Mus musculus	potential	Apical endosomal glycoprotein
Q00623	Mus musculus	by similarity	Apolipoprotein A-I
Q8K4Z3	Mus musculus	potential	Apolipoprotein A-I-binding protein
P09813	Mus musculus	confirmed	Apolipoprotein A-II
P06728	Mus musculus	confirmed	Apolipoprotein A-IV
Q01488	Mus musculus	potential	Apolipoprotein A-IV
Q8C7G5	Mus musculus	potential	Apolipoprotein A-V
P34928	Mus musculus	by similarity	Apolipoprotein C-I
Q05020	Mus musculus	by similarity	Apolipoprotein C-II
P33622	Mus musculus	potential	Apolipoprotein C-III
Q61268	Mus musculus	potential	Apolipoprotein C-IV
P51910	Mus musculus	by similarity	Apolipoprotein D
P08226	Mus musculus	confirmed	Apolipoprotein E
Q91V80	Mus musculus	potential	Apolipoprotein F
Q9Z1R3	Mus musculus	potential	Apolipoprotein M
Q78IK4	Mus musculus	potential	Apolipoprotein O-like
Q6PGD0	Mus musculus	by similarity	Apoptosis-related protein 3
Q9EQX0	Mus musculus	confirmed	Appetite-regulating hormone
Q8CC36	Mus musculus	potential	ARMET-like protein 1
Q9Z0L2	Mus musculus	potential	Artemin
P50428	Mus musculus	potential	Arylsulfatase A
P50429	Mus musculus	potential	Arylsulfatase B
Q3TYD4	Mus musculus	potential	Arylsulfatase G
Q32KI9	Mus musculus	potential	Arylsulfatase I
Q8BM89	Mus musculus	potential	Arylsulfatase J
Q9D2L1	Mus musculus	potential	Arylsulfatase K
Q99MQ4	Mus musculus	potential	Asporin
Q6HA09	Mus musculus	potential	Astacin-like metalloendopeptidase
Q61137	Mus musculus	potential	Astrotactin-1
Q80Z10	Mus musculus	potential	Astrotactin-2
Q9ERA8	Mus musculus	potential	ATP synthase gamma chain
Q9JJ59	Mus musculus	potential	ATP-binding cassette sub-family B member 9
P05125	Mus musculus	potential	Atrial natriuretic factor
P70180	Mus musculus	potential	Atrial natriuretic peptide clearance receptor
P18293	Mus musculus	confirmed	Atrial natriuretic peptide receptor A
Q6VVW5	Mus musculus	potential	Atrial natriuretic peptide receptor B
Q9WU60	Mus musculus	by similarity	Attractin
Q6A051	Mus musculus	potential	Attractin-like protein 1
Q99LS0	Mus musculus	potential	Augurin
Q7TSA3	Mus musculus	potential	B- and T-lymphocyte attenuator
Q67E05	Mus musculus	potential	Bactericidal permeability-increasing protein
Q8C1E1	Mus musculus	potential	Bactericidal/permeability-increasing protein-like 1
Q8C186	Mus musculus	potential	Bactericidal/permeability-increasing protein-like 2
Q8BU51	Mus musculus	potential	Bactericidal/permeability-increasing protein-like 3
Q05793	Mus musculus	potential	Basement membrane-specific heparan sulfate proteoglycan core protein
P16092	Mus musculus	potential	Basic fibroblast growth factor receptor 1
P18572	Mus musculus	confirmed	Basigin
P11911	Mus musculus	confirmed	B-cell antigen receptor complex-associated protein alpha-chain
P15530	Mus musculus	confirmed	B-cell antigen receptor complex-associated protein beta-chain
P35329	Mus musculus	potential	B-cell receptor CD22
P15209	Mus musculus	confirmed	BDNF/NT-3 growth factors receptor
Q6LDL0	Mus musculus	potential	Beta-1
Q01339	Mus musculus	confirmed	Beta-2-glycoprotein 1
P01887	Mus musculus	confirmed	Beta-2-microglobulin
Q71V84	Mus musculus	potential	Beta3 integrin
P10598	Mus musculus	by similarity	Beta-casein
P56386	Mus musculus	potential	Beta-defensin 1
Q8R2I8	Mus musculus	potential	Beta-defensin 10
Q8R2I7	Mus musculus	potential	Beta-defensin 11
Q8K4N3	Mus musculus	potential	Beta-defensin 12
Q8R2I4	Mus musculus	potential	Beta-defensin 13
Q7TNV9	Mus musculus	potential	Beta-defensin 14
Q8R2I5	Mus musculus	potential	Beta-defensin 15
Q30KP6	Mus musculus	potential	Beta-defensin 17
Q30KP5	Mus musculus	potential	Beta-defensin 18
Q8K3I8	Mus musculus	potential	Beta-defensin 19
P82020	Mus musculus	potential	Beta-defensin 2
Q30KP3	Mus musculus	potential	Beta-defensin 20
Q30KN8	Mus musculus	potential	Beta-defensin 25
Q8BGW9	Mus musculus	potential	Beta-defensin 29
Q9WTL0	Mus musculus	potential	Beta-defensin 3
Q30KN4	Mus musculus	potential	Beta-defensin 30
Q30KN3	Mus musculus	potential	Beta-defensin 33
Q7TNV8	Mus musculus	potential	Beta-defensin 34
Q8R2I3	Mus musculus	potential	Beta-defensin 35
Q8K3U4	Mus musculus	potential	Beta-defensin 36
Q7TMD2	Mus musculus	potential	Beta-defensin 37
Q7TNV7	Mus musculus	potential	Beta-defensin 38
Q70KL3	Mus musculus	potential	Beta-defensin 39
P82019	Mus musculus	potential	Beta-defensin 4
Q70KL2	Mus musculus	potential	Beta-defensin 40
Q8C1G4	Mus musculus	potential	Beta-defensin 41
Q30KM9	Mus musculus	potential	Beta-defensin 43
Q9EPV9	Mus musculus	potential	Beta-defensin 5
Q6TU36	Mus musculus	potential	Beta-defensin 50
Q91VD6	Mus musculus	potential	Beta-defensin 6
Q91V70	Mus musculus	potential	Beta-defensin 7
Q91V82	Mus musculus	potential	Beta-defensin 8
Q8R2I6	Mus musculus	potential	Beta-defensin 9
P23780	Mus musculus	potential	Beta-galactosidase
Q8VC60	Mus musculus	potential	Beta-galactosidase-1-like protein
Q3UPY5	Mus musculus	potential	Beta-galactosidase-1-like protein 2
P12265	Mus musculus	confirmed	Beta-glucuronidase
P29416	Mus musculus	by similarity	Beta-hexosaminidase subunit alpha
P20060	Mus musculus	potential	Beta-hexosaminidase subunit beta
Q8K2I4	Mus musculus	potential	Beta-mannosidase
O08540	Mus musculus	potential	Beta-microseminoprotein
O35417	Mus musculus	potential	Beta-neoendorphin-dynorphin
P01139	Mus musculus	potential	Beta-nerve growth factor
P56818	Mus musculus	potential	Beta-secretase 1
O08524	Mus musculus	potential	Beta-tectorin
P05622	Mus musculus	confirmed	Beta-type platelet-derived growth factor receptor
P28653	Mus musculus	potential	Biglycan
Q64285	Mus musculus	by similarity	Bile salt-activated lipase
Q61352	Mus musculus	potential	Biliary glycoprotein
Q61354	Mus musculus	potential	Biliary glycoprotein
Q61351	Mus musculus	potential	Biliary glycoprotein
Q61350	Mus musculus	potential	Biliary glycoprotein
Q8CIF4	Mus musculus	by similarity	Biotinidase
P25918	Mus musculus	confirmed	B-lymphocyte antigen CD19
Q9D0L6	Mus musculus	potential	BMP and activin membrane-bound inhibitor homolog
Q8CJ69	Mus musculus	potential	BMP-binding endothelial regulator protein
Q61878	Mus musculus	potential	Bone marrow proteoglycan
P98063	Mus musculus	potential	Bone morphogenetic protein 1
Q9R229	Mus musculus	potential	Bone morphogenetic protein 10
Q9Z0L4	Mus musculus	potential	Bone morphogenetic protein 15
P21274	Mus musculus	potential	Bone morphogenetic protein 2
Q8BHE5	Mus musculus	potential	Bone morphogenetic protein 3
P21275	Mus musculus	potential	Bone morphogenetic protein 4
P49003	Mus musculus	potential	Bone morphogenetic protein 5
P20722	Mus musculus	potential	Bone morphogenetic protein 6
P23359	Mus musculus	potential	Bone morphogenetic protein 7
P34821	Mus musculus	potential	Bone morphogenetic protein 8A
P55105	Mus musculus	potential	Bone morphogenetic protein 8B
P36895	Mus musculus	potential	Bone morphogenetic protein receptor type-1A
P36898	Mus musculus	potential	Bone morphogenetic protein receptor type-1B
O35607	Mus musculus	potential	Bone morphogenetic protein receptor type-2
Q61711	Mus musculus	by similarity	Bone sialoprotein 2
Q3UW26	Mus musculus	potential	Bovine seminal plasma protein homolog 1
P21237	Mus musculus	potential	Brain-derived neurotrophic factor
Q3UHD1	Mus musculus	potential	Brain-specific angiogenesis inhibitor 1
Q8CGM1	Mus musculus	potential	Brain-specific angiogenesis inhibitor 2
Q80ZF8	Mus musculus	potential	Brain-specific angiogenesis inhibitor 3
Q9ER10	Mus musculus	potential	Brain-specific serine protease 4
Q61361	Mus musculus	potential	Brevican core protein
Q8C8N3	Mus musculus	potential	Brorin
Q6AZB0	Mus musculus	potential	Brother of CDO
Q9DB72	Mus musculus	potential	BTB/POZ domain-containing protein 17
Q62556	Mus musculus	potential	Butyrophilin subfamily 1 member A1
Q7TST0	Mus musculus	potential	Butyrophilin-like protein 1
O88992	Mus musculus	potential	C1q-related factor
P08607	Mus musculus	confirmed	C4b-binding protein
Q8K3I1	Mus musculus	potential	Ca155-c2-neg228 protein
O35161	Mus musculus	potential	Cadherin EGF LAG seven-pass G-type receptor 1
Q9R0M0	Mus musculus	potential	Cadherin EGF LAG seven-pass G-type receptor 2
Q91ZI0	Mus musculus	potential	Cadherin EGF LAG seven-pass G-type receptor 3
P70408	Mus musculus	potential	Cadherin-10
P55288	Mus musculus	potential	Cadherin-11
Q5RJH3	Mus musculus	potential	Cadherin-12
Q9WTR5	Mus musculus	potential	Cadherin-13
P33146	Mus musculus	potential	Cadherin-15
O88338	Mus musculus	potential	Cadherin-16
Q9R100	Mus musculus	confirmed	Cadherin-17
P15116	Mus musculus	potential	Cadherin-2
Q9Z0M3	Mus musculus	potential	Cadherin-20
Q9WTP5	Mus musculus	potential	Cadherin-22
Q99PF4	Mus musculus	potential	Cadherin-23
Q6PFX6	Mus musculus	potential	Cadherin-24
P10287	Mus musculus	potential	Cadherin-3
P39038	Mus musculus	potential	Cadherin-4
P55284	Mus musculus	potential	Cadherin-5
P97326	Mus musculus	potential	Cadherin-6
Q8BM92	Mus musculus	potential	Cadherin-7
P97291	Mus musculus	potential	Cadherin-8
P70407	Mus musculus	potential	Cadherin-9
P59862	Mus musculus	potential	Cadherin-like protein 26
Q8BL00	Mus musculus	potential	Cadherin-like protein 28
P70160	Mus musculus	potential	Calcitonin
Q99JA0	Mus musculus	potential	Calcitonin gene-related peptide 1
Q99MP3	Mus musculus	potential	Calcitonin gene-related peptide 2
Q9R1W5	Mus musculus	potential	Calcitonin gene-related peptide type 1 receptor
Q60755	Mus musculus	potential	Calcitonin receptor
Q9D7Z6	Mus musculus	potential	Calcium-activated chloride channel regulator 1
Q8BG22	Mus musculus	potential	Calcium-activated chloride channel regulator 2
Q6Q473	Mus musculus	potential	Calcium-activated chloride channel regulator 4
P97391	Mus musculus	potential	Calcium-dependent phospholipase A2
P52194	Mus musculus	potential	Calmegin
P35564	Mus musculus	potential	Calnexin
P14211	Mus musculus	confirmed	Calreticulin
Q9D9Q6	Mus musculus	potential	Calreticulin-3
O09165	Mus musculus	by similarity	Calsequestrin-1
O09161	Mus musculus	potential	Calsequestrin-2
Q9EPL2	Mus musculus	by similarity	Calsyntenin-1
Q9ER65	Mus musculus	potential	Calsyntenin-2
Q99JH7	Mus musculus	potential	Calsyntenin-3
O35887	Mus musculus	by similarity	Calumenin
Q64389	Mus musculus	potential	CAMPATH-1 antigen
Q9CZ42	Mus musculus	potential	Carbohydrate kinase domain-containing protein
Q8CI85	Mus musculus	potential	Carbonic anhydrase 12
Q9WVT6	Mus musculus	potential	Carbonic anhydrase 14
Q99N23	Mus musculus	potential	Carbonic anhydrase 15
Q64444	Mus musculus	potential	Carbonic anhydrase 4
P18761	Mus musculus	confirmed	Carbonic anhydrase 6
Q8VHB5	Mus musculus	potential	Carbonic anhydrase 9
O70354	Mus musculus	potential	Carbonic anhydrase-related protein 11
Q8VCT4	Mus musculus	confirmed	Carboxylesterase 3
Q6AW46	Mus musculus	potential	Carboxylesterase 7
Q8R0W5	Mus musculus	potential	Carboxylesterase UNQ440/PRO873 homolog
Q7TPZ8	Mus musculus	by similarity	Carboxypeptidase A1
Q504N0	Mus musculus	potential	Carboxypeptidase A2
Q6P8K8	Mus musculus	potential	Carboxypeptidase A4
Q8R4H4	Mus musculus	potential	Carboxypeptidase A5
Q5U901	Mus musculus	potential	Carboxypeptidase A6
Q9JHH6	Mus musculus	potential	Carboxypeptidase B2
O89001	Mus musculus	potential	Carboxypeptidase D
Q00493	Mus musculus	by similarity	Carboxypeptidase E
Q80V42	Mus musculus	potential	Carboxypeptidase M
Q9JJN5	Mus musculus	potential	Carboxypeptidase N catalytic chain
Q9DBB9	Mus musculus	potential	Carboxypeptidase N subunit 2
Q8R4V4	Mus musculus	potential	Carboxypeptidase Z
Q9D2L5	Mus musculus	potential	Carboxypeptidase-like protein X2
Q99232	Mus musculus	potential	Carcinoembryonic antigen family member protein
P31809	Mus musculus	confirmed	Carcinoembryonic antigen-related cell adhesion molecule 1
Q61400	Mus musculus	confirmed	Carcinoembryonic antigen-related cell adhesion molecule 10
Q9D871	Mus musculus	potential	Carcinoembryonic antigen-related cell adhesion molecule 18
Q925P2	Mus musculus	potential	Carcinoembryonic antigen-related cell adhesion molecule 2
P83714	Mus musculus	potential	Cardiotrophin-2
Q9QZM3	Mus musculus	potential	Cardiotrophin-like cytokine factor 1
Q8R555	Mus musculus	potential	Cartilage acidic protein 1
Q66K08	Mus musculus	potential	Cartilage intermediate layer protein 1
P51942	Mus musculus	potential	Cartilage matrix protein
Q9R0G6	Mus musculus	potential	Cartilage oligomeric matrix protein
Q9CYD3	Mus musculus	potential	Cartilage-associated protein
Q7TN73	Mus musculus	potential	CAS1 domain-containing protein 1
Q91WM2	Mus musculus	potential	Cat eye syndrome critical region protein 5 homolog
P51437	Mus musculus	potential	Cathelin-related antimicrobial peptide
Q91ZF2	Mus musculus	potential	Cathepsin 7
P10605	Mus musculus	potential	Cathepsin B
P18242	Mus musculus	potential	Cathepsin D
P70269	Mus musculus	by similarity	Cathepsin E
Q9R013	Mus musculus	potential	Cathepsin F
P28293	Mus musculus	by similarity	Cathepsin G
P49935	Mus musculus	potential	Cathepsin H
Q9R014	Mus musculus	potential	Cathepsin J
P55097	Mus musculus	potential	Cathepsin K
P06797	Mus musculus	confirmed	Cathepsin L1
Q9JL96	Mus musculus	potential	Cathepsin M
Q8BM88	Mus musculus	potential	Cathepsin O
Q91ZF4	Mus musculus	potential	Cathepsin Q
Q9JIA9	Mus musculus	potential	Cathepsin R
O70370	Mus musculus	potential	Cathepsin S
P56203	Mus musculus	potential	Cathepsin W
Q9WUU7	Mus musculus	potential	Cathepsin Z
Q91ZD5	Mus musculus	potential	Cathepsin-3
P24668	Mus musculus	confirmed	Cation-dependent mannose-6-phosphate receptor
Q07113	Mus musculus	potential	Cation-independent mannose-6-phosphate receptor
Q546S6	Mus musculus	potential	CC chemokine DC/B-CK
P47774	Mus musculus	potential	C-C chemokine receptor type 7
P10146	Mus musculus	potential	C-C motif chemokine 1
Q62401	Mus musculus	by similarity	C-C motif chemokine 12
O70460	Mus musculus	potential	C-C motif chemokine 19
P10148	Mus musculus	by similarity	C-C motif chemokine 2
O89093	Mus musculus	confirmed	C-C motif chemokine 20
P84443	Mus musculus	potential	C-C motif chemokine 21a
P84444	Mus musculus	potential	C-C motif chemokine 21b
O88430	Mus musculus	potential	C-C motif chemokine 22
Q9JKC0	Mus musculus	potential	C-C motif chemokine 24
O35903	Mus musculus	potential	C-C motif chemokine 25
Q9Z1X0	Mus musculus	potential	C-C motif chemokine 27
Q9JIL2	Mus musculus	potential	C-C motif chemokine 28
P10855	Mus musculus	confirmed	C-C motif chemokine 3
P14097	Mus musculus	confirmed	C-C motif chemokine 4
P30882	Mus musculus	potential	C-C motif chemokine 5
P27784	Mus musculus	potential	C-C motif chemokine 6
Q03366	Mus musculus	potential	C-C motif chemokine 7
Q9Z121	Mus musculus	potential	C-C motif chemokine 8
P51670	Mus musculus	potential	C-C motif chemokine 9
Q8R422	Mus musculus	by similarity	CD109 antigen
EGW06594	Mus musculus	potential	CD109 antigen
O88875	Mus musculus	potential	CD160 antigen
Q9D6W7	Mus musculus	by similarity	CD164 sialomucin-like 2 protein
Q61490	Mus musculus	potential	CD166 antigen
Q62192	Mus musculus	confirmed	CD180 antigen
Q8K4F0	Mus musculus	potential	CD226 antigen
P41272	Mus musculus	potential	CD27 antigen
Q8VE98	Mus musculus	potential	CD276 antigen
EGW02115	Mus musculus	potential	CD276 antigen
Q9DCG2	Mus musculus	potential	CD302 antigen
Q9Z1P5	Mus musculus	potential	CD320 antigen
P15379	Mus musculus	by similarity	CD44 antigen
P18181	Mus musculus	confirmed	CD48 antigen
Q9QWK4	Mus musculus	potential	CD5 antigen-like
O55186	Mus musculus	potential	CD59A glycoprotein
P58019	Mus musculus	potential	CD59B glycoprotein
Q9Z0M6	Mus musculus	potential	CD97 antigen
Q8VCN6	Mus musculus	potential	CD99 antigen
Q8BIF0	Mus musculus	potential	CD99 antigen-like protein 2
Q8R5M8	Mus musculus	potential	Cell adhesion molecule 1
Q8BLQ9	Mus musculus	potential	Cell adhesion molecule 2
Q99N28	Mus musculus	by similarity	Cell adhesion molecule 3
Q8R464	Mus musculus	potential	Cell adhesion molecule 4
Q32MD9	Mus musculus	potential	Cell adhesion molecule-related/down-regulated by oncogenes
Q9JKA5	Mus musculus	potential	Cell surface A33 antigen
Q9ES57	Mus musculus	potential	Cell surface glycoprotein CD200 receptor 1
Q6XJV6	Mus musculus	potential	Cell surface glycoprotein CD200 receptor 2
Q5UKY4	Mus musculus	potential	Cell surface glycoprotein CD200 receptor 3
Q6XJV4	Mus musculus	potential	Cell surface glycoprotein CD200 receptor 4
Q8BTP3	Mus musculus	potential	Cell surface glycoprotein CD200 receptor 5
Q8R2Y2	Mus musculus	by similarity	Cell surface glycoprotein MUC18
Q31187	Mus musculus	potential	Cell surface glycoprotein precursor (H2-Ab1
O55233	Mus musculus	by similarity	Cerberus
Q9R171	Mus musculus	potential	Cerebellin-1
Q9JHG0	Mus musculus	potential	Cerebellin-3
Q8BME9	Mus musculus	potential	Cerebellin-4
Q3UMW8	Mus musculus	potential	Ceroid-lipofuscinosis neuronal protein 5 homolog
Q61147	Mus musculus	by similarity	Ceruloplasmin
Q922Q9	Mus musculus	potential	Chitinase domain-containing protein 1
Q61362	Mus musculus	potential	Chitinase-3-like protein 1
O35744	Mus musculus	confirmed	Chitinase-3-like protein 3
Q91Z98	Mus musculus	confirmed	Chitinase-3-like protein 4
Q9D7Q1	Mus musculus	by similarity	Chitotriosidase-1
Q99LI2	Mus musculus	potential	Chloride channel CLIC-like protein 1
P09240	Mus musculus	by similarity	Cholecystokinin
Q03311	Mus musculus	confirmed	Cholinesterase
O55226	Mus musculus	potential	Chondroadherin
Q8VHY0	Mus musculus	potential	Chondroitin sulfate proteoglycan 4
Q71M36	Mus musculus	potential	Chondroitin sulfate proteoglycan 5
Q9CXM0	Mus musculus	potential	Chondrolectin
Q9Z0E2	Mus musculus	potential	Chordin
Q920C1	Mus musculus	potential	Chordin-like protein 1
Q8VEA6	Mus musculus	by similarity	Chordin-like protein 2
P26339	Mus musculus	confirmed	Chromogranin-A
P21844	Mus musculus	potential	Chymase
Q3SYP2	Mus musculus	potential	Chymotrypsin-C
Q9CR35	Mus musculus	by similarity	Chymotrypsinogen B
O88507	Mus musculus	potential	Ciliary neurotrophic factor receptor alpha
Q61643	Mus musculus	potential	Class I major histocompatability complex protein
P28078	Mus musculus	potential	Class II histocompatibility antigen, M alpha chain
P35737	Mus musculus	potential	Class II histocompatibility antigen, M beta 1 chain
Q06890	Mus musculus	by similarity	Clusterin
Q549A5	Mus musculus	potential	Clusterin
Q3ZRW6	Mus musculus	potential	Clusterin-like protein 1
Q7TSN2	Mus musculus	potential	CMRF35-like molecule
Q6SJQ7	Mus musculus	potential	CMRF35-like molecule 1
Q8K249	Mus musculus	potential	CMRF35-like molecule 2
Q6SJQ5	Mus musculus	potential	CMRF35-like molecule 3
Q8VCH2	Mus musculus	potential	CMRF35-like molecule 5
A2A7V7	Mus musculus	potential	CMRF35-like molecule 6
Q3U497	Mus musculus	potential	CMRF35-like molecule 7
Q6SJQ0	Mus musculus	potential	CMRF35-like molecule 8
Q1ERP8	Mus musculus	by similarity	CMRF35-like molecule 9
P16294	Mus musculus	potential	Coagulation factor IX
O88783	Mus musculus	potential	Coagulation factor V
P70375	Mus musculus	potential	Coagulation factor VII
Q06194	Mus musculus	potential	Coagulation factor VIII
O88947	Mus musculus	potential	Coagulation factor X
Q91Y47	Mus musculus	by similarity	Coagulation factor XI
Q07968	Mus musculus	by similarity	Coagulation factor XIII B chain
P56388	Mus musculus	potential	Cocaine- and amphetamine-regulated transcript protein
Q62507	Mus musculus	potential	Cochlin
Q9DCC3	Mus musculus	potential	Coiled-coil domain-containing protein 107
Q8BIS8	Mus musculus	potential	Coiled-coil domain-containing protein 126
Q8C7V8	Mus musculus	potential	Coiled-coil domain-containing protein 134
Q9D6Y1	Mus musculus	potential	Coiled-coil domain-containing protein 3
Q9D024	Mus musculus	potential	Coiled-coil domain-containing protein 47
Q9D9B0	Mus musculus	potential	Coiled-coil domain-containing protein 70
Q8R2G6	Mus musculus	potential	Coiled-coil domain-containing protein 80
Q9CQC2	Mus musculus	by similarity	Colipase
Q3UW21	Mus musculus	potential	Colipase-like protein C6orf126 homolog
P11087	Mus musculus	confirmed	Collagen alpha-1(I) chain
P28481	Mus musculus	potential	Collagen alpha-1(II) chain
P08121	Mus musculus	by similarity	Collagen alpha-1(III) chain
P02463	Mus musculus	confirmed	Collagen alpha-1(IV) chain
Q05722	Mus musculus	potential	Collagen alpha-1(IX) chain
O88207	Mus musculus	potential	Collagen alpha-1(V) chain
Q04857	Mus musculus	confirmed	Collagen alpha-1(VI) chain
Q63870	Mus musculus	potential	Collagen alpha-1(VII) chain
Q00780	Mus musculus	potential	Collagen alpha-1(VIII) chain
Q05306	Mus musculus	potential	Collagen alpha-1(X) chain
Q61245	Mus musculus	potential	Collagen alpha-1(XI) chain
Q60847	Mus musculus	potential	Collagen alpha-1(XII) chain
Q80X19	Mus musculus	potential	Collagen alpha-1(XIV) chain
Q0VF58	Mus musculus	potential	Collagen alpha-1(XIX) chain
O35206	Mus musculus	potential	Collagen alpha-1(XV) chain
Q8BLX7	Mus musculus	potential	Collagen alpha-1(XVI) chain
P39061	Mus musculus	potential	Collagen alpha-1(XVIII) chain
Q30D77	Mus musculus	potential	Collagen alpha-1(XXIV) chain
Q91VF6	Mus musculus	potential	Collagen alpha-1(XXVI) chain
Q5QNQ9	Mus musculus	potential	Collagen alpha-1(XXVII) chain
Q2UY11	Mus musculus	potential	Collagen alpha-1(XXVIII) chain
Q01149	Mus musculus	potential	Collagen alpha-2(I) chain
P08122	Mus musculus	confirmed	Collagen alpha-2(IV) chain
Q07643	Mus musculus	potential	Collagen alpha-2(IX) chain
Q3U962	Mus musculus	potential	Collagen alpha-2(V) chain
Q02788	Mus musculus	potential	Collagen alpha-2(VI) chain
P25318	Mus musculus	potential	Collagen alpha-2(VIII) chain
Q64739	Mus musculus	potential	Collagen alpha-2(XI) chain
Q9QZS0	Mus musculus	potential	Collagen alpha-3(IV) chain
Q9Z0I9	Mus musculus	potential	Collagen alpha3(VI)
Q9QZR9	Mus musculus	potential	Collagen alpha-4(IV) chain
A2AX52	Mus musculus	potential	Collagen alpha-4(VI) chain
A6H584	Mus musculus	potential	Collagen alpha-5(VI) chain
Q8C6K9	Mus musculus	potential	Collagen alpha-6(VI) chain
Q3MI99	Mus musculus	potential	Collagen and calcium-binding EGF domain-containing protein 1
Q9D1D6	Mus musculus	potential	Collagen triple helix repeat-containing protein 1
P33435	Mus musculus	potential	Collagenase 3
Q8CF98	Mus musculus	potential	Collectin-10
Q3SXB8	Mus musculus	potential	Collectin-11
Q9ESG4	Mus musculus	potential	Collectrin
P98086	Mus musculus	by similarity	Complement C1q subcomponent subunit A
P14106	Mus musculus	confirmed	Complement C1q subcomponent subunit B
Q02105	Mus musculus	confirmed	Complement C1q subcomponent subunit C
Q9QXP7	Mus musculus	potential	Complement C1q tumor necrosis factor-related protein 1
Q9D8U4	Mus musculus	potential	Complement C1q tumor necrosis factor-related protein 2
Q9ES30	Mus musculus	potential	Complement C1q tumor necrosis factor-related protein 3
Q8R066	Mus musculus	potential	Complement C1q tumor necrosis factor-related protein 4
Q8K479	Mus musculus	by similarity	Complement C1q tumor necrosis factor-related protein 5
Q6IR41	Mus musculus	potential	Complement C1q tumor necrosis factor-related protein 6
Q8BVD7	Mus musculus	potential	Complement C1q tumor necrosis factor-related protein 7
Q4ZJN1	Mus musculus	potential	Complement C1q tumor necrosis factor-related protein 9
Q8CFR0	Mus musculus	potential	Complement C1q-like protein 2
Q9ESN4	Mus musculus	potential	Complement C1q-like protein 3
Q4ZJM9	Mus musculus	potential	Complement C1q-like protein 4
Q3UZ09	Mus musculus	potential	Complement C1r subcomponent-like protein
Q8CG16	Mus musculus	by similarity	Complement C1r-A subcomponent
Q8CFG9	Mus musculus	by similarity	Complement C1r-B subcomponent
Q8CG14	Mus musculus	by similarity	Complement C1s-A subcomponent
Q8CFG8	Mus musculus	by similarity	Complement C1s-B subcomponent
P21180	Mus musculus	confirmed	Complement C2
P01027	Mus musculus	confirmed	Complement C3
P01029	Mus musculus	confirmed	Complement C4-B
P06684	Mus musculus	confirmed	Complement C5
O89103	Mus musculus	potential	Complement component C1q receptor
Q8K182	Mus musculus	potential	Complement component C8 alpha chain
Q8BH35	Mus musculus	potential	Complement component C8 beta chain
Q8VCG4	Mus musculus	potential	Complement component C8 gamma chain
P06683	Mus musculus	by similarity	Complement component C9
Q61476	Mus musculus	potential	Complement decay-accelerating factor transmembrane isoform
Q61475	Mus musculus	potential	Complement decay-accelerating factor, GPI-anchored
P04186	Mus musculus	by similarity	Complement factor B
P03953	Mus musculus	potential	Complement factor D
P06909	Mus musculus	by similarity	Complement factor H
Q0KHD2	Mus musculus	potential	Complement factor H-related protein C
Q0KHD3	Mus musculus	potential	Complement factor H-related protein C
Q61129	Mus musculus	potential	Complement factor I
P19070	Mus musculus	confirmed	Complement receptor type 2
Q64735	Mus musculus	potential	Complement regulatory protein Crry
P98064	Mus musculus	confirmed	Complement-activating component of Ra-reactive factor
P29268	Mus musculus	potential	Connective tissue growth factor
Q0V8T9	Mus musculus	potential	Contactin associated protein like 5-1
Q0V8T8	Mus musculus	potential	Contactin associated protein like 5-2
Q0V8T7	Mus musculus	potential	Contactin associated protein like 5-3
P12960	Mus musculus	confirmed	Contactin-1
Q61330	Mus musculus	by similarity	Contactin-2
Q07409	Mus musculus	potential	Contactin-3
Q69Z26	Mus musculus	potential	Contactin-4
P68500	Mus musculus	potential	Contactin-5
Q9JMB8	Mus musculus	potential	Contactin-6
O54991	Mus musculus	potential	Contactin-associated protein 1
Q9CPW0	Mus musculus	potential	Contactin-associated protein-like 2
Q99P47	Mus musculus	potential	Contactin-associated protein-like 4
Q7TPC1	Mus musculus	potential	Corneodesmosin
Q8CIT0	Mus musculus	potential	Corticoliberin
Q06770	Mus musculus	by similarity	Corticosteroid-binding globulin
P01193	Mus musculus	by similarity	Corticotropin-lipotropin
P35347	Mus musculus	potential	Corticotropin-releasing factor receptor 1
Q60748	Mus musculus	potential	Corticotropin-releasing factor receptor 2
Q60571	Mus musculus	by similarity	Corticotropin-releasing factor-binding protein
P56469	Mus musculus	potential	Cortistatin
P97792	Mus musculus	potential	Coxsackievirus and adenovirus receptor homolog
P14847	Mus musculus	confirmed	C-reactive protein
Q8VHS2	Mus musculus	potential	Crumbs homolog 1
Q80YA8	Mus musculus	potential	Crumbs homolog 2
Q8QZT4	Mus musculus	potential	Crumbs protein homolog 3
Q70LV4	Mus musculus	potential	Cryptdin related sequence peptide
Q70LV8	Mus musculus	potential	Cryptdin related sequence peptide
Q70LV3	Mus musculus	potential	Cryptdin related sequence peptide
Q70LU7	Mus musculus	potential	Cryptdin related sequence peptide
Q70LU4	Mus musculus	potential	Cryptdin related sequence peptide
Q70LV5	Mus musculus	potential	Cryptdin related sequence peptide
Q70LV7	Mus musculus	potential	Cryptdin related sequence peptide
Q70LV6	Mus musculus	potential	Cryptdin related sequence peptide
Q70LV9	Mus musculus	potential	Cryptdin related sequence peptide
Q70LU6	Mus musculus	potential	Cryptdin related sequence peptide
Q70LU8	Mus musculus	potential	Cryptdin related sequence peptide
Q70LV2	Mus musculus	potential	Cryptdin related sequence peptide
Q70LV0	Mus musculus	potential	Cryptdin related sequence peptide
Q70LU3	Mus musculus	potential	Cryptdin related sequence peptide
Q70LV1	Mus musculus	potential	Cryptdin related sequence peptide
Q70LU5	Mus musculus	potential	Cryptdin related sequence peptide
P97766	Mus musculus	potential	Cryptic protein
O88200	Mus musculus	by similarity	C-type lectin domain family 11 member A
Q8VCP9	Mus musculus	potential	C-type lectin domain family 14 member A
Q9EPW4	Mus musculus	potential	C-type lectin domain family 3 member A
Q64449	Mus musculus	potential	C-type mannose receptor 2
Q61839	Mus musculus	potential	C-type natriuretic peptide
Q923L3	Mus musculus	potential	CUB and sushi domain-containing protein 1
Q80T79	Mus musculus	potential	CUB and sushi domain-containing protein 3
P70412	Mus musculus	potential	CUB and zona pellucida-like domain-containing protein 1
Q5U462	Mus musculus	potential	CUB domain-containing protein 1
Q8BQH6	Mus musculus	potential	CUB domain-containing protein 2
Q9JLB4	Mus musculus	potential	Cubilin
Q9WUQ5	Mus musculus	potential	C-X-C motif chemokine
P17515	Mus musculus	potential	C-X-C motif chemokine 10
Q9JHH5	Mus musculus	by similarity	C-X-C motif chemokine 11
O55038	Mus musculus	confirmed	C-X-C motif chemokine 13
Q9WUQ5	Mus musculus	potential	C-X-C motif chemokine 14
Q9WVL7	Mus musculus	potential	C-X-C motif chemokine 15
Q8BSU2	Mus musculus	confirmed	C-X-C motif chemokine 16
P10889	Mus musculus	confirmed	C-X-C motif chemokine 2
Q6W5C0	Mus musculus	by similarity	C-X-C motif chemokine 3
P50228	Mus musculus	confirmed	C-X-C motif chemokine 5
P18340	Mus musculus	confirmed	C-X-C motif chemokine 9
Q62287	Mus musculus	potential	Cyritestin
Q6IE34	Mus musculus	potential	Cystatin ap4
Q6IE35	Mus musculus	potential	Cystatin ap5
Q9D269	Mus musculus	potential	Cystatin-11
Q9DAN8	Mus musculus	potential	Cystatin-12
Q80ZN5	Mus musculus	potential	Cystatin-13
Q8VII3	Mus musculus	potential	Cystatin-14
P32766	Mus musculus	potential	Cystatin-8
Q9Z0H6	Mus musculus	potential	Cystatin-9
P21460	Mus musculus	confirmed	Cystatin-C
O89098	Mus musculus	potential	Cystatin-F
Q8VIH7	Mus musculus	potential	Cysteine and tyrosine-rich protein 1
Q9JLL0	Mus musculus	potential	Cysteine-rich motor neuron 1 protein
Q3U492	Mus musculus	potential	Cysteine-rich motor neuron 2 protein
Q03401	Mus musculus	confirmed	Cysteine-rich secretory protein 1
P16563	Mus musculus	potential	Cysteine-rich secretory protein 2
Q03402	Mus musculus	confirmed	Cysteine-rich secretory protein 3
Q8CGD2	Mus musculus	potential	Cysteine-rich secretory protein LCCL domain-containing 1
Q91XD7	Mus musculus	potential	Cysteine-rich with EGF-like domain protein 1
Q9CYA0	Mus musculus	potential	Cysteine-rich with EGF-like domain protein 2
P34902	Mus musculus	by similarity	Cytokine receptor common gamma chain
P26955	Mus musculus	potential	Cytokine receptor common subunit beta
Q9JM58	Mus musculus	potential	Cytokine receptor-like factor 1
Q8CII9	Mus musculus	potential	Cytokine receptor-like factor 2
Q149L7	Mus musculus	potential	Cytotoxic and regulatory T-cell molecule
P09793	Mus musculus	potential	Cytotoxic T-lymphocyte protein 4
Q76LW6	Mus musculus	potential	DAN domain family member 5
Q9CXI3	Mus musculus	potential	DBH-like monooxygenase protein 1
Q7TT41	Mus musculus	potential	DBH-like monooxygenase protein 2
P28654	Mus musculus	potential	Decorin
Q2F9P8	Mus musculus	potential	DEFB21
P11477	Mus musculus	potential	Defensin-1
P50708	Mus musculus	potential	Defensin-related cryptdin-10
P50709	Mus musculus	potential	Defensin-related cryptdin-11
P50711	Mus musculus	potential	Defensin-related cryptdin-13
P50712	Mus musculus	potential	Defensin-related cryptdin-14
P50713	Mus musculus	potential	Defensin-related cryptdin-15
P50714	Mus musculus	potential	Defensin-related cryptdin-16
Q64016	Mus musculus	potential	Defensin-related cryptdin-17
P28309	Mus musculus	potential	Defensin-related cryptdin-2
Q45VN2	Mus musculus	potential	Defensin-related cryptdin-20
Q8C1P2	Mus musculus	potential	Defensin-related cryptdin-21
Q8C1N8	Mus musculus	potential	Defensin-related cryptdin-22
Q5G866	Mus musculus	potential	Defensin-related cryptdin-23
Q5G865	Mus musculus	potential	Defensin-related cryptdin-24
Q5G864	Mus musculus	potential	Defensin-related cryptdin-25
Q3L180	Mus musculus	potential	Defensin-related cryptdin-26
P28310	Mus musculus	potential	Defensin-related cryptdin-3
P28311	Mus musculus	potential	Defensin-related cryptdin-4
P28312	Mus musculus	potential	Defensin-related cryptdin-5
P50704	Mus musculus	potential	Defensin-related cryptdin-6/12
P50705	Mus musculus	potential	Defensin-related cryptdin-7
P50706	Mus musculus	potential	Defensin-related cryptdin-8
P50707	Mus musculus	potential	Defensin-related cryptdin-9
P17533	Mus musculus	potential	Defensin-related cryptdin-related sequence 1
Q64263	Mus musculus	potential	Defensin-related cryptdin-related sequence 10
P50716	Mus musculus	potential	Defensin-related cryptdin-related sequence 12
P17534	Mus musculus	potential	Defensin-related cryptdin-related sequence 2
P50715	Mus musculus	potential	Defensin-related cryptdin-related sequence 7
Q3U0B3	Mus musculus	potential	Dehydrogenase/reductase SDR family member 11
Q5SS80	Mus musculus	potential	Dehydrogenase/reductase SDR family member 13
Q9CXR1	Mus musculus	potential	Dehydrogenase/reductase SDR family member 7
Q8CHS7	Mus musculus	potential	Dehydrogenase/reductase SDR family member 7C
Q58NB6	Mus musculus	potential	Dehydrogenase/reductase SDR family member 9
Q8VBZ0	Mus musculus	potential	Dehydrogenase/reductase SDR family member on chromosome X homolog
Q920P3	Mus musculus	potential	Deleted in bladder cancer protein 1 homolog
Q60997	Mus musculus	potential	Deleted in malignant brain tumors 1 protein
Q8JZM4	Mus musculus	potential	Delta and Notch-like epidermal growth factor-related receptor
Q61483	Mus musculus	potential	Delta-like protein 1
O88516	Mus musculus	potential	Delta-like protein 3
Q9JI71	Mus musculus	potential	Delta-like protein 4
O55188	Mus musculus	potential	Dentin matrix acidic phosphoprotein 1
Q5MJS3	Mus musculus	potential	Dentin matrix protein 4
P97399	Mus musculus	potential	Dentin sialophosphoprotein
O55070	Mus musculus	by similarity	Deoxyribonuclease gamma
Q712W5	Mus musculus	potential	Deoxyribonuclease I
P49183	Mus musculus	potential	Deoxyribonuclease-1
Q9D7J6	Mus musculus	potential	Deoxyribonuclease-1-like 1
Q9D1G0	Mus musculus	potential	Deoxyribonuclease-1-like 2
P56542	Mus musculus	potential	Deoxyribonuclease-2-alpha
Q9QY48	Mus musculus	potential	Deoxyribonuclease-2-beta
Q8BLI4	Mus musculus	potential	Dermatan-sulfate epimerase
Q0VBN2	Mus musculus	potential	Dermatan-sulfate epimerase-like protein
Q9QZZ6	Mus musculus	by similarity	Dermatopontin
Q6P253	Mus musculus	by similarity	Dermokine
Q61488	Mus musculus	potential	Desert hedgehog protein
P55849	Mus musculus	potential	Desmocollin-1
P55292	Mus musculus	potential	Desmocollin-2
P55850	Mus musculus	potential	Desmocollin-3
Q61495	Mus musculus	potential	Desmoglein-1-alpha
Q7TSF1	Mus musculus	potential	Desmoglein-1-beta
Q7TSF0	Mus musculus	potential	Desmoglein-1-gamma
O55111	Mus musculus	potential	Desmoglein-2
O35902	Mus musculus	potential	Desmoglein-3
Q7TMD7	Mus musculus	potential	Desmoglein-4
Q9QZL9	Mus musculus	potential	Dickkopf-like protein 1
O54908	Mus musculus	potential	Dickkopf-related protein 1
Q9QYZ8	Mus musculus	potential	Dickkopf-related protein 2
Q9QUN9	Mus musculus	potential	Dickkopf-related protein 3
Q8VEJ3	Mus musculus	potential	Dickkopf-related protein 4
Q3TNW5	Mus musculus	potential	Diffuse panbronchiolitis critical region protein 1 homolog
Q8R242	Mus musculus	by similarity	Di-N-acetylchitobiase
P31428	Mus musculus	by similarity	Dipeptidase 1
Q8C255	Mus musculus	potential	Dipeptidase 2
Q9DA79	Mus musculus	potential	Dipeptidase 3
P97821	Mus musculus	potential	Dipeptidyl-peptidase 1
Q9ET22	Mus musculus	potential	Dipeptidyl-peptidase 2
Q62371	Mus musculus	potential	Discoidin domain-containing receptor 2
Q9D4J3	Mus musculus	potential	Discoidin, CUB and LCCL domain-containing protein 1
Q91ZV3	Mus musculus	potential	Discoidin, CUB and LCCL domain-containing protein 2
Q60813	Mus musculus	potential	Disintegrin and metalloproteinase domain-containing protein 1a
Q8R534	Mus musculus	potential	Disintegrin and metalloproteinase domain-containing protein 1b
Q60718	Mus musculus	potential	Disintegrin and metalloproteinase domain-containing protein 2
Q3TTE0	Mus musculus	potential	Disintegrin and metalloproteinase domain-containing protein 5
O35227	Mus musculus	potential	Disintegrin and metalloproteinase domain-containing protein 7
Q99KV1	Mus musculus	by similarity	DnaJ homolog subfamily B member 11
Q9DC23	Mus musculus	potential	DnaJ homolog subfamily C member 10
Q80TN4	Mus musculus	potential	DnaJ homolog subfamily C member 16
Q91YW3	Mus musculus	potential	DnaJ homolog subfamily C member 3
O54734	Mus musculus	by similarity	Dolichyl-diphosphooligosaccharide--protein glycosyltransferase 48 kDa subunit
Q91YQ5	Mus musculus	by similarity	Dolichyl-diphosphooligosaccharide--protein glycosyltransferase subunit 1
Q9DBG6	Mus musculus	by similarity	Dolichyl-diphosphooligosaccharide--protein glycosyltransferase subunit 2
Q61641	Mus musculus	potential	Dq antigen
Q6PAL1	Mus musculus	potential	Draxin
Q9WUT8	Mus musculus	potential	DSD-1-proteoglycan
Q5SZV5	Mus musculus	potential	Dyslexia-associated protein KIAA0319 homolog
Q62165	Mus musculus	potential	Dystroglycan
Q31119	Mus musculus	potential	E beta 2
Q80TE3	Mus musculus	potential	E3 ubiquitin-protein ligase MARCH4
Q9D304	Mus musculus	potential	E3 ubiquitin-protein ligase RNF128
Q3U2C5	Mus musculus	potential	E3 ubiquitin-protein ligase RNF149
Q91XF4	Mus musculus	potential	E3 ubiquitin-protein ligase RNF167
Q9DBY1	Mus musculus	potential	E3 ubiquitin-protein ligase synoviolin
Q8R2G4	Mus musculus	potential	Ecto-ADP-ribosyltransferase 3
P70352	Mus musculus	potential	Ecto-ADP-ribosyltransferase 5
Q9WUZ9	Mus musculus	potential	Ectonucleoside triphosphate diphosphohydrolase 5
Q9R1E6	Mus musculus	by similarity	Ectonucleotide pyrophosphatase/phosphodiesterase family member 2
Q8BTJ4	Mus musculus	potential	Ectonucleotide pyrophosphatase/phosphodiesterase family member 4
Q9EQG7	Mus musculus	by similarity	Ectonucleotide pyrophosphatase/phosphodiesterase family member 5
Q8BGN3	Mus musculus	potential	Ectonucleotide pyrophosphatase/phosphodiesterase family member 6
Q923X1	Mus musculus	potential	EGF, latrophilin seven transmembrane domain-containing protein 1
Q8BPB5	Mus musculus	potential	EGF-containing fibulin-like extracellular matrix protein 1
Q9WVJ9	Mus musculus	potential	EGF-containing fibulin-like extracellular matrix protein 2
Q9JJZ5	Mus musculus	potential	EGF-like domain-containing protein 6
Q9QXT5	Mus musculus	potential	EGF-like domain-containing protein 7
Q6GUQ1	Mus musculus	potential	EGF-like domain-containing protein 8
Q8C088	Mus musculus	potential	EGF-like domain-containing protein C3orf50 homolog
Q61549	Mus musculus	potential	EGF-like module-containing mucin-like hormone receptor-like 1
Q91ZE5	Mus musculus	potential	EGF-like module-containing mucin-like hormone receptor-like 4
O35474	Mus musculus	potential	EGF-like repeat and discoidin I-like domain-containing protein 3
Q4VBE4	Mus musculus	potential	EGF-like, fibronectin type-III and laminin G-like domain-containing protein
Q8R1C3	Mus musculus	potential	EGFR-coamplified and overexpressed protein
P05208	Mus musculus	confirmed	Elastase-2A
P54320	Mus musculus	potential	Elastin
P21995	Mus musculus	potential	Embigin
P24823	Mus musculus	potential	Embryonic alkaline phosphatase
P20863	Mus musculus	potential	Embryonic growth/differentiation factor 1
Q91VF5	Mus musculus	potential	EMI domain-containing protein 1
Q99K41	Mus musculus	potential	EMILIN-1
Q8K482	Mus musculus	potential	EMILIN-2
P59900	Mus musculus	potential	EMILIN-3
Q9Z0M1	Mus musculus	potential	Enamel matrix serine proteinase 1
Q9JIS2	Mus musculus	potential	Enamel matrix serine proteinase 1
O55196	Mus musculus	potential	Enamelin
Q63961	Mus musculus	potential	Endoglin
Q9R0H2	Mus musculus	potential	Endomucin
Q8C522	Mus musculus	potential	Endonuclease domain-containing 1 protein
P57759	Mus musculus	by similarity	Endoplasmic reticulum protein ERp29
Q9D8U3	Mus musculus	potential	Endoplasmic reticulum resident protein ERp27
P08113	Mus musculus	potential	Endoplasmin
Q91V98	Mus musculus	potential	Endosialin
Q925F2	Mus musculus	by similarity	Endothelial cell-selective adhesion molecule
Q9QYY7	Mus musculus	potential	Endothelial cell-specific molecule 1
Q9WVG5	Mus musculus	potential	Endothelial lipase
Q64695	Mus musculus	potential	Endothelial protein C receptor
P48302	Mus musculus	potential	Endothelin B receptor
Q99JG2	Mus musculus	potential	Endothelin B receptor-like protein 2
P22387	Mus musculus	potential	Endothelin-1
Q61614	Mus musculus	potential	Endothelin-1 receptor
P22389	Mus musculus	potential	Endothelin-2
P48299	Mus musculus	potential	Endothelin-3
P97426	Mus musculus	potential	Eosinophil cationic protein 1
P97425	Mus musculus	potential	Eosinophil cationic protein 2
O35290	Mus musculus	potential	Eosinophil cationic-type ribonuclease 3
O35292	Mus musculus	potential	Eosinophil cationic-type ribonuclease 5
P49290	Mus musculus	potential	Eosinophil peroxidase
P48298	Mus musculus	potential	Eotaxin
Q60750	Mus musculus	potential	Ephrin type-A receptor 1
Q8BYG9	Mus musculus	potential	Ephrin type-A receptor 10
Q03145	Mus musculus	potential	Ephrin type-A receptor 2
P29319	Mus musculus	by similarity	Ephrin type-A receptor 3
Q03137	Mus musculus	potential	Ephrin type-A receptor 4
Q60629	Mus musculus	by similarity	Ephrin type-A receptor 5
Q62413	Mus musculus	potential	Ephrin type-A receptor 6
Q61772	Mus musculus	potential	Ephrin type-A receptor 7
O09127	Mus musculus	potential	Ephrin type-A receptor 8
Q8CBF3	Mus musculus	potential	Ephrin type-B receptor 1
P54763	Mus musculus	potential	Ephrin type-B receptor 2
P54754	Mus musculus	potential	Ephrin type-B receptor 3
P54761	Mus musculus	potential	Ephrin type-B receptor 4
O08644	Mus musculus	by similarity	Ephrin type-B receptor 6
P52793	Mus musculus	potential	Ephrin-A1
P52801	Mus musculus	potential	Ephrin-A2
O08545	Mus musculus	potential	Ephrin-A3
O08542	Mus musculus	potential	Ephrin-A4
O08543	Mus musculus	potential	Ephrin-A5
P52795	Mus musculus	potential	Ephrin-B1
P52800	Mus musculus	potential	Ephrin-B2
O35393	Mus musculus	potential	Ephrin-B3
Q01279	Mus musculus	potential	Epidermal growth factor receptor
P36368	Mus musculus	probable	Epidermal growth factor-binding protein type B
Q14B25	Mus musculus	potential	Epidermis-specific serine protease-like protein
P21765	Mus musculus	potential	Epididymal secretory glutathione peroxidase
Q9Z0J0	Mus musculus	potential	Epididymal secretory protein E1
Q810Z1	Mus musculus	potential	Epididymal-specific lipocalin-10
Q6JVL5	Mus musculus	potential	Epididymal-specific lipocalin-12
Q8K1H9	Mus musculus	potential	Epididymal-specific lipocalin-13
A2AJB7	Mus musculus	confirmed	Epididymal-specific lipocalin-5
Q924P3	Mus musculus	potential	Epididymal-specific lipocalin-8
Q9D267	Mus musculus	potential	Epididymal-specific lipocalin-9
O54782	Mus musculus	potential	Epididymis-specific alpha-mannosidase
Q924X1	Mus musculus	potential	Epigen
P70186	Mus musculus	potential	Epiphycan
P09803	Mus musculus	potential	Epithelial cadherin
Q99JW5	Mus musculus	potential	Epithelial cell adhesion molecule
Q03146	Mus musculus	potential	Epithelial discoidin domain-containing receptor 1
Q9DA01	Mus musculus	potential	Eppin
O70258	Mus musculus	potential	Epsilon-sarcoglycan
Q2HXL6	Mus musculus	potential	ER degradation-enhancing alpha-mannosidase-like 3
Q8R180	Mus musculus	potential	ERO1-like protein alpha
Q8R2E9	Mus musculus	potential	ERO1-like protein beta
Q9JLN5	Mus musculus	potential	Erythroid membrane-associated protein
P07321	Mus musculus	confirmed	Erythropoietin
P14753	Mus musculus	confirmed	Erythropoietin receptor
Q00690	Mus musculus	by similarity	E-selectin
Q91VF4	Mus musculus	potential	ESM-1 protein
Q9EQ06	Mus musculus	potential	Estradiol 17-beta-dehydrogenase 11
Q9Z2B5	Mus musculus	potential	Eukaryotic translation initiation factor 2-alpha kinase 3
Q9QY96	Mus musculus	potential	Extracellular calcium-sensing receptor
Q8C8T7	Mus musculus	potential	Extracellular leucine-rich repeat and fibronectin type-III domain-containing protein 1
Q61508	Mus musculus	confirmed	Extracellular matrix protein 1
Q5FW85	Mus musculus	potential	Extracellular matrix protein 2
Q80T14	Mus musculus	potential	Extracellular matrix protein FRAS1
P62810	Mus musculus	potential	Extracellular peptidase inhibitor
Q8K007	Mus musculus	potential	Extracellular sulfatase Sulf-1
Q8CFG0	Mus musculus	potential	Extracellular sulfatase Sulf-2
O09164	Mus musculus	by similarity	Extracellular superoxide dismutase [Cu-Zn]
Q3USW5	Mus musculus	potential	FAD-dependent oxidoreductase domain-containing protein 2
A1KXC4	Mus musculus	potential	Fas apoptotic inhibitory molecule 3
Q920A9	Mus musculus	by similarity	Fc receptor-like A
Q5DRQ8	Mus musculus	potential	Fc receptor-like B
Q8R4Y0	Mus musculus	potential	Fc receptor-like protein 1
Q68SN8	Mus musculus	potential	Fc receptor-like protein 5
A1YIY0	Mus musculus	potential	Fc receptor-like protein 6
Q9QXC1	Mus musculus	potential	Fetuin-B
Q61565	Mus musculus	potential	FGF receptor-like molecule
Q61554	Mus musculus	potential	Fibrillin-1
Q61555	Mus musculus	potential	Fibrillin-2
Q8K0E8	Mus musculus	by similarity	Fibrinogen beta chain
Q8VCM7	Mus musculus	by similarity	Fibrinogen gamma chain
Q71KU9	Mus musculus	potential	Fibrinogen-like protein 1
O35565	Mus musculus	potential	Fibroblast growth factor 10
O35622	Mus musculus	potential	Fibroblast growth factor 15
P63075	Mus musculus	potential	Fibroblast growth factor 17
O89101	Mus musculus	potential	Fibroblast growth factor 18
Q9JJN1	Mus musculus	potential	Fibroblast growth factor 21
Q9ESS2	Mus musculus	potential	Fibroblast growth factor 22
Q9EPC2	Mus musculus	potential	Fibroblast growth factor 23
P11403	Mus musculus	potential	Fibroblast growth factor 4
P15656	Mus musculus	potential	Fibroblast growth factor 5
P21658	Mus musculus	potential	Fibroblast growth factor 6
P37237	Mus musculus	potential	Fibroblast growth factor 8
Q99052	Mus musculus	potential	Fibroblast growth factor receptor
P21803	Mus musculus	confirmed	Fibroblast growth factor receptor 2
Q61851	Mus musculus	potential	Fibroblast growth factor receptor 3
Q03142	Mus musculus	potential	Fibroblast growth factor receptor 4
Q91V87	Mus musculus	by similarity	Fibroblast growth factor receptor-like 1
O70514	Mus musculus	potential	Fibroblast growth factor-binding protein 1
Q1HCM0	Mus musculus	potential	Fibroblast growth factor-binding protein 3
Q80ZA4	Mus musculus	potential	Fibrocystin-L
P12804	Mus musculus	potential	Fibroleukin
P50608	Mus musculus	by similarity	Fibromodulin
P11276	Mus musculus	by similarity	Fibronectin
Q3TR08	Mus musculus	potential	Fibronectin type III domain-containing protein 4
Q8K4Z2	Mus musculus	potential	Fibronectin type III domain-containing protein 5
A2AED3	Mus musculus	potential	Fibronectin type III domain-containing protein 7
Q8C119	Mus musculus	potential	Fibronectin type-III domain-containing protein C4orf31 homolog
Q08879	Mus musculus	confirmed	Fibulin-1
P37889	Mus musculus	confirmed	Fibulin-2
Q9WVH9	Mus musculus	potential	Fibulin-5
Q501P1	Mus musculus	potential	Fibulin-7
O70165	Mus musculus	confirmed	Ficolin-1
O70497	Mus musculus	potential	Ficolin-2
Q9CQS3	Mus musculus	potential	Fin bud initiation factor homolog
Q61576	Mus musculus	potential	FK506-binding protein 10
Q9D1M7	Mus musculus	potential	FK506-binding protein 11
P59024	Mus musculus	by similarity	FK506-binding protein 14
P45878	Mus musculus	potential	FK506-binding protein 2
O54998	Mus musculus	potential	FK506-binding protein 7
Q9Z247	Mus musculus	potential	FK506-binding protein 9
Q00342	Mus musculus	potential	FL cytokine receptor
Q9WVA8	Mus musculus	potential	FMRFamide-related peptides
Q9ESQ8	Mus musculus	potential	FMRFamide-related peptides
P35846	Mus musculus	potential	Folate receptor alpha
Q05685	Mus musculus	potential	Folate receptor beta
P35378	Mus musculus	potential	Follicle-stimulating hormone receptor
P47931	Mus musculus	potential	Follistatin
Q62356	Mus musculus	by similarity	Follistatin-related protein 1
Q9EQC7	Mus musculus	potential	Follistatin-related protein 3
Q5STE3	Mus musculus	potential	Follistatin-related protein 4
Q8BFR2	Mus musculus	potential	Follistatin-related protein 5
Q60687	Mus musculus	by similarity	Follitropin subunit beta
Q8BQB4	Mus musculus	potential	Four-jointed box protein 1
Q53YU8	Mus musculus	potential	Foveolin
O35188	Mus musculus	potential	Fractalkine
Q684R7	Mus musculus	potential	FRAS1-related extracellular matrix protein 1
Q6NVD0	Mus musculus	potential	FRAS1-related extracellular matrix protein 2
Q5H8B9	Mus musculus	potential	FRAS1-related extracellular matrix protein 3
O70421	Mus musculus	potential	Frizzled-1
Q8BKG4	Mus musculus	potential	Frizzled-10
Q9JIP6	Mus musculus	potential	Frizzled-2
Q61086	Mus musculus	potential	Frizzled-3
Q61088	Mus musculus	potential	Frizzled-4
Q9EQD0	Mus musculus	potential	Frizzled-5
Q61089	Mus musculus	potential	Frizzled-6
Q61090	Mus musculus	potential	Frizzled-7
Q61091	Mus musculus	potential	Frizzled-8
Q9R216	Mus musculus	potential	Frizzled-9
P23188	Mus musculus	potential	Furin
Q61835	Mus musculus	potential	FXYD domain-containing ion transport regulator 3
Q9D2W0	Mus musculus	potential	FXYD domain-containing ion transport regulator 4
P97808	Mus musculus	potential	FXYD domain-containing ion transport regulator 5
Q9D164	Mus musculus	potential	FXYD domain-containing ion transport regulator 6
Q53WT3	Mus musculus	potential	GABA(A) receptor beta-1 subunit
P54818	Mus musculus	by similarity	Galactocerebrosidase
P47212	Mus musculus	potential	Galanin
Q810H5	Mus musculus	by similarity	Galanin-like peptide
Q07797	Mus musculus	potential	Galectin-3-binding protein
P62812	Mus musculus	potential	Gamma-aminobutyric acid receptor subunit alpha-1
P26048	Mus musculus	potential	Gamma-aminobutyric acid receptor subunit alpha-2
P26049	Mus musculus	potential	Gamma-aminobutyric acid receptor subunit alpha-3
Q9D6F4	Mus musculus	potential	Gamma-aminobutyric acid receptor subunit alpha-4
Q8BHJ7	Mus musculus	potential	Gamma-aminobutyric acid receptor subunit alpha-5
P16305	Mus musculus	potential	Gamma-aminobutyric acid receptor subunit alpha-6
P50571	Mus musculus	potential	Gamma-aminobutyric acid receptor subunit beta-1
P63137	Mus musculus	by similarity	Gamma-aminobutyric acid receptor subunit beta-2
P63080	Mus musculus	potential	Gamma-aminobutyric acid receptor subunit beta-3
P22933	Mus musculus	confirmed	Gamma-aminobutyric acid receptor subunit delta
Q9R0Y8	Mus musculus	potential	Gamma-aminobutyric acid receptor subunit gamma-1
P22723	Mus musculus	potential	Gamma-aminobutyric acid receptor subunit gamma-2
P27681	Mus musculus	potential	Gamma-aminobutyric acid receptor subunit gamma-3
Q8QZW7	Mus musculus	potential	Gamma-aminobutyric acid receptor subunit pi
P56475	Mus musculus	potential	Gamma-aminobutyric acid receptor subunit rho-1
P56476	Mus musculus	potential	Gamma-aminobutyric acid receptor subunit rho-2
Q9JLF1	Mus musculus	potential	Gamma-aminobutyric acid receptor subunit theta
Q9WV18	Mus musculus	potential	Gamma-aminobutyric acid type B receptor subunit 1
Q80T41	Mus musculus	potential	Gamma-aminobutyric acid type B receptor subunit 2
Q9Z0L8	Mus musculus	by similarity	Gamma-glutamyl hydrolase
Q60648	Mus musculus	potential	Ganglioside GM2 activator
P48756	Mus musculus	by similarity	Gastric inhibitory polypeptide
Q0P543	Mus musculus	potential	Gastric inhibitory polypeptide receptor
P52787	Mus musculus	potential	Gastric intrinsic factor
Q9CPP7	Mus musculus	potential	Gastric triacylglycerol lipase
Q9D7R7	Mus musculus	potential	Gastricsin
P48757	Mus musculus	potential	Gastrin
Q8R1I2	Mus musculus	by similarity	Gastrin-releasing peptide
Q9CR36	Mus musculus	by similarity	Gastrokine-1
Q9CQS6	Mus musculus	potential	Gastrokine-2
Q8CFX1	Mus musculus	potential	GDH/6PGL endoplasmic bifunctional protein
P97785	Mus musculus	potential	GDNF family receptor alpha-1
O08842	Mus musculus	potential	GDNF family receptor alpha-2
O35118	Mus musculus	potential	GDNF family receptor alpha-3
Q9JJT2	Mus musculus	potential	GDNF family receptor alpha-4
Q6SJE0	Mus musculus	potential	GDNF family receptor alpha-like
Q91ZW2	Mus musculus	potential	GDP-fucose protein O-fucosyltransferase 1
Q8VHI3	Mus musculus	potential	GDP-fucose protein O-fucosyltransferase 2
P13020	Mus musculus	potential	Gelsolin
Q99J23	Mus musculus	potential	GH3 domain-containing protein
Q07235	Mus musculus	by similarity	Glia-derived nexin
P48540	Mus musculus	potential	Glial cell line-derived neurotrophic factor
Q9CWG1	Mus musculus	potential	Glioma pathogenesis-related protein 1
Q9JLU0	Mus musculus	potential	Glomerular epithelial protein 1
P55095	Mus musculus	by similarity	Glucagon
Q61606	Mus musculus	potential	Glucagon receptor
O35659	Mus musculus	potential	Glucagon-like peptide 1 receptor
Q5IXF8	Mus musculus	potential	Glucagon-like peptide 2 receptor
Q3UHD2	Mus musculus	potential	Glucose-fructose oxidoreductase domain-containing protein 1
Q9CYH5	Mus musculus	potential	Glucose-fructose oxidoreductase domain-containing protein 2
O08795	Mus musculus	confirmed	Glucosidase 2 subunit beta
P17439	Mus musculus	by similarity	Glucosylceramidase
Q91ZU9	Mus musculus	potential	Glutamate [NMDA] receptor subunit 3B
P35436	Mus musculus	potential	Glutamate [NMDA] receptor subunit epsilon-1
Q01097	Mus musculus	potential	Glutamate [NMDA] receptor subunit epsilon-2
Q01098	Mus musculus	potential	Glutamate [NMDA] receptor subunit epsilon-3
Q03391	Mus musculus	potential	Glutamate [NMDA] receptor subunit epsilon-4
P35438	Mus musculus	potential	Glutamate [NMDA] receptor subunit zeta-1
P23818	Mus musculus	potential	Glutamate receptor 1
P23819	Mus musculus	potential	Glutamate receptor 2
Q9Z2W9	Mus musculus	potential	Glutamate receptor 3
Q9Z2W8	Mus musculus	potential	Glutamate receptor 4
Q61627	Mus musculus	potential	Glutamate receptor delta-1 subunit
Q61625	Mus musculus	potential	Glutamate receptor delta-2 subunit
Q60934	Mus musculus	potential	Glutamate receptor, ionotropic kainate 1
P39087	Mus musculus	potential	Glutamate receptor, ionotropic kainate 2
Q8BMF5	Mus musculus	potential	Glutamate receptor, ionotropic kainate 4
Q61626	Mus musculus	potential	Glutamate receptor, ionotropic kainate 5
Q9CYK2	Mus musculus	potential	Glutaminyl-peptide cyclotransferase
P46412	Mus musculus	potential	Glutathione peroxidase 3
Q91WR8	Mus musculus	potential	Glutathione peroxidase 6
Q99LJ6	Mus musculus	potential	Glutathione peroxidase 7
Q64018	Mus musculus	by similarity	Glycine receptor subunit alpha-1
Q7TNC8	Mus musculus	potential	Glycine receptor subunit alpha-2
Q91XP5	Mus musculus	potential	Glycine receptor subunit alpha-3
Q61603	Mus musculus	potential	Glycine receptor subunit alpha-4
P48168	Mus musculus	by similarity	Glycine receptor subunit beta
Q9D2R4	Mus musculus	by similarity	Glycoprotein 25L
Q925Q5	Mus musculus	potential	Glycoprotein hormone alpha-2
Q812B2	Mus musculus	potential	Glycoprotein hormone beta-5
P01216	Mus musculus	confirmed	Glycoprotein hormones alpha chain
Q02596	Mus musculus	confirmed	Glycosylation-dependent cell adhesion molecule 1
Q9D1N2	Mus musculus	potential	Glycosylphosphatidylinositol-anchored high density lipoprotein-binding protein 1
A4FUP9	Mus musculus	potential	Glycosyltransferase 1 domain-containing protein 1
Q8K297	Mus musculus	potential	Glycosyltransferase 25 family member 1
Q6NVG7	Mus musculus	potential	Glycosyltransferase 25 family member 2
A3KGW5	Mus musculus	potential	Glycosyltransferase 25 family member 3
Q9D4R2	Mus musculus	potential	Glycosyltransferase 54 domain-containing protein
Q9QZF2	Mus musculus	by similarity	Glypican-1
Q8BKV1	Mus musculus	potential	Glypican-2
Q8CFZ4	Mus musculus	potential	Glypican-3
P51655	Mus musculus	potential	Glypican-4
Q8CAL5	Mus musculus	potential	Glypican-5
Q9R087	Mus musculus	potential	Glypican-6
Q61543	Mus musculus	potential	Golgi apparatus protein 1
Q8VEM1	Mus musculus	potential	Goliath homolog
Q8BXQ2	Mus musculus	potential	GPI transamidase component PIG-T
Q9CXY9	Mus musculus	by similarity	GPI-anchor transamidase
Q60935	Mus musculus	potential	GPI-linked NAD(P)(+)--arginine ADP-ribosyltransferase 1
Q8VEC3	Mus musculus	potential	G-protein coupled receptor 110
Q8K209	Mus musculus	potential	G-protein coupled receptor 56
Q8CJ12	Mus musculus	potential	G-protein coupled receptor 64
Q8VHN7	Mus musculus	potential	G-protein coupled receptor 98
Q923Z0	Mus musculus	potential	G-protein coupled receptor family C group 5 member B
Q8K3J9	Mus musculus	potential	G-protein coupled receptor family C group 5 member C
Q8K4Z6	Mus musculus	potential	G-protein coupled receptor family C group 6 member A
P28798	Mus musculus	confirmed	Granulins
P09920	Mus musculus	confirmed	Granulocyte colony-stimulating factor
P40223	Mus musculus	potential	Granulocyte colony-stimulating factor receptor
P01587	Mus musculus	confirmed	Granulocyte-macrophage colony-stimulating factor
Q00941	Mus musculus	potential	Granulocyte-macrophage colony-stimulating factor receptor subunit alpha
Q61623	Mus musculus	potential	Granuloma associated factor
P11032	Mus musculus	confirmed	Granzyme A
P04187	Mus musculus	confirmed	Granzyme B(G,H)
P08882	Mus musculus	confirmed	Granzyme C
P11033	Mus musculus	confirmed	Granzyme D
P08884	Mus musculus	confirmed	Granzyme E
P08883	Mus musculus	confirmed	Granzyme F
P13366	Mus musculus	confirmed	Granzyme G
O35205	Mus musculus	potential	Granzyme K
O08643	Mus musculus	potential	Granzyme Met-ase-1 precurser
O70326	Mus musculus	by similarity	Gremlin-1
O88273	Mus musculus	potential	Gremlin-2
Q9QXX3	Mus musculus	confirmed	Group 10 secretory phospholipase A2
P48076	Mus musculus	potential	Group IIC secretory phospholipase A2
Q9WVF6	Mus musculus	potential	Group IID secretory phospholipase A2
Q9QUL3	Mus musculus	potential	Group IIE secretory phospholipase A2
Q9QZT4	Mus musculus	potential	Group IIF secretory phospholipase A2
Q9EPR2	Mus musculus	potential	Group XIIA secretory phospholipase A2
Q99P27	Mus musculus	potential	Group XIIB secretory phospholipase A2-like protein
Q01721	Mus musculus	potential	Growth arrest-specific protein 1
Q61592	Mus musculus	potential	Growth arrest-specific protein 6
P16882	Mus musculus	confirmed	Growth hormone receptor
P32082	Mus musculus	potential	Growth hormone-releasing hormone receptor
Q9Z1W4	Mus musculus	potential	Growth/differentiation factor 11
Q9Z0J7	Mus musculus	potential	Growth/differentiation factor 15
Q9WV56	Mus musculus	potential	Growth/differentiation factor 2
Q07104	Mus musculus	potential	Growth/differentiation factor 3
P43027	Mus musculus	potential	Growth/differentiation factor 5
P43028	Mus musculus	potential	Growth/differentiation factor 6
P43029	Mus musculus	potential	Growth/differentiation factor 7
O08689	Mus musculus	potential	Growth/differentiation factor 8
Q07105	Mus musculus	potential	Growth/differentiation factor 9
P12850	Mus musculus	probable	Growth-regulated alpha protein
Q6TL19	Mus musculus	potential	Guanylate cyclase 2G
O09051	Mus musculus	potential	Guanylate cyclase activator 2B
P33680	Mus musculus	potential	Guanylin
P52785	Mus musculus	potential	Guanylyl cyclase GC-E
P06339	Mus musculus	potential	H-2 class I histocompatibility antigen, D-37 alpha chain
P01899	Mus musculus	confirmed	H-2 class I histocompatibility antigen, D-B alpha chain
P01900	Mus musculus	confirmed	H-2 class I histocompatibility antigen, D-D alpha chain
P14426	Mus musculus	by similarity	H-2 class I histocompatibility antigen, D-K alpha chain
P14427	Mus musculus	by similarity	H-2 class I histocompatibility antigen, D-P alpha chain
P01901	Mus musculus	confirmed	H-2 class I histocompatibility antigen, K-B alpha chain
P01902	Mus musculus	confirmed	H-2 class I histocompatibility antigen, K-D alpha chain
P04223	Mus musculus	confirmed	H-2 class I histocompatibility antigen, K-K alpha chain
P03991	Mus musculus	by similarity	H-2 class I histocompatibility antigen, K-W28 alpha chain
P01897	Mus musculus	confirmed	H-2 class I histocompatibility antigen, L-D alpha chain
P01898	Mus musculus	potential	H-2 class I histocompatibility antigen, Q10 alpha chain
P14429	Mus musculus	by similarity	H-2 class I histocompatibility antigen, Q7 alpha chain
P14430	Mus musculus	confirmed	H-2 class I histocompatibility antigen, Q8 alpha chain
P14431	Mus musculus	confirmed	H-2 class I histocompatibility antigen, Q9 alpha chain
P14432	Mus musculus	potential	H-2 class I histocompatibility antigen, TLA(B) alpha chain
P14433	Mus musculus	potential	H-2 class I histocompatibility antigen, TLA(C) alpha chain
P14483	Mus musculus	confirmed	H-2 class II histocompatibility antigen, A beta chain
P14434	Mus musculus	potential	H-2 class II histocompatibility antigen, A-B alpha chain
P04228	Mus musculus	confirmed	H-2 class II histocompatibility antigen, A-D alpha chain
P01921	Mus musculus	confirmed	H-2 class II histocompatibility antigen, A-D beta chain
P06346	Mus musculus	by similarity	H-2 class II histocompatibility antigen, A-F beta chain
P01910	Mus musculus	by similarity	H-2 class II histocompatibility antigen, A-K alpha chain
P06343	Mus musculus	confirmed	H-2 class II histocompatibility antigen, A-K beta chain
P06342	Mus musculus	confirmed	H-2 class II histocompatibility antigen, A-Q beta chain
P06345	Mus musculus	confirmed	H-2 class II histocompatibility antigen, A-S beta chain
P06344	Mus musculus	confirmed	H-2 class II histocompatibility antigen, A-U beta chain
P04230	Mus musculus	confirmed	H-2 class II histocompatibility antigen, E-B beta chain
P01904	Mus musculus	confirmed	H-2 class II histocompatibility antigen, E-D alpha chain
P01915	Mus musculus	confirmed	H-2 class II histocompatibility antigen, E-D beta chain
P04224	Mus musculus	confirmed	H-2 class II histocompatibility antigen, E-K alpha chain
P20040	Mus musculus	confirmed	H-2 class II histocompatibility antigen, E-Q beta chain
P18468	Mus musculus	confirmed	H-2 class II histocompatibility antigen, I-A beta chain
P23150	Mus musculus	confirmed	H-2 class II histocompatibility antigen, I-E alpha chain
P18469	Mus musculus	confirmed	H-2 class II histocompatibility antigen, I-E beta chain
Q5R3X0	Mus musculus	potential	H26-1 variable region
Q61640	Mus musculus	potential	H-2D4(Q) protein
Q31124	Mus musculus	potential	H2-IE-beta chain
Q31239	Mus musculus	potential	H2-IE-beta precursor
Q31634	Mus musculus	potential	H2-K protein
Q31148	Mus musculus	potential	H2-K protein
Q31614	Mus musculus	potential	H2-K protein
Q61642	Mus musculus	potential	H-2K-sm1
Q61646	Mus musculus	potential	Haptoglobin
Q8BM72	Mus musculus	potential	Heat shock 70 kDa protein 13
Q3UWA6	Mus musculus	potential	Heat-stable enterotoxin receptor
Q7TN16	Mus musculus	potential	Hedgehog-interacting protein
Q9QUJ0	Mus musculus	potential	Hematopoietic cell signal transducer
Q64314	Mus musculus	potential	Hematopoietic progenitor cell antigen CD34
Q7TQ32	Mus musculus	potential	Hemojuvelin
Q91X72	Mus musculus	potential	Hemopexin
Q4VAH7	Mus musculus	potential	HEPACAM family member 2
O35310	Mus musculus	confirmed	Heparan sulfate glucosamine 3-O-sulfotransferase 1
Q6YGZ1	Mus musculus	by similarity	Heparanase
P49182	Mus musculus	confirmed	Heparin cofactor 2
P27656	Mus musculus	by similarity	Hepatic triacylglycerol lipase
Q5QNS5	Mus musculus	potential	Hepatitis A virus cellular receptor 1 homolog
Q8VIM0	Mus musculus	potential	Hepatitis A virus cellular receptor 2 homolog
Q8R1L8	Mus musculus	potential	Hepatocellular carcinoma-associated protein TD26 homolog
Q640R3	Mus musculus	potential	Hepatocyte cell adhesion molecule
Q08048	Mus musculus	by similarity	Hepatocyte growth factor
Q9R098	Mus musculus	by similarity	Hepatocyte growth factor activator
P16056	Mus musculus	potential	Hepatocyte growth factor receptor
P26928	Mus musculus	potential	Hepatocyte growth factor-like protein
Q9EQ21	Mus musculus	potential	Hepcidin
Q80T19	Mus musculus	potential	Hepcidin-2
Q9Z0Z4	Mus musculus	potential	Hephaestin
Q3V1H3	Mus musculus	potential	Hephaestin-like protein 1
P70387	Mus musculus	potential	Hereditary hemochromatosis protein homolog
Q14DK5	Mus musculus	potential	HHIP-like protein 1
Q9D2G9	Mus musculus	potential	HHIP-like protein 2
Q2TB54	Mus musculus	potential	High affinity immunoglobulin alpha and immunoglobulin mu Fc receptor
P20489	Mus musculus	confirmed	High affinity immunoglobulin epsilon receptor subunit alpha
P20491	Mus musculus	potential	High affinity immunoglobulin epsilon receptor subunit gamma
P26151	Mus musculus	potential	High affinity immunoglobulin gamma Fc receptor I
Q3UFB7	Mus musculus	potential	High affinity nerve growth factor receptor
Q9D0S9	Mus musculus	potential	Histidine triad nucleotide-binding protein 2
Q9ESM3	Mus musculus	potential	Hyaluronan and proteoglycan link protein 2
Q80WM5	Mus musculus	potential	Hyaluronan and proteoglycan link protein 3
Q80WM4	Mus musculus	potential	Hyaluronan and proteoglycan link protein 4
Q8K0D2	Mus musculus	confirmed	Hyaluronan-binding protein 2
P48794	Mus musculus	by similarity	Hyaluronidase PH-20
Q91ZJ9	Mus musculus	potential	Hyaluronidase-1
O35632	Mus musculus	potential	Hyaluronidase-2
Q8VEI3	Mus musculus	potential	Hyaluronidase-3
Q9R092	Mus musculus	potential	Hydroxysteroid 17-beta dehydrogenase 6
Q9JKR6	Mus musculus	by similarity	Hypoxia up-regulated protein 1
Q9JHJ8	Mus musculus	by similarity	ICOS ligand
Q08890	Mus musculus	potential	Iduronate 2-sulfatase
Q61857	Mus musculus	potential	I-E(B-beta) protein
P01750	Mus musculus	confirmed	Ig heavy chain V region 102
P01758	Mus musculus	confirmed	Ig heavy chain V region 108A
P01754	Mus musculus	confirmed	Ig heavy chain V region 145
P01753	Mus musculus	confirmed	Ig heavy chain V region 186-1
P18532	Mus musculus	confirmed	Ig heavy chain V region 1B43
P01748	Mus musculus	confirmed	Ig heavy chain V region 23
P01749	Mus musculus	confirmed	Ig heavy chain V region 3
P18526	Mus musculus	confirmed	Ig heavy chain V region 345
P01806	Mus musculus	confirmed	Ig heavy chain V region 441
P18529	Mus musculus	confirmed	Ig heavy chain V region 5-76
P18525	Mus musculus	confirmed	Ig heavy chain V region 5-84
P18533	Mus musculus	confirmed	Ig heavy chain V region 733
P18530	Mus musculus	confirmed	Ig heavy chain V region 7-39
P01746	Mus musculus	confirmed	Ig heavy chain V region 93G7
P01751	Mus musculus	confirmed	Ig heavy chain V region B1-8/186-2
P01759	Mus musculus	confirmed	Ig heavy chain V region BCL1
P01795	Mus musculus	confirmed	Ig heavy chain V region M167
P18531	Mus musculus	confirmed	Ig heavy chain V region M315
P01821	Mus musculus	confirmed	Ig heavy chain V region MC101
P01819	Mus musculus	confirmed	Ig heavy chain V region MOPC 141
P01783	Mus musculus	confirmed	Ig heavy chain V region MOPC 21
P01822	Mus musculus	confirmed	Ig heavy chain V region MOPC 315
P01820	Mus musculus	confirmed	Ig heavy chain V region PJ14
P18524	Mus musculus	confirmed	Ig heavy chain V region RF
P01755	Mus musculus	confirmed	Ig heavy chain V region S43
P03980	Mus musculus	confirmed	Ig heavy chain V region TEPC 1017
P06327	Mus musculus	confirmed	Ig heavy chain V region VH558 A1/A4
P06328	Mus musculus	confirmed	Ig heavy chain V region VH558 B4
P01627	Mus musculus	confirmed	Ig kappa chain V-II region VKappa167
P01658	Mus musculus	confirmed	Ig kappa chain V-III region MOPC 321
P01661	Mus musculus	confirmed	Ig kappa chain V-III region MOPC 63
P01680	Mus musculus	confirmed	Ig kappa chain V-IV region S107B
P01635	Mus musculus	confirmed	Ig kappa chain V-V region K2
P01638	Mus musculus	confirmed	Ig kappa chain V-V region L6
P01642	Mus musculus	confirmed	Ig kappa chain V-V region L7
P01641	Mus musculus	confirmed	Ig kappa chain V-V region MOPC 173B
P01634	Mus musculus	confirmed	Ig kappa chain V-V region MOPC 21
P01639	Mus musculus	confirmed	Ig kappa chain V-V region MOPC 41
P01633	Mus musculus	confirmed	Ig kappa chain V-V region MPC11
P01637	Mus musculus	confirmed	Ig kappa chain V-V region T1
P01723	Mus musculus	confirmed	Ig lambda-1 chain V region
P01726	Mus musculus	confirmed	Ig lambda-1 chain V region H2020
P01727	Mus musculus	confirmed	Ig lambda-1 chain V region S43
P01724	Mus musculus	confirmed	Ig lambda-1 chain V regions MOPC 104E/RPC20/J558/S104
P01728	Mus musculus	confirmed	Ig lambda-2 chain V region
P01729	Mus musculus	confirmed	Ig lambda-2 chain V region MOPC 315
Q61559	Mus musculus	by similarity	IgG receptor FcRn large subunit p51
Q8HW98	Mus musculus	potential	Ig-like domain-containing protein ENSP00000270642 homolog
Q9D3R5	Mus musculus	potential	Ig-like V-type domain-containing protein ENSP00000329499 homolog
Q8R035	Mus musculus	potential	Immature colon carcinoma transcript 1 protein
P13372	Mus musculus	potential	Immunoglobulin iota chain
P01592	Mus musculus	confirmed	Immunoglobulin J chain
P20764	Mus musculus	potential	Immunoglobulin lambda-like polypeptide 1
P13373	Mus musculus	potential	Immunoglobulin omega chain
Q6GU68	Mus musculus	potential	Immunoglobulin superfamily containing leucine-rich repeat protein
Q5RKR3	Mus musculus	potential	Immunoglobulin superfamily containing leucine-rich repeat protein 2
Q7TQA1	Mus musculus	potential	Immunoglobulin superfamily member 1
Q3V1M1	Mus musculus	potential	Immunoglobulin superfamily member 10
P0C673	Mus musculus	potential	Immunoglobulin superfamily member 11
Q7TNR6	Mus musculus	potential	Immunoglobulin superfamily member 21
Q6ZQA6	Mus musculus	potential	Immunoglobulin superfamily member 3
Q7TSN7	Mus musculus	potential	Immunoglobulin superfamily member 5
P0C6B7	Mus musculus	potential	Immunoglobulin superfamily member 6
Q8R366	Mus musculus	potential	Immunoglobulin superfamily member 8
Q8CBR1	Mus musculus	potential	Immunoglobulin-like domain-containing receptor 1
Q811C3	Mus musculus	potential	Imunoglobulin gamma-3 kappa chain
Q8C0F9	Mus musculus	potential	Inactive serine protease 35
Q8BU25	Mus musculus	potential	Inactive serine protease RAMP
O70169	Mus musculus	potential	Inactive testicular serine protease 1
Q8K4I7	Mus musculus	potential	Inactive testis serine protease 5
P97812	Mus musculus	potential	Indian hedgehog protein
Q9WVS0	Mus musculus	potential	Inducible T-cell costimulator
Q04997	Mus musculus	by similarity	Inhibin alpha chain
Q04998	Mus musculus	by similarity	Inhibin beta A chain
Q04999	Mus musculus	potential	Inhibin beta B chain
P55104	Mus musculus	potential	Inhibin beta C chain
O08717	Mus musculus	potential	Inhibin beta E chain
Q3TNL8	Mus musculus	potential	Inositol 1,4,5-triphosphate receptor-interacting protein
A2ASA8	Mus musculus	potential	Inositol 1,4,5-triphosphate receptor-interacting protein-like 1
Q3UV16	Mus musculus	potential	Inositol 1,4,5-triphosphate receptor-interacting protein-like 2
Q6B9Z0	Mus musculus	potential	Insulin growth factor-like family member
P15208	Mus musculus	confirmed	Insulin receptor
Q9WTL4	Mus musculus	potential	Insulin receptor-related protein
P01325	Mus musculus	confirmed	Insulin-1
P01326	Mus musculus	confirmed	Insulin-2
O09107	Mus musculus	potential	Insulin-like 3
Q60751	Mus musculus	potential	Insulin-like growth factor 1 receptor
P09535	Mus musculus	confirmed	Insulin-like growth factor II
P47876	Mus musculus	by similarity	Insulin-like growth factor-binding protein 1
P47877	Mus musculus	by similarity	Insulin-like growth factor-binding protein 2
P47878	Mus musculus	by similarity	Insulin-like growth factor-binding protein 3
P47879	Mus musculus	by similarity	Insulin-like growth factor-binding protein 4
Q07079	Mus musculus	potential	Insulin-like growth factor-binding protein 5
P47880	Mus musculus	by similarity	Insulin-like growth factor-binding protein 6
Q61581	Mus musculus	potential	Insulin-like growth factor-binding protein 7
P70389	Mus musculus	by similarity	Insulin-like growth factor-binding protein complex acid labile chain
Q80W15	Mus musculus	potential	Insulin-like growth factor-binding protein-like 1
Q9WUG6	Mus musculus	potential	Insulin-like peptide INSL5
Q9QY05	Mus musculus	potential	Insulin-like peptide INSL6
P05524	Mus musculus	potential	INT-2 proto-oncogene protein
Q31188	Mus musculus	potential	Integral membrane protein
P98154	Mus musculus	potential	Integral membrane protein DGCR2/IDD
Q6DID7	Mus musculus	potential	Integral membrane protein GPR177
Q8BPS4	Mus musculus	potential	Integral membrane protein GPR180
Q3V3R4	Mus musculus	by similarity	Integrin alpha-1
P61622	Mus musculus	potential	Integrin alpha-11
Q62469	Mus musculus	by similarity	Integrin alpha-2
Q62470	Mus musculus	by similarity	Integrin alpha-3
Q00651	Mus musculus	potential	Integrin alpha-4
P11688	Mus musculus	by similarity	Integrin alpha-5
Q61739	Mus musculus	by similarity	Integrin alpha-6
Q61738	Mus musculus	confirmed	Integrin alpha-7
A2ARA8	Mus musculus	potential	Integrin alpha-8
Q3V0T4	Mus musculus	potential	Integrin alpha-D
Q60677	Mus musculus	by similarity	Integrin alpha-E
Q9QUM0	Mus musculus	by similarity	Integrin alpha-IIb
P24063	Mus musculus	confirmed	Integrin alpha-L
P05555	Mus musculus	confirmed	Integrin alpha-M
P43406	Mus musculus	by similarity	Integrin alpha-V
Q9QXH4	Mus musculus	potential	Integrin alpha-X
P09055	Mus musculus	confirmed	Integrin beta-1
P11835	Mus musculus	confirmed	Integrin beta-2
Q3UV74	Mus musculus	potential	Integrin beta-2-like protein
O54890	Mus musculus	potential	Integrin beta-3
O70309	Mus musculus	potential	Integrin beta-5
Q9Z0T9	Mus musculus	potential	Integrin beta-6
P26011	Mus musculus	confirmed	Integrin beta-7
Q8VDV0	Mus musculus	potential	Integrin beta-like protein 1
O88310	Mus musculus	by similarity	Intelectin-1a
Q80ZA0	Mus musculus	potential	Intelectin-1b
Q61702	Mus musculus	potential	Inter-alpha-trypsin inhibitor heavy chain H1
Q61703	Mus musculus	potential	Inter-alpha-trypsin inhibitor heavy chain H2
Q61704	Mus musculus	potential	Inter-alpha-trypsin inhibitor heavy chain H3
Q8BJD1	Mus musculus	potential	Inter-alpha-trypsin inhibitor heavy chain H5
P13597	Mus musculus	by similarity	Intercellular adhesion molecule 1
P35330	Mus musculus	potential	Intercellular adhesion molecule 2
Q9ERM2	Mus musculus	potential	Intercellular adhesion molecule 4
Q60625	Mus musculus	potential	Intercellular adhesion molecule 5
Q810G4	Mus musculus	potential	Interferon alpha 11
Q810G3	Mus musculus	potential	Interferon alpha 14
Q6XL62	Mus musculus	potential	Interferon alpha 15
Q540C2	Mus musculus	potential	Interferon alpha 4
Q810G2	Mus musculus	potential	Interferon alpha 5
Q810G1	Mus musculus	potential	Interferon alpha 6T
Q810G6	Mus musculus	potential	Interferon alpha 7
Q810G5	Mus musculus	potential	Interferon alpha 8/6
O35664	Mus musculus	potential	Interferon alpha/beta receptor 2
P01572	Mus musculus	by similarity	Interferon alpha-1
P01572	Mus musculus	potential	Interferon alpha-1
Q61716	Mus musculus	potential	Interferon alpha-11
Q80SS5	Mus musculus	potential	Interferon alpha-12
Q80SU4	Mus musculus	potential	Interferon alpha-13
P01573	Mus musculus	by similarity	Interferon alpha-2
P07351	Mus musculus	by similarity	Interferon alpha-4
P07349	Mus musculus	by similarity	Interferon alpha-5
P07350	Mus musculus	by similarity	Interferon alpha-6
P06799	Mus musculus	confirmed	Interferon alpha-7
P09235	Mus musculus	by similarity	Interferon alpha-9
Q61719	Mus musculus	potential	Interferon alpha-B
P01575	Mus musculus	confirmed	Interferon beta
Q80ZF2	Mus musculus	potential	Interferon epsilon-1
P01580	Mus musculus	potential	Interferon gamma
Q7TSL0	Mus musculus	potential	Interferon kappa
P33896	Mus musculus	potential	Interferon-alpha/beta receptor alpha chain
O35664	Mus musculus	potential	Interferon-alpha/beta receptor beta chain
P15261	Mus musculus	confirmed	Interferon-gamma receptor alpha chain
Q8VHM7	Mus musculus	potential	Interleukin 10 receptor 2
Q8VHM8	Mus musculus	potential	Interleukin 10 receptor 2
Q8K599	Mus musculus	potential	Interleukin 27A
Q8CGV5	Mus musculus	potential	Interleukin 27A
Q61730	Mus musculus	potential	Interleukin-1 receptor accessory protein
P25085	Mus musculus	by similarity	Interleukin-1 receptor antagonist protein
P13504	Mus musculus	confirmed	Interleukin-1 receptor type I
P27931	Mus musculus	potential	Interleukin-1 receptor type II
P14719	Mus musculus	potential	Interleukin-1 receptor-like 1
Q9ERS7	Mus musculus	potential	Interleukin-1 receptor-like 2
P18893	Mus musculus	potential	Interleukin-10
Q61727	Mus musculus	potential	Interleukin-10 receptor alpha chain
Q61190	Mus musculus	potential	Interleukin-10 receptor beta chain
P47873	Mus musculus	potential	Interleukin-11
Q64385	Mus musculus	confirmed	Interleukin-11 receptor alpha-1 chain
P70225	Mus musculus	by similarity	Interleukin-11 receptor alpha-2 chain
Q60837	Mus musculus	potential	Interleukin-12 receptor beta-1 chain
P97378	Mus musculus	potential	Interleukin-12 receptor beta-2 chain
P43431	Mus musculus	by similarity	Interleukin-12 subunit alpha
P43432	Mus musculus	by similarity	Interleukin-12 subunit beta
P20109	Mus musculus	by similarity	Interleukin-13
O09030	Mus musculus	potential	Interleukin-13 receptor alpha-1 chain
P48346	Mus musculus	potential	Interleukin-15
Q1AHQ7	Mus musculus	potential	Interleukin-15
Q1AHQ6	Mus musculus	potential	Interleukin-15
Q60819	Mus musculus	potential	Interleukin-15 receptor subunit alpha
Q60943	Mus musculus	potential	Interleukin-17 receptor A
Q9JIP3	Mus musculus	by similarity	Interleukin-17 receptor B
Q8K4C2	Mus musculus	by similarity	Interleukin-17 receptor C
Q8JZL1	Mus musculus	potential	Interleukin-17 receptor D
Q8BH06	Mus musculus	potential	Interleukin-17 receptor E
Q62386	Mus musculus	potential	Interleukin-17A
Q9QXT6	Mus musculus	potential	Interleukin-17B
Q61098	Mus musculus	potential	Interleukin-18 receptor 1
Q9Z2B1	Mus musculus	potential	Interleukin-18 receptor accessory protein
Q9Z0M9	Mus musculus	confirmed	Interleukin-18-binding protein
Q8CJ70	Mus musculus	potential	Interleukin-19
P04351	Mus musculus	confirmed	Interleukin-2
P01590	Mus musculus	by similarity	Interleukin-2 receptor alpha chain
P16297	Mus musculus	confirmed	Interleukin-2 receptor subunit beta
Q9JKV9	Mus musculus	potential	Interleukin-20
Q6PHB0	Mus musculus	potential	Interleukin-20 receptor alpha chain
Q9ES17	Mus musculus	potential	Interleukin-21
Q9JHX3	Mus musculus	potential	Interleukin-21 receptor
Q9JJY9	Mus musculus	potential	Interleukin-22
Q80XZ4	Mus musculus	potential	Interleukin-22 receptor subunit alpha-1
Q80XF5	Mus musculus	by similarity	Interleukin-22 receptor subunit alpha-2
Q9JJY8	Mus musculus	potential	Interleukin-22b
Q8K4B4	Mus musculus	potential	Interleukin-23 receptor
Q9EQ14	Mus musculus	potential	Interleukin-23 subunit alpha
Q925S4	Mus musculus	potential	Interleukin-24
O70394	Mus musculus	potential	Interleukin-27 receptor subunit alpha
Q8K3I6	Mus musculus	potential	Interleukin-27 subunit alpha
O35228	Mus musculus	potential	Interleukin-27 subunit beta
Q8CGK5	Mus musculus	potential	Interleukin-28 receptor alpha chain
Q4VK74	Mus musculus	potential	Interleukin-28A
Q8CGK6	Mus musculus	potential	Interleukin-28B
P01586	Mus musculus	confirmed	Interleukin-3
P26952	Mus musculus	potential	Interleukin-3 receptor class 2 alpha chain
P26954	Mus musculus	potential	Interleukin-3 receptor class 2 beta chain
Q6EAL8	Mus musculus	potential	Interleukin-31
Q8K5B1	Mus musculus	by similarity	Interleukin-31 receptor A
Q8R1R4	Mus musculus	potential	Interleukin-34
P07750	Mus musculus	confirmed	Interleukin-4
P16382	Mus musculus	confirmed	Interleukin-4 receptor alpha chain
P04401	Mus musculus	confirmed	Interleukin-5
P21183	Mus musculus	confirmed	Interleukin-5 receptor subunit alpha
P08505	Mus musculus	confirmed	Interleukin-6
P22272	Mus musculus	confirmed	Interleukin-6 receptor subunit alpha
Q00560	Mus musculus	potential	Interleukin-6 receptor subunit beta
P10168	Mus musculus	confirmed	Interleukin-7
P16872	Mus musculus	confirmed	Interleukin-7 receptor subunit alpha
P15247	Mus musculus	confirmed	Interleukin-9
Q01114	Mus musculus	potential	Interleukin-9 receptor
Q8R1W8	Mus musculus	potential	Interphotoreceptor matrix proteoglycan 1
Q80XH2	Mus musculus	potential	Interphotoreceptor matrix proteoglycan 2
Q9EPL5	Mus musculus	potential	Interstitial collagenase A
Q9EPL6	Mus musculus	potential	Interstitial collagenase B
P24822	Mus musculus	potential	Intestinal alkaline phosphatase
Q9DCX8	Mus musculus	potential	Iodotyrosine dehalogenase 1
Q8BX37	Mus musculus	potential	Iron/zinc purple acid phosphatase-like protein
P12968	Mus musculus	potential	Islet amyloid polypeptide
A2ATD1	Mus musculus	potential	Isthmin
Q9D9J7	Mus musculus	potential	Izumo sperm-egg fusion protein 1
O88792	Mus musculus	potential	Junctional adhesion molecule A
Q9JI59	Mus musculus	confirmed	Junctional adhesion molecule B
Q9D8B7	Mus musculus	potential	Junctional adhesion molecule C
Q80UL9	Mus musculus	potential	Junctional adhesion molecule-like
P00755	Mus musculus	probable	Kallikrein 1-related peptidase b1
P15946	Mus musculus	probable	Kallikrein 1-related peptidase b11
P04071	Mus musculus	probable	Kallikrein 1-related peptidase b16
Q61759	Mus musculus	potential	Kallikrein 1-related peptidase b21
P15948	Mus musculus	confirmed	Kallikrein 1-related peptidase b22
Q61754	Mus musculus	potential	Kallikrein 1-related peptidase b24
P36369	Mus musculus	probable	Kallikrein 1-related peptidase b26
Q9JM71	Mus musculus	potential	Kallikrein 1-related peptidase b27
P00756	Mus musculus	probable	Kallikrein 1-related peptidase b3
P15945	Mus musculus	probable	Kallikrein 1-related peptidase b5
P07628	Mus musculus	probable	Kallikrein 1-related peptidase b8
P15949	Mus musculus	probable	Kallikrein 1-related peptidase b9
P00757	Mus musculus	confirmed	Kallikrein 1-related peptidase-like b4
P15947	Mus musculus	probable	Kallikrein-1
Q9QYN3	Mus musculus	potential	Kallikrein-11
Q91VE3	Mus musculus	potential	Kallikrein-7
Q61955	Mus musculus	potential	Kallikrein-8
P06796	Mus musculus	by similarity	Kappa-casein
Q8BJ66	Mus musculus	potential	Kazal-type serine protease inhibitor domain-containing protein 1
Q9JHP7	Mus musculus	potential	KDEL motif-containing protein 1
A2APT9	Mus musculus	potential	Kelch domain-containing protein 7A
Q8CE33	Mus musculus	potential	Kelch-like protein 11
Q3V2T4	Mus musculus	potential	Keratinocyte differentiation-associated protein
P36363	Mus musculus	by similarity	Keratinocyte growth factor
Q8K201	Mus musculus	potential	Keratinocytes-associated transmembrane protein 2
O35367	Mus musculus	potential	Keratocan
P61110	Mus musculus	potential	Kidney androgen-regulated protein
P83555	Mus musculus	by similarity	Killer cell immunoglobulin-like receptor 3DL1
Q80W68	Mus musculus	potential	Kin of IRRE-like protein 1
Q7TSU7	Mus musculus	potential	Kin of IRRE-like protein 2
Q8BR86	Mus musculus	potential	Kin of IRRE-like protein 3
O08677	Mus musculus	potential	Kininogen-1
P20826	Mus musculus	confirmed	Kit ligand
O35082	Mus musculus	potential	Klotho
Q99N43	Mus musculus	potential	Kremen protein 1
Q8K1S7	Mus musculus	potential	Kremen protein 2
Q8BYB9	Mus musculus	potential	KTEL motif-containing protein 1
Q9R097	Mus musculus	potential	Kunitz-type protease inhibitor 1
Q9WU03	Mus musculus	potential	Kunitz-type protease inhibitor 2
Q9D263	Mus musculus	potential	Kunitz-type protease inhibitor 4
P21956	Mus musculus	confirmed	Lactadherin
Q8K1F9	Mus musculus	potential	Lactase-like protein
P08071	Mus musculus	by similarity	Lactotransferrin
P19137	Mus musculus	confirmed	Laminin subunit alpha-1
Q60675	Mus musculus	confirmed	Laminin subunit alpha-2
Q61789	Mus musculus	confirmed	Laminin subunit alpha-3
P97927	Mus musculus	potential	Laminin subunit alpha-4
Q61001	Mus musculus	confirmed	Laminin subunit alpha-5
P02469	Mus musculus	confirmed	Laminin subunit beta-1
Q61292	Mus musculus	potential	Laminin subunit beta-2
Q61087	Mus musculus	potential	Laminin subunit beta-3
P02468	Mus musculus	confirmed	Laminin subunit gamma-1
Q61092	Mus musculus	potential	Laminin subunit gamma-2
Q9R0B6	Mus musculus	potential	Laminin subunit gamma-3
Q9JJK6	Mus musculus	potential	L-amino acid oxidase
O09046	Mus musculus	potential	L-amino-acid oxidase
Q99PJ3	Mus musculus	potential	Latent transforming growth factor beta binding protein-1S
O08999	Mus musculus	potential	Latent-transforming growth factor beta-binding protein 2
Q61810	Mus musculus	potential	Latent-transforming growth factor beta-binding protein 3
Q8K4G1	Mus musculus	potential	Latent-transforming growth factor beta-binding protein 4
Q8CG19	Mus musculus	potential	Latent-transforming growth factor beta-binding protein, isoform 1L
Q8CG18	Mus musculus	potential	Latent-transforming growth factor beta-binding protein, isoform 1S
Q80TR1	Mus musculus	potential	Latrophilin-1
Q80TS3	Mus musculus	potential	Latrophilin-3
Q8C351	Mus musculus	potential	Layilin
P29812	Mus musculus	potential	L-dopachrome tautomerase
Q64280	Mus musculus	potential	Left-right determination factor 1
P57785	Mus musculus	by similarity	Left-right determination factor 2
O89017	Mus musculus	by similarity	Legumain
P41160	Mus musculus	potential	Leptin
P48356	Mus musculus	potential	Leptin receptor
Q8BGY3	Mus musculus	potential	Leucine zipper protein 2
Q91XL1	Mus musculus	potential	Leucine-rich alpha-2-glycoprotein
Q9JIA1	Mus musculus	potential	Leucine-rich glioma-inactivated protein 1
Q8BVU0	Mus musculus	potential	Leucine-rich repeat and calponin homology domain-containing protein 3
Q2WF71	Mus musculus	potential	Leucine-rich repeat and fibronectin type III domain-containing protein 1
Q80TG9	Mus musculus	potential	Leucine-rich repeat and fibronectin type-III domain-containing protein 2
Q8BLY3	Mus musculus	potential	Leucine-rich repeat and fibronectin type-III domain-containing protein 3
Q80XU8	Mus musculus	potential	Leucine-rich repeat and fibronectin type-III domain-containing protein 4
Q8BXA0	Mus musculus	potential	Leucine-rich repeat and fibronectin type-III domain-containing protein 5
Q68FM6	Mus musculus	potential	Leucine-rich repeat and fibronectin type-III domain-containing protein 6
Q149C3	Mus musculus	potential	Leucine-rich repeat and immunoglobulin-like domain containing-NOGO receptor-interacting protein 4
Q9D1T0	Mus musculus	potential	Leucine-rich repeat and immunoglobulin-like domain-containing nogo receptor-interacting protein 1
Q3URE9	Mus musculus	potential	Leucine-rich repeat and immunoglobulin-like domain-containing nogo receptor-interacting protein 2
Q6GQU6	Mus musculus	potential	Leucine-rich repeat and immunoglobulin-like domain-containing nogo receptor-interacting protein 3
Q8BXQ3	Mus musculus	potential	Leucine-rich repeat and transmembrane domain-containing protein 1
Q8BGX3	Mus musculus	potential	Leucine-rich repeat and transmembrane domain-containing protein 2
Q8K4Z0	Mus musculus	potential	Leucine-rich repeat LGI family member 2
Q8K406	Mus musculus	potential	Leucine-rich repeat LGI family member 3
Q8K1S1	Mus musculus	potential	Leucine-rich repeat LGI family member 4
Q61809	Mus musculus	by similarity	Leucine-rich repeat neuronal protein 1
Q8CBC6	Mus musculus	potential	Leucine-rich repeat neuronal protein 3
P59383	Mus musculus	potential	Leucine-rich repeat neuronal protein 4
Q8K377	Mus musculus	potential	Leucine-rich repeat transmembrane neuronal protein 1
Q8BGA3	Mus musculus	potential	Leucine-rich repeat transmembrane neuronal protein 2
Q8BZ81	Mus musculus	potential	Leucine-rich repeat transmembrane neuronal protein 3
Q80XG9	Mus musculus	potential	Leucine-rich repeat transmembrane neuronal protein 4
Q8K099	Mus musculus	potential	Leucine-rich repeat, immunoglobulin-like domain and transmembrane domain-containing protein 1
Q6PFC5	Mus musculus	potential	Leucine-rich repeat, immunoglobulin-like domain and transmembrane domain-containing protein 2
Q99PH1	Mus musculus	potential	Leucine-rich repeat-containing 4 protein
A2ARI4	Mus musculus	potential	Leucine-rich repeat-containing G-protein coupled receptor 4
Q9Z1P4	Mus musculus	potential	Leucine-rich repeat-containing G-protein coupled receptor 5
Q3UVD5	Mus musculus	potential	Leucine-rich repeat-containing G-protein coupled receptor 6
Q80X72	Mus musculus	potential	Leucine-rich repeat-containing protein 15
Q9CXD9	Mus musculus	potential	Leucine-rich repeat-containing protein 17
Q8BZT5	Mus musculus	potential	Leucine-rich repeat-containing protein 19
Q8BHA1	Mus musculus	potential	Leucine-rich repeat-containing protein 24
Q8K1T1	Mus musculus	potential	Leucine-rich repeat-containing protein 25
Q91W20	Mus musculus	potential	Leucine-rich repeat-containing protein 26
P59034	Mus musculus	potential	Leucine-rich repeat-containing protein 3
Q8BMT4	Mus musculus	potential	Leucine-rich repeat-containing protein 33
A2VDH3	Mus musculus	potential	Leucine-rich repeat-containing protein 38
Q8VCH9	Mus musculus	potential	Leucine-rich repeat-containing protein 3B
P0C192	Mus musculus	potential	Leucine-rich repeat-containing protein 4B
Q5M8M9	Mus musculus	potential	Leucine-rich repeat-containing protein 52
Q3UY51	Mus musculus	by similarity	Leucine-rich repeat-containing protein 55
Q9DBY4	Mus musculus	potential	Leucine-rich repeat-containing protein KIAA0644
P70193	Mus musculus	potential	Leucine-rich repeats and immunoglobulin-like domains protein 1
Q52KR2	Mus musculus	potential	Leucine-rich repeats and immunoglobulin-like domains protein 2
Q6P1C6	Mus musculus	potential	Leucine-rich repeats and immunoglobulin-like domains protein 3
P09056	Mus musculus	confirmed	Leukemia inhibitory factor
P42703	Mus musculus	potential	Leukemia inhibitory factor receptor
O88803	Mus musculus	by similarity	Leukocyte cell-derived chemotaxin-2
P06800	Mus musculus	confirmed	Leukocyte common antigen
Q3UP87	Mus musculus	potential	Leukocyte elastase
Q64281	Mus musculus	by similarity	Leukocyte immunoglobulin-like receptor subfamily B member 4
Q61735	Mus musculus	potential	Leukocyte surface antigen CD47
P08923	Mus musculus	potential	Leukocyte tyrosine kinase receptor
Q8BG84	Mus musculus	potential	Leukocyte-associated immunoglobulin-like receptor 1
P15702	Mus musculus	confirmed	Leukosialin
Q8BLK3	Mus musculus	by similarity	Limbic system-associated membrane protein
Q8CIV3	Mus musculus	potential	Lipase member H
Q8BM14	Mus musculus	potential	Lipase member K
Q8K2A6	Mus musculus	potential	Lipase member M
Q3U4B4	Mus musculus	potential	Lipase member N
Q99KG5	Mus musculus	potential	Lipolysis-stimulated lipoprotein receptor
Q8BM86	Mus musculus	potential	Lipoma HMGIC fusion partner
Q80SV1	Mus musculus	potential	Lipoma HMGIC fusion partner-like 1 protein
Q61805	Mus musculus	potential	Lipopolysaccharide-binding protein
P11152	Mus musculus	potential	Lipoprotein lipase
P43137	Mus musculus	by similarity	Lithostathine-1
Q08731	Mus musculus	by similarity	Lithostathine-2
Q8VCC2	Mus musculus	by similarity	Liver carboxylesterase 1
Q64176	Mus musculus	by similarity	Liver carboxylesterase 22
Q63880	Mus musculus	by similarity	Liver carboxylesterase 31
Q8VCU1	Mus musculus	potential	Liver carboxylesterase 31-like
P23953	Mus musculus	by similarity	Liver carboxylesterase N
Q91V13	Mus musculus	potential	Liver-expressed antimicrobial peptide 2
Q8K3I0	Mus musculus	potential	Lmb145-cap1-243 protein
Q61114	Mus musculus	potential	Long palate, lung and nasal epithelium carcinoma-associated protein 1
Q80ZU7	Mus musculus	potential	Long palate, lung and nasal epithelium carcinoma-associated protein 3
A2BGH0	Mus musculus	potential	Long palate, lung and nasal epithelium carcinoma-associated protein 4
P08101	Mus musculus	confirmed	Low affinity immunoglobulin gamma Fc region receptor II
P08508	Mus musculus	potential	Low affinity immunoglobulin gamma Fc region receptor III
P35951	Mus musculus	by similarity	Low-density lipoprotein receptor
A2AR95	Mus musculus	potential	Low-density lipoprotein receptor class A domain-containing protein 3
Q7TQH7	Mus musculus	potential	Low-density lipoprotein receptor-related protein 10
Q8CB67	Mus musculus	potential	Low-density lipoprotein receptor-related protein 11
Q8BUJ9	Mus musculus	potential	Low-density lipoprotein receptor-related protein 12
Q9JI18	Mus musculus	potential	Low-density lipoprotein receptor-related protein 1B
A2ARV4	Mus musculus	potential	Low-density lipoprotein receptor-related protein 2
Q8VI56	Mus musculus	potential	Low-density lipoprotein receptor-related protein 4
Q91VN0	Mus musculus	potential	Low-density lipoprotein receptor-related protein 5
O88572	Mus musculus	potential	Low-density lipoprotein receptor-related protein 6
Q924X6	Mus musculus	potential	Low-density lipoprotein receptor-related protein 8
Q3TYX2	Mus musculus	potential	LRRN4 C-terminal-like protein
P18337	Mus musculus	confirmed	L-selectin
P51885	Mus musculus	confirmed	Lumican
Q8CB14	Mus musculus	potential	Lung adenoma susceptibility protein 2
O09108	Mus musculus	by similarity	Lutropin subunit beta
P30730	Mus musculus	by similarity	Lutropin-choriogonadotropic hormone receptor
Q9WVC2	Mus musculus	potential	Ly-6/neurotoxin-like protein 1
Q8BLC3	Mus musculus	potential	Ly6/PLAUR domain-containing protein 1
Q9DD23	Mus musculus	potential	Ly6/PLAUR domain-containing protein 2
Q91YK8	Mus musculus	potential	Ly6/PLAUR domain-containing protein 3
Q8BVP6	Mus musculus	potential	Ly6/PLAUR domain-containing protein 4
Q9D7Z7	Mus musculus	potential	Ly6/PLAUR domain-containing protein 5
Q8BPP5	Mus musculus	by similarity	Ly6/PLAUR domain-containing protein 6
Q9D7F2	Mus musculus	potential	Ly6/PLAUR domain-containing protein 6B
Q8BHC0	Mus musculus	potential	Lymphatic vessel endothelial hyaluronic acid receptor 1
Q61790	Mus musculus	potential	Lymphocyte activation gene 3 protein
Q8K1T4	Mus musculus	potential	Lymphocyte antigen 6 complex locus protein G5b
Q8K1T5	Mus musculus	potential	Lymphocyte antigen 6 complex locus protein G5c
Q9Z1Q4	Mus musculus	potential	Lymphocyte antigen 6 complex locus protein G6c
Q9Z1Q3	Mus musculus	potential	Lymphocyte antigen 6 complex locus protein G6d
P05533	Mus musculus	confirmed	Lymphocyte antigen 6A-2/6E-1
P09568	Mus musculus	confirmed	Lymphocyte antigen 6C2
P35459	Mus musculus	potential	Lymphocyte antigen 6D
Q64253	Mus musculus	potential	Lymphocyte antigen 6E
P35460	Mus musculus	potential	Lymphocyte antigen 6F
P35461	Mus musculus	potential	Lymphocyte antigen 6G
Q9WUC3	Mus musculus	potential	Lymphocyte antigen 6H
Q9WU67	Mus musculus	potential	Lymphocyte antigen 6I
Q9CWP4	Mus musculus	potential	Lymphocyte antigen 6K
Q60767	Mus musculus	confirmed	Lymphocyte antigen 75
O88188	Mus musculus	confirmed	Lymphocyte antigen 86
Q9JHF9	Mus musculus	potential	Lymphocyte antigen 96
P47993	Mus musculus	potential	Lymphotactin
P09225	Mus musculus	confirmed	Lymphotoxin-alpha
Q8BP40	Mus musculus	by similarity	Lysophosphatidic acid phosphatase type 6
Q9Z0M5	Mus musculus	potential	Lysosomal acid lipase/cholesteryl ester hydrolase
P24638	Mus musculus	confirmed	Lysosomal acid phosphatase
P70699	Mus musculus	potential	Lysosomal alpha-glucosidase
O09159	Mus musculus	potential	Lysosomal alpha-mannosidase
P16675	Mus musculus	confirmed	Lysosomal protective protein
Q9JHJ3	Mus musculus	potential	Lysosomal protein NCU-G1
Q7TMR0	Mus musculus	potential	Lysosomal Pro-X carboxypeptidase
O35448	Mus musculus	potential	Lysosomal thioesterase PPT2
P11438	Mus musculus	confirmed	Lysosome-associated membrane glycoprotein 1
P17047	Mus musculus	confirmed	Lysosome-associated membrane glycoprotein 2
Q7TST5	Mus musculus	potential	Lysosome-associated membrane glycoprotein 3
Q9D387	Mus musculus	potential	Lysosome-associated membrane glycoprotein 5
P17897	Mus musculus	by similarity	Lysozyme C-1
P08905	Mus musculus	confirmed	Lysozyme C-2
Q9D7Q0	Mus musculus	potential	Lysozyme g-like protein 1
Q3V1I0	Mus musculus	potential	Lysozyme g-like protein 2
Q9CPX3	Mus musculus	potential	Lysozyme-like protein 1
Q9D925	Mus musculus	potential	Lysozyme-like protein 4
Q9DA11	Mus musculus	potential	Lysozyme-like protein 6
P97873	Mus musculus	potential	Lysyl oxidase homolog 1
P58022	Mus musculus	potential	Lysyl oxidase homolog 2
Q9Z175	Mus musculus	potential	Lysyl oxidase homolog 3
Q924C6	Mus musculus	potential	Lysyl oxidase homolog 4
P07141	Mus musculus	confirmed	Macrophage colony-stimulating factor 1
P09581	Mus musculus	potential	Macrophage colony-stimulating factor 1 receptor
Q61830	Mus musculus	potential	Macrophage mannose receptor 1
P34960	Mus musculus	probable	Macrophage metalloelastase
A1L314	Mus musculus	potential	Macrophage-expressed gene 1 protein
Q62190	Mus musculus	potential	Macrophage-stimulating protein receptor
P31996	Mus musculus	potential	Macrosialin
Q31106	Mus musculus	potential	MAd protein
Q9CQY5	Mus musculus	potential	Magnesium transporter protein 1
Q8HWB0	Mus musculus	potential	Major histocompatibility complex class I-related gene protein
Q31092	Mus musculus	potential	Major histocompatibility complex H-2E alpha chain
O19447	Mus musculus	potential	Major histocompatibility complex H-2E beta chain
O19448	Mus musculus	potential	Major histocompatibility complex H-2E beta chain
P04925	Mus musculus	confirmed	Major prion protein
P11588	Mus musculus	confirmed	Major urinary protein 1
P11589	Mus musculus	confirmed	Major urinary protein 2
P04939	Mus musculus	confirmed	Major urinary protein 3
P11590	Mus musculus	confirmed	Major urinary protein 4
P11591	Mus musculus	confirmed	Major urinary protein 5
P02762	Mus musculus	confirmed	Major urinary protein 6
Q6ZQI3	Mus musculus	potential	Malectin
Q0PMG2	Mus musculus	potential	MAM domain-containing glycosylphosphatidylinositol anchor protein 1
P60755	Mus musculus	potential	MAM domain-containing glycosylphosphatidylinositol anchor protein 2
Q8CG85	Mus musculus	potential	MAM domain-containing protein 2
Q99M71	Mus musculus	potential	Mammalian ependymin-related protein 1
Q91WP0	Mus musculus	by similarity	Mannan-binding lectin serine protease 2
P39039	Mus musculus	by similarity	Mannose-binding protein A
P41317	Mus musculus	by similarity	Mannose-binding protein C
Q9CR33	Mus musculus	potential	MANSC domain-containing protein 1
Q3UU94	Mus musculus	potential	MANSC domain-containing protein ENSP00000370673 homolog
Q95605	Mus musculus	potential	MAp protein
Q31621	Mus musculus	potential	MAq6 protein
Q61832	Mus musculus	potential	MAr protein
Q3TB92	Mus musculus	potential	Mast cell antigen 32
P15089	Mus musculus	confirmed	Mast cell carboxypeptidase A
P11034	Mus musculus	confirmed	Mast cell protease 1
P15119	Mus musculus	confirmed	Mast cell protease 2
P21812	Mus musculus	confirmed	Mast cell protease 4
P43430	Mus musculus	potential	Mast cell protease 8
O35164	Mus musculus	by similarity	Mast cell protease 9
Q00356	Mus musculus	by similarity	Mast cell protease-like protein
Q61450	Mus musculus	confirmed	Mast cell surface glycoprotein Gp49A
Q76LT4	Mus musculus	potential	Mast cell-specific serine protease
P05532	Mus musculus	potential	Mast/stem cell growth factor receptor
O08746	Mus musculus	potential	Matrilin-2
O35701	Mus musculus	confirmed	Matrilin-3
O89029	Mus musculus	potential	Matrilin-4
Q10738	Mus musculus	potential	Matrilysin
Q924I1	Mus musculus	potential	Matrix extracellular phosphoglycoprotein
P19788	Mus musculus	confirmed	Matrix Gla protein
P53690	Mus musculus	potential	Matrix metalloproteinase-14
O54732	Mus musculus	potential	Matrix metalloproteinase-15
Q9WTR0	Mus musculus	potential	Matrix metalloproteinase-16
Q9R0S3	Mus musculus	potential	Matrix metalloproteinase-17
Q9JHI0	Mus musculus	potential	Matrix metalloproteinase-19
P57748	Mus musculus	potential	Matrix metalloproteinase-20
Q8K3F2	Mus musculus	potential	Matrix metalloproteinase-21
Q9R0S2	Mus musculus	potential	Matrix metalloproteinase-24
Q8CGV8	Mus musculus	potential	Matrix metalloproteinase-28
Q8BG29	Mus musculus	potential	Matrix metalloproteinase-28 variant B
P41245	Mus musculus	by similarity	Matrix metalloproteinase-9
Q9DBV4	Mus musculus	potential	Matrix-remodeling-associated protein 8
Q9D2X5	Mus musculus	potential	MAU2 chromatid cohesion factor homolog
Q95606	Mus musculus	potential	MAw5 protein
Q95552	Mus musculus	potential	MB2d protein
P70679	Mus musculus	potential	MB2k1 protein
P70238	Mus musculus	potential	MB2p protein
Q95602	Mus musculus	potential	MB2q4 protein
P70239	Mus musculus	potential	MB2r protein
P70240	Mus musculus	potential	MB2w3 protein
P70241	Mus musculus	potential	MB2w5 protein
Q60696	Mus musculus	potential	Melanocyte protein Pmel 17
Q91ZV0	Mus musculus	potential	Melanoma inhibitory activity protein 2
Q8BI84	Mus musculus	potential	Melanoma inhibitory activity protein 3
Q61865	Mus musculus	potential	Melanoma-derived growth regulatory protein
Q9R0R1	Mus musculus	by similarity	Melanotransferrin
O88174	Mus musculus	potential	Membrane cofactor protein
Q9D3L0	Mus musculus	potential	Membrane protein FAM174A
Q8K064	Mus musculus	potential	Membrane protein FAM174B
Q9WTZ2	Mus musculus	potential	Membrane-bound transcription factor site-1 protease
P28825	Mus musculus	confirmed	Meprin A subunit alpha
Q61847	Mus musculus	potential	Meprin A subunit beta
Q61468	Mus musculus	potential	Mesothelin
Q8C160	Mus musculus	potential	Mesothelin-like protein
P97772	Mus musculus	potential	Metabotropic glutamate receptor 1
Q14BI2	Mus musculus	potential	Metabotropic glutamate receptor 2
Q9QYS2	Mus musculus	potential	Metabotropic glutamate receptor 3
Q68EF4	Mus musculus	potential	Metabotropic glutamate receptor 4
Q3UVX5	Mus musculus	potential	Metabotropic glutamate receptor 5
Q5NCH9	Mus musculus	potential	Metabotropic glutamate receptor 6
Q68ED2	Mus musculus	potential	Metabotropic glutamate receptor 7
P47743	Mus musculus	potential	Metabotropic glutamate receptor 8
P12032	Mus musculus	confirmed	Metalloproteinase inhibitor 1
P25785	Mus musculus	confirmed	Metalloproteinase inhibitor 2
P39876	Mus musculus	potential	Metalloproteinase inhibitor 3
Q9JHB3	Mus musculus	potential	Metalloproteinase inhibitor 4
Q6Y4S4	Mus musculus	potential	Metastasis-suppressor KiSS-1
Q8C1Q4	Mus musculus	potential	Meteorin
Q8VE43	Mus musculus	potential	Meteorin-like protein
Q9DD20	Mus musculus	potential	Methyltransferase-like protein 7B
Q9EPL4	Mus musculus	potential	Methyltransferase-like protein 9
Q6QMF4	Mus musculus	potential	MHC class I antigen
Q6QMF3	Mus musculus	potential	MHC class I antigen
Q6QMF2	Mus musculus	potential	MHC class I antigen
Q31129	Mus musculus	potential	MHC class I cell surface glycoprotein
Q31150	Mus musculus	potential	MHC class II alpha chain
Q31622	Mus musculus	potential	MHC class II antigen
Q31128	Mus musculus	potential	MHC class II antigen
Q31630	Mus musculus	potential	MHC class II antigen
Q31631	Mus musculus	potential	MHC class II antigen
Q9TP17	Mus musculus	potential	MHC class II antigen beta chain
Q9TP15	Mus musculus	potential	MHC class II antigen beta chain
Q31104	Mus musculus	confirmed	MHC class II E-beta
Q31103	Mus musculus	confirmed	MHC class II E-beta
Q31163	Mus musculus	potential	MHC class II E-beta-k
Q31135	Mus musculus	potential	MHC class II H2-IA-beta chain
Q31169	Mus musculus	potential	MHC H-2Dr protein
Q31170	Mus musculus	potential	MHC H-2Dr protein
Q31166	Mus musculus	confirmed	MHC integral membrane protein M3
Q922T2	Mus musculus	potential	Microfibril-associated glycoprotein 3
Q9D1H9	Mus musculus	potential	Microfibril-associated glycoprotein 4
P55002	Mus musculus	potential	Microfibrillar-associated protein 2
Q9D3X9	Mus musculus	potential	Microfibrillar-associated protein 3-like
Q9QZJ6	Mus musculus	potential	Microfibrillar-associated protein 5
O08601	Mus musculus	potential	Microsomal triglyceride transfer protein large subunit
P12025	Mus musculus	potential	Midkine
Q62000	Mus musculus	potential	Mimecan
P10404	Mus musculus	potential	MLV-related proviral Env polyprotein
Q9EQY5	Mus musculus	potential	MMAN-g protein
Q80W56	Mus musculus	potential	Mono(ADP-ribosyl)transferase
P10810	Mus musculus	confirmed	Monocyte differentiation antigen CD14
Q61896	Mus musculus	potential	MRNA,
Q61902	Mus musculus	potential	Msg3 protein
Q8VHF2	Mus musculus	potential	Mucin and cadherin-like protein
Q61002	Mus musculus	potential	Mucin apoprotein
Q02496	Mus musculus	confirmed	Mucin-1
P19467	Mus musculus	potential	Mucin-13
Q8C6Z1	Mus musculus	potential	Mucin-15
Q6PZE0	Mus musculus	potential	Mucin-19
Q8BUE7	Mus musculus	potential	Mucin-20
Q8JZM8	Mus musculus	potential	Mucin-4
Q80T03	Mus musculus	potential	Mucin-6
Q61826	Mus musculus	potential	Mucosal addressin cell adhesion molecule 1
Q8R1M8	Mus musculus	potential	Mucosal pentraxin
P27106	Mus musculus	potential	Muellerian-inhibiting factor
Q8K5B2	Mus musculus	potential	Multiple coagulation factor deficiency protein 2 homolog
Q6DIB5	Mus musculus	potential	Multiple epidermal growth factor-like domains 10
Q80T91	Mus musculus	potential	Multiple epidermal growth factor-like domains 11
Q80V70	Mus musculus	potential	Multiple epidermal growth factor-like domains 6
P60882	Mus musculus	potential	Multiple epidermal growth factor-like domains 8
Q8BH27	Mus musculus	potential	Multiple epidermal growth factor-like domains 9
Q9Z2L6	Mus musculus	potential	Multiple inositol polyphosphate phosphatase 1
P28665	Mus musculus	confirmed	Murinoglobulin-1
P28666	Mus musculus	by similarity	Murinoglobulin-2
Q6IE29	Mus musculus	potential	Murinoglubulin-4
Q54AJ5	Mus musculus	potential	MuSC
Q61006	Mus musculus	potential	Muscle, skeletal receptor tyrosine protein kinase
P27573	Mus musculus	by similarity	Myelin P0 protein
Q3TEW6	Mus musculus	potential	Myelin protein zero-like protein 1
O70255	Mus musculus	potential	Myelin protein zero-like protein 2
Q3V3F6	Mus musculus	by similarity	Myelin protein zero-like protein 3
P20917	Mus musculus	confirmed	Myelin-associated glycoprotein
Q61885	Mus musculus	confirmed	Myelin-oligodendrocyte glycoprotein
Q61096	Mus musculus	by similarity	Myeloblastin
Q63994	Mus musculus	potential	Myeloid cell surface antigen CD33
P11247	Mus musculus	confirmed	Myeloperoxidase
Q6RFG4	Mus musculus	potential	Myeloperoxidase
O70624	Mus musculus	potential	Myocilin
Q540E2	Mus musculus	potential	Myostatin
Q64191	Mus musculus	potential	N(4)-(beta-N-acetylglucosaminyl)-L-asparaginase
A0N8K9	Mus musculus	potential	n/a
A2IPW9	Mus musculus	potential	n/a
A2NV20	Mus musculus	potential	n/a
A0N8N6	Mus musculus	potential	n/a
B1B213	Mus musculus	potential	n/a
A0N8R0	Mus musculus	potential	n/a
A0N275	Mus musculus	potential	n/a
B2ZEZ5	Mus musculus	potential	n/a
A2MZG6	Mus musculus	potential	n/a
A0N1R6	Mus musculus	potential	n/a
A0N8R1	Mus musculus	potential	n/a
A0N8M6	Mus musculus	potential	n/a
A3RLQ7	Mus musculus	potential	n/a
A2NC20	Mus musculus	potential	n/a
A0N8K0	Mus musculus	potential	n/a
A2NU50	Mus musculus	potential	n/a
A2NU20	Mus musculus	potential	n/a
A0N8J4	Mus musculus	potential	n/a
A0N1D5	Mus musculus	potential	n/a
A2NU21	Mus musculus	potential	n/a
B2ZEZ6	Mus musculus	potential	n/a
A2NV19	Mus musculus	potential	n/a
A2NU49	Mus musculus	potential	n/a
A2NTS3	Mus musculus	potential	n/a
A0N8Q8	Mus musculus	potential	n/a
A2NU19	Mus musculus	potential	n/a
A2KFE9	Mus musculus	potential	n/a
A2N1N0	Mus musculus	potential	n/a
A0N1R4	Mus musculus	potential	n/a
A0N8I8	Mus musculus	potential	n/a
A2NTY6	Mus musculus	potential	n/a
B1B212	Mus musculus	potential	n/a
A2NU22	Mus musculus	potential	n/a
A2N1N1	Mus musculus	potential	n/a
A0N8X1	Mus musculus	potential	n/a
A0N274	Mus musculus	potential	n/a
A2NTU7	Mus musculus	potential	n/a
A0N8M7	Mus musculus	potential	n/a
A0N1R5	Mus musculus	potential	n/a
Q571E4	Mus musculus	by similarity	N-acetylgalactosamine-6-sulfatase
Q8BJ48	Mus musculus	potential	N-acetylglucosamine-1-phosphodiester alpha-N-acetylglucosaminidase
Q6S5C2	Mus musculus	potential	N-acetylglucosamine-1-phosphotransferase subunit gamma
Q8BFR4	Mus musculus	potential	N-acetylglucosamine-6-sulfatase
Q8VCS0	Mus musculus	confirmed	N-acetylmuramoyl-L-alanine amidase
Q9D7V9	Mus musculus	potential	N-acylethanolamine-hydrolyzing acid amidase
O09043	Mus musculus	potential	Napsin-A
Q8BHG1	Mus musculus	potential	Nardilysin
P40753	Mus musculus	by similarity	Natriuretic peptides B
Q8C567	Mus musculus	potential	Natural cytotoxicity triggering receptor 1
Q07763	Mus musculus	potential	Natural killer cell receptor 2B4
Q9EQS9	Mus musculus	potential	Neighbor of punc e11
P97798	Mus musculus	potential	Neogenin
Q9QZS7	Mus musculus	potential	Nephrin
Q91V88	Mus musculus	potential	Nephronectin
P70211	Mus musculus	potential	Netrin receptor DCC
Q8K1S4	Mus musculus	potential	Netrin receptor UNC5A
Q8K1S3	Mus musculus	potential	Netrin receptor UNC5B
O08747	Mus musculus	potential	Netrin receptor UNC5C
Q8K1S2	Mus musculus	potential	Netrin receptor UNC5D
O09118	Mus musculus	potential	Netrin-1
Q3UQ22	Mus musculus	potential	Netrin-1-like protein
Q9R1A3	Mus musculus	potential	Netrin-2-like protein
Q9JI33	Mus musculus	potential	Netrin-4
Q8R4G0	Mus musculus	potential	Netrin-G1
Q8C031	Mus musculus	potential	Netrin-G1 ligand
Q8R4F1	Mus musculus	potential	Netrin-G2
Q9CQ45	Mus musculus	potential	Neudesin
P13595	Mus musculus	confirmed	Neural cell adhesion molecule 1
O35136	Mus musculus	potential	Neural cell adhesion molecule 2
P11627	Mus musculus	confirmed	Neural cell adhesion molecule L1
P70232	Mus musculus	potential	Neural cell adhesion molecule L1-like protein
Q64322	Mus musculus	potential	Neural proliferation differentiation and control protein 1
Q9CS84	Mus musculus	potential	Neurexin-1-alpha
Q61200	Mus musculus	potential	Neurexophilin-1
Q61199	Mus musculus	potential	Neurexophilin-2
Q91VX5	Mus musculus	potential	Neurexophilin-3
Q8CFV4	Mus musculus	potential	Neuritin
Q8C4W3	Mus musculus	potential	Neuritin-like protein
Q61477	Mus musculus	potential	Neuroblastoma suppressor of tumorigenicity 1
P55066	Mus musculus	potential	Neurocan core protein
P63239	Mus musculus	potential	Neuroendocrine convertase 1
P21661	Mus musculus	potential	Neuroendocrine convertase 2
P12961	Mus musculus	confirmed	Neuroendocrine protein 7B2
Q810U3	Mus musculus	potential	Neurofascin
Q01705	Mus musculus	potential	Neurogenic locus notch homolog protein 1
O35516	Mus musculus	potential	Neurogenic locus notch homolog protein 2
Q61982	Mus musculus	potential	Neurogenic locus notch homolog protein 3
P31695	Mus musculus	potential	Neurogenic locus notch homolog protein 4
Q99K10	Mus musculus	potential	Neuroligin-1
Q69ZK9	Mus musculus	by similarity	Neuroligin-2
Q8BYM5	Mus musculus	potential	Neuroligin-3
Q9CR53	Mus musculus	by similarity	Neuromedin-B
Q5H8A1	Mus musculus	potential	Neuromedin-S
Q9QXK8	Mus musculus	potential	Neuromedin-U
Q91X60	Mus musculus	potential	Neuronal acetylcholine receptor subunit alpha-2
Q8R4G9	Mus musculus	potential	Neuronal acetylcholine receptor subunit alpha-3
O70174	Mus musculus	potential	Neuronal acetylcholine receptor subunit alpha-4
Q2MKA5	Mus musculus	potential	Neuronal acetylcholine receptor subunit alpha-5
Q9R0W9	Mus musculus	by similarity	Neuronal acetylcholine receptor subunit alpha-6
P49582	Mus musculus	by similarity	Neuronal acetylcholine receptor subunit alpha-7
Q9ERK7	Mus musculus	potential	Neuronal acetylcholine receptor subunit beta-2
Q8BMN3	Mus musculus	potential	Neuronal acetylcholine receptor subunit beta-3
Q8R493	Mus musculus	potential	Neuronal acetylcholine receptor subunit beta-4
Q810U4	Mus musculus	potential	Neuronal cell adhesion molecule
Q80Z24	Mus musculus	by similarity	Neuronal growth regulator 1
Q62443	Mus musculus	potential	Neuronal pentraxin-1
O70340	Mus musculus	potential	Neuronal pentraxin-2
Q6RUU0	Mus musculus	potential	Neuronal pentraxin-like protein C16orf38 homolog
Q8K4P1	Mus musculus	potential	Neuropeptide B
[truncated: 1,165 more rows]
[truncated: 4 more columns]

## Sheet: Sheet3
Accession Number	Organism	SP Status	Protein Name	Proprotein Cleavage	Glycosylation	Transmembrane	conservation
Q5JWF8	Homo sapiens	potential	Putative uncharacterized actin family protein C20orf134	4
Q9UJ94	Homo sapiens	potential	Putative uncharacterized C21orf104 protein	1
Q5T292	Homo sapiens	potential	Putative uncharacterized protein C10orf128			1	y
Q8N7Q2	Homo sapiens	potential	Putative uncharacterized protein C10orf31	2
Q6UWK7	Homo sapiens	potential	Putative uncharacterized protein C10orf99		1
Q8TAV5	Homo sapiens	potential	Putative uncharacterized protein C11orf45		1
Q96I85	Homo sapiens	potential	Putative uncharacterized protein C14orf144
Q96LR1	Homo sapiens	potential	Putative uncharacterized protein C17orf69	1	1
Q5TEV5	Homo sapiens	potential	Putative uncharacterized protein C1orf134	1	1
Q7Z2R9	Homo sapiens	potential	Putative uncharacterized protein C1orf191		1
Q9Y569	Homo sapiens	potential	Putative uncharacterized protein DKFZp434I1916
A8MTW9	Homo sapiens	potential	Putative uncharacterized protein ENSP00000380674	1
A8MUN3	Homo sapiens	potential	Putative uncharacterized protein ENSP00000381830	1
Q9H7B7	Homo sapiens	potential	Putative uncharacterized protein FLJ21075	2
Q6ZVS6	Homo sapiens	potential	Putative uncharacterized protein FLJ42147	2
Q6ZRU5	Homo sapiens	potential	Putative uncharacterized protein FLJ46089	1
Q71RG6	Homo sapiens	potential	Putative uncharacterized protein FP248	1
Q8N2X6	Homo sapiens	potential	Putative uncharacterized protein LOC116349	1	1
Q8TAT8	Homo sapiens	potential	Putative uncharacterized protein LOC644613	2
P59088	Homo sapiens	potential	Putative uncharacterized protein MCM3APAS	1		1
Q9P1C3	Homo sapiens	potential	Putative uncharacterized protein PRO2829	3
Q6UWF6	Homo sapiens	potential	Putative uncharacterized protein UNQ3029/PRO9830		1
Q6UY13	Homo sapiens	potential	Putative uncharacterized protein UNQ5830/PRO19650/PRO19816		1
Q6UXQ6	Homo sapiens	potential	Putative uncharacterized protein UNQ6125/PRO20090		1
Q6UXQ8	Homo sapiens	potential	Putative uncharacterized protein UNQ6190/PRO20217	2
Q6UXU1	Homo sapiens	potential	Putative uncharacterized protein UNQ6490/PRO21339	1
Q6UXR6	Homo sapiens	potential	Putative uncharacterized protein UNQ6494/PRO21346	2
Q6UXP8	Homo sapiens	potential	Putative uncharacterized protein UNQ6975/PRO21958	3
Q6UXU0	Homo sapiens	potential	Putative uncharacterized protein UNQ9165/PRO28630		1
Q86TW2	Homo sapiens	potential	Uncharacterized aarF domain-containing protein kinase 1	5			y
Q9D0L4	Mus musculus	potential	Uncharacterized aarF domain-containing protein kinase 1	5			y
Q5NDL2	Homo sapiens	potential	Uncharacterized glycosyltransferase AER61	5	1		Y
Q8NAT1	Homo sapiens	potential	Uncharacterized glycosyltransferase AGO61	2	2		Y
Q5T742	Homo sapiens	potential	Uncharacterized protein C10orf25		1
Q8IW00	Homo sapiens	potential	Uncharacterized protein C10orf72	3	1	1	Y
Q96F05	Homo sapiens	potential	Uncharacterized protein C11orf24		1	1	Y
Q9D8N1	Mus musculus	potential	Uncharacterized protein C11orf24 homolog		2	1	y
Q8N8P7	Homo sapiens	potential	Uncharacterized protein C11orf44
Q6UW78	Homo sapiens	confirmed	Uncharacterized protein C11orf83	1
Q6NUJ2	Homo sapiens	potential	Uncharacterized protein C11orf87			1
Q32M26	Mus musculus	potential	Uncharacterized protein C11orf87 homolog		2	1
Q96LU7	Homo sapiens	potential	Uncharacterized protein C12orf28	1	2		Y
Q8IYJ0	Homo sapiens	potential	Uncharacterized protein C12orf53			1	Y
Q6P1B3	Mus musculus	potential	Uncharacterized protein C12orf53 homolog	1		1
Q4KMG9	Homo sapiens	potential	Uncharacterized protein C12orf59			1	Y
Q0VBF2	Mus musculus	potential	Uncharacterized protein C12orf59 homolog			1	y
Q69YU5	Homo sapiens	potential	Uncharacterized protein C12orf73			1	Y
Q8BTC1	Mus musculus	potential	Uncharacterized protein C12orf73 homolog	1			y
Q86TY3	Homo sapiens	potential	Uncharacterized protein C14orf37		2	1	Y
Q8BT18	Mus musculus	potential	Uncharacterized protein C14orf37 homolog	3	1	1	y
Q9H972	Homo sapiens	potential	Uncharacterized protein C14orf93	2			Y
Q8K2W9	Mus musculus	potential	Uncharacterized protein C14orf93 homolog	3			y
Q0VG49	Mus musculus	potential	Uncharacterized protein C15orf61 homolog	1			y
Q6UX73	Homo sapiens	potential	Uncharacterized protein C16orf89	2			Y
Q3UST5	Mus musculus	potential	Uncharacterized protein C16orf89 homolog	1
Q0P5P2	Homo sapiens	potential	Uncharacterized protein C17orf67	1			Y
Q3V3I5	Mus musculus	potential	Uncharacterized protein C17orf67 homolog	1			y
Q96MU5	Homo sapiens	potential	Uncharacterized protein C17orf77		1
Q6UX52	Homo sapiens	confirmed	Uncharacterized protein C17orf99	1	2
Q9CX63	Mus musculus	potential	Uncharacterized protein C17orf99 homolog	1	2
Q7Z4B0	Homo sapiens	potential	Uncharacterized protein C18orf20	1	1
Q8NEA5	Homo sapiens	potential	Uncharacterized protein C19orf18	1		1	Y
Q1ZYL8	Homo sapiens	potential	Uncharacterized protein C19orf36		2
Q5SY80	Homo sapiens	potential	Uncharacterized protein C1orf101	3	3	1	Y
Q96HA4	Homo sapiens	potential	Uncharacterized protein C1orf159		3	1
Q8NBI3	Homo sapiens	confirmed	Uncharacterized protein C1orf187		1
Q8WWF1	Homo sapiens	potential	Uncharacterized protein C1orf54
Q8R2K8	Mus musculus	potential	Uncharacterized protein C1orf54 homolog		1		y
Q9BUN1	Homo sapiens	potential	Uncharacterized protein C1orf56
Q569E4	Mus musculus	potential	Uncharacterized protein C1orf56 homolog	3
Q80WW9	Mus musculus	potential	Uncharacterized protein C20orf116 homolog	2	2
P58658	Homo sapiens	potential	Uncharacterized protein C21orf63	4	2	1	y
P58659	Mus musculus	potential	Uncharacterized protein C21orf63 homolog	4	3	1	y
Q6UXQ4	Homo sapiens	potential	Uncharacterized protein C2orf66	1			y
Q9CYS6	Mus musculus	potential	Uncharacterized protein C2orf72 homolog	3
Q6UX34	Homo sapiens	potential	Uncharacterized protein C2orf82			1	y
Q9CXL7	Mus musculus	potential	Uncharacterized protein C2orf82 homolog			1	y
Q17RF5	Homo sapiens	potential	Uncharacterized protein C4orf26
Q0P651	Homo sapiens	potential	Uncharacterized protein C4orf29	2	2		y
Q8C1A9	Mus musculus	potential	Uncharacterized protein C4orf29 homolog	3	1
Q6MZM9	Homo sapiens	potential	Uncharacterized protein C4orf40				y
Q6UWT4	Homo sapiens	potential	Uncharacterized protein C5orf46				y
Q3V2D2	Mus musculus	potential	Uncharacterized protein C5orf46 homolog				y
Q86T20	Homo sapiens	potential	Uncharacterized protein C6orf1	1			y
Q8R043	Mus musculus	potential	Uncharacterized protein C6orf1 homolog	1
Q6UXA7	Homo sapiens	potential	Uncharacterized protein C6orf15
Q5TF21	Homo sapiens	potential	Uncharacterized protein C6orf174	5		1	y
Q6NZL0	Mus musculus	potential	Uncharacterized protein C6orf174 homolog	7		1
Q6P5S2	Homo sapiens	potential	Uncharacterized protein C6orf58	2		2	y
Q8C6C9	Mus musculus	potential	Uncharacterized protein C6orf58 homolog		1		y
Q9NU53	Homo sapiens	potential	Uncharacterized protein C6orf72		4	1	y
Q91WR6	Mus musculus	potential	Uncharacterized protein C6orf72 homolog	2	3	1	y
Q96L11	Homo sapiens	potential	Uncharacterized protein C7orf34
Q9D9P8	Mus musculus	potential	Uncharacterized protein C7orf34 homolog
A4D0V7	Homo sapiens	potential	Uncharacterized protein C7orf58
Q6ZRZ4	Homo sapiens	potential	Uncharacterized protein C9orf47	2
NP_001180551	Homo sapiens	potential	Uncharacterized protein ENSP00000244321			1
Q9CQD7	Mus musculus	potential	Uncharacterized protein ENSP00000244321 homolog	2
Q3V0X1	Mus musculus	potential	Uncharacterized protein ENSP00000358542 homolog	1		1
Q8N1Y9	Homo sapiens	potential	Uncharacterized protein FLJ37218			1
Q2M2E5	Homo sapiens	potential	Uncharacterized protein FLJ37543
P0C876	Homo sapiens	potential	Uncharacterized protein FLJ90687				y
Q8N766	Homo sapiens	potential	Uncharacterized protein KIAA0090	7	1	1
Q8C7X2	Mus musculus	potential	Uncharacterized protein KIAA0090	5		1	y
Q92537	Homo sapiens	potential	Uncharacterized protein KIAA0247			1
NP_055873	Homo sapiens	potential	Uncharacterized protein KIAA0564	13
Q8CC88	Mus musculus	potential	Uncharacterized protein KIAA0564 homolog	13
Q3SXP7	Homo sapiens	potential	Uncharacterized protein KIAA1644		2	1
Q0VBP7	Mus musculus	potential	Uncharacterized protein KIAA1644		2	1
Q8IYS2	Homo sapiens	potential	Uncharacterized protein KIAA2013	4	1	1	y
Q91X21	Mus musculus	potential	Uncharacterized protein KIAA2013	4	1	1	y
NP_848906	Mus musculus	potential	uncharacterized protein LOC320736	3		1	y
Q5JRM2	Homo sapiens	potential	Uncharacterized protein LOC347487		1	1	y
Q9H9K5	Homo sapiens	potential	Uncharacterized protein LP9056	2	2	1
Q6UX82	Homo sapiens	potential	Uncharacterized protein UNQ511/PRO1026	1	7		y
Q9D7S0	Mus musculus	potential	Uncharacterized protein UNQ511/PRO1026 homolog		13		y
Q6UXV3	Homo sapiens	potential	Uncharacterized protein UNQ6126/PRO20091
Q5VUM1	Homo sapiens	potential	UPF0369 protein C6orf57	3			y
Q8BTE0	Mus musculus	potential	UPF0369 protein C6orf57 homolog	3			y
Q14667	Homo sapiens	potential	UPF0378 protein KIAA0100	23	1		y
Q5SYL3	Mus musculus	potential	UPF0378 protein KIAA0100	23			y
Q8N2U0	Homo sapiens	potential	UPF0451 protein C17orf61			1	y
Q5F285	Mus musculus	potential	UPF0451 protein C17orf61 homolog	1		2	y
Q9H741	Homo sapiens	potential	UPF0454 protein C12orf49		1		y
Q8BTG6	Mus musculus	potential	UPF0454 protein C12orf49 homolog	1	1		y
Q9NPA0	Homo sapiens	potential	UPF0480 protein C15orf24	1		1	y
Q9EP72	Mus musculus	potential	UPF0480 protein C15orf24 homolog			1	y
Q5UCC4	Homo sapiens	potential	UPF0510 protein INM02	1	1	2	y
Q3TAS6	Mus musculus	potential	UPF0510 protein INM02	1		2	y
Q3TNH5	Mus musculus	potential	UPF0528 protein FAM172A	6	1		y
Q969H8	Homo sapiens	potential	UPF0556 protein C19orf10				y
Q9CPT4	Mus musculus	potential	UPF0556 protein C19orf10 homolog				y
Q8N8R5	Homo sapiens	potential	UPF0565 protein C2orf69	1	3		y
Q9D9H8	Mus musculus	potential	UPF0565 protein C2orf69 homolog	3	2		y
Q6UXG2	Homo sapiens	potential	UPF0577 protein KIAA1324		3	1	y
NP_001028476	Mus musculus	potential	UPF0577 protein KIAA1324			4	y
NP_001136221	Homo sapiens	potential	UPF0577 protein KIAA1324-like	5		2	y
Q3UZV7	Mus musculus	potential	UPF0577 protein KIAA1324-like homolog	5	3	1	y
Q9BQ49	Homo sapiens	potential	UPF0608 protein C19orf42	1		1	y
Q5RKS2	Mus musculus	potential	UPF0608 protein C19orf42 homolog	1		1
Q5JXM2	Homo sapiens	potential	UPF0624 protein C6orf186	3
Q8CCB5	Mus musculus	potential	UPF0624 protein C6orf186 homolog	7			y
NP_001181915	Homo sapiens	potential	UPF0632 protein A	4		1	y
NP_001079018	Mus musculus	potential	UPF0632 protein A	7		1	y
Q86V40	Homo sapiens	potential	UPF0632 protein B	8	4	1
Q7Z4R8	Homo sapiens	potential	UPF0669 protein C6orf120		1		y
Q9DAY5	Mus musculus	potential	UPF0669 protein C6orf120 homolog		1
Q8WUY1	Homo sapiens	potential	UPF0670 protein C8orf55	1			y
Q80ZW2	Mus musculus	potential	UPF0670 protein C8orf55 homolog	3	1		y
Q8NDZ4	Homo sapiens	potential	UPF0672 protein C3orf58	8			y
Q3USZ8	Mus musculus	potential	UPF0672 protein C3orf58 homolog	7			y
Q9H7Y0	Homo sapiens	potential	UPF0672 protein CXorf36	5	1
Q8C3I9	Mus musculus	potential	UPF0672 protein CXorf36 homolog	4	2		y
Q8K2T4	Mus musculus	by similarity	UPF0723 protein C11orf83 homolog	2			y

## Sheet: Sheet4
Accession Number	Organism	SP Status	Protein Name	Proprotein Cleavage	Glycosylation	Transmembrane	conservation
Q5T292	Homo sapiens	potential	Putative uncharacterized protein C10orf128			1	y
Q86TW2	Homo sapiens	potential	Uncharacterized aarF domain-containing protein kinase 1	5			y
Q9D0L4	Mus musculus	potential	Uncharacterized aarF domain-containing protein kinase 1	5			y
Q5NDL2	Homo sapiens	potential	Uncharacterized glycosyltransferase AER61	5	1		Y
Q8NAT1	Homo sapiens	potential	Uncharacterized glycosyltransferase AGO61	2	2		Y
Q8IW00	Homo sapiens	potential	Uncharacterized protein C10orf72	3	1	1	Y
Q96F05	Homo sapiens	potential	Uncharacterized protein C11orf24		1	1	Y
Q9D8N1	Mus musculus	potential	Uncharacterized protein C11orf24 homolog		2	1	y
Q96LU7	Homo sapiens	potential	Uncharacterized protein C12orf28	1	2		Y
Q8IYJ0	Homo sapiens	potential	Uncharacterized protein C12orf53			1	Y
Q4KMG9	Homo sapiens	potential	Uncharacterized protein C12orf59			1	Y
Q0VBF2	Mus musculus	potential	Uncharacterized protein C12orf59 homolog			1	y
Q69YU5	Homo sapiens	potential	Uncharacterized protein C12orf73			1	Y
Q8BTC1	Mus musculus	potential	Uncharacterized protein C12orf73 homolog	1			y
Q86TY3	Homo sapiens	potential	Uncharacterized protein C14orf37		2	1	Y
Q8BT18	Mus musculus	potential	Uncharacterized protein C14orf37 homolog	3	1	1	y
Q9H972	Homo sapiens	potential	Uncharacterized protein C14orf93	2			Y
Q8K2W9	Mus musculus	potential	Uncharacterized protein C14orf93 homolog	3			y
Q0VG49	Mus musculus	potential	Uncharacterized protein C15orf61 homolog	1			y
Q6UX73	Homo sapiens	potential	Uncharacterized protein C16orf89	2			Y
Q0P5P2	Homo sapiens	potential	Uncharacterized protein C17orf67	1			Y
Q3V3I5	Mus musculus	potential	Uncharacterized protein C17orf67 homolog	1			y
Q8NEA5	Homo sapiens	potential	Uncharacterized protein C19orf18	1		1	Y
Q5SY80	Homo sapiens	potential	Uncharacterized protein C1orf101	3	3	1	Y
Q8R2K8	Mus musculus	potential	Uncharacterized protein C1orf54 homolog		1		y
P58658	Homo sapiens	potential	Uncharacterized protein C21orf63	4	2	1	y
P58659	Mus musculus	potential	Uncharacterized protein C21orf63 homolog	4	3	1	y
Q6UXQ4	Homo sapiens	potential	Uncharacterized protein C2orf66	1			y
Q6UX34	Homo sapiens	potential	Uncharacterized protein C2orf82			1	y
Q9CXL7	Mus musculus	potential	Uncharacterized protein C2orf82 homolog			1	y
Q0P651	Homo sapiens	potential	Uncharacterized protein C4orf29	2	2		y
Q6MZM9	Homo sapiens	potential	Uncharacterized protein C4orf40				y
Q6UWT4	Homo sapiens	potential	Uncharacterized protein C5orf46				y
Q3V2D2	Mus musculus	potential	Uncharacterized protein C5orf46 homolog				y
Q86T20	Homo sapiens	potential	Uncharacterized protein C6orf1	1			y
Q5TF21	Homo sapiens	potential	Uncharacterized protein C6orf174	5		1	y
Q6P5S2	Homo sapiens	potential	Uncharacterized protein C6orf58	2		2	y
Q8C6C9	Mus musculus	potential	Uncharacterized protein C6orf58 homolog		1		y
Q9NU53	Homo sapiens	potential	Uncharacterized protein C6orf72		4	1	y
Q91WR6	Mus musculus	potential	Uncharacterized protein C6orf72 homolog	2	3	1	y
P0C876	Homo sapiens	potential	Uncharacterized protein FLJ90687				y
Q8C7X2	Mus musculus	potential	Uncharacterized protein KIAA0090	5		1	y
Q8IYS2	Homo sapiens	potential	Uncharacterized protein KIAA2013	4	1	1	y
Q91X21	Mus musculus	potential	Uncharacterized protein KIAA2013	4	1	1	y
NP_848906	Mus musculus	potential	uncharacterized protein LOC320736	3		1	y
Q5JRM2	Homo sapiens	potential	Uncharacterized protein LOC347487		1	1	y
Q6UX82	Homo sapiens	potential	Uncharacterized protein UNQ511/PRO1026	1	7		y
Q9D7S0	Mus musculus	potential	Uncharacterized protein UNQ511/PRO1026 homolog		13		y
Q5VUM1	Homo sapiens	potential	UPF0369 protein C6orf57	3			y
Q8BTE0	Mus musculus	potential	UPF0369 protein C6orf57 homolog	3			y
Q14667	Homo sapiens	potential	UPF0378 protein KIAA0100	23	1		y
Q5SYL3	Mus musculus	potential	UPF0378 protein KIAA0100	23			y
Q8N2U0	Homo sapiens	potential	UPF0451 protein C17orf61			1	y
Q5F285	Mus musculus	potential	UPF0451 protein C17orf61 homolog	1		2	y
Q9H741	Homo sapiens	potential	UPF0454 protein C12orf49		1		y
Q8BTG6	Mus musculus	potential	UPF0454 protein C12orf49 homolog	1	1		y
Q9NPA0	Homo sapiens	potential	UPF0480 protein C15orf24	1		1	y
Q9EP72	Mus musculus	potential	UPF0480 protein C15orf24 homolog			1	y
Q5UCC4	Homo sapiens	potential	UPF0510 protein INM02	1	1	2	y
Q3TAS6	Mus musculus	potential	UPF0510 protein INM02	1		2	y
Q3TNH5	Mus musculus	potential	UPF0528 protein FAM172A	6	1		y
Q969H8	Homo sapiens	potential	UPF0556 protein C19orf10				y
Q9CPT4	Mus musculus	potential	UPF0556 protein C19orf10 homolog				y
Q8N8R5	Homo sapiens	potential	UPF0565 protein C2orf69	1	3		y
Q9D9H8	Mus musculus	potential	UPF0565 protein C2orf69 homolog	3	2		y
Q6UXG2	Homo sapiens	potential	UPF0577 protein KIAA1324		3	1	y
NP_001028476	Mus musculus	potential	UPF0577 protein KIAA1324			4	y
NP_001136221	Homo sapiens	potential	UPF0577 protein KIAA1324-like	5		2	y
Q3UZV7	Mus musculus	potential	UPF0577 protein KIAA1324-like homolog	5	3	2	y
Q9BQ49	Homo sapiens	potential	UPF0608 protein C19orf42	1		1	y
Q8CCB5	Mus musculus	potential	UPF0624 protein C6orf186 homolog	7			y
NP_001181915	Homo sapiens	potential	UPF0632 protein A	4		1	y
NP_001079018	Mus musculus	potential	UPF0632 protein A	7		1	y
Q7Z4R8	Homo sapiens	potential	UPF0669 protein C6orf120		1		y
Q8WUY1	Homo sapiens	potential	UPF0670 protein C8orf55	1			y
Q80ZW2	Mus musculus	potential	UPF0670 protein C8orf55 homolog	3	1		y
Q8NDZ4	Homo sapiens	potential	UPF0672 protein C3orf58	8			y
Q3USZ8	Mus musculus	potential	UPF0672 protein C3orf58 homolog	7			y
Q8C3I9	Mus musculus	potential	UPF0672 protein CXorf36 homolog	4	2		y
Q8K2T4	Mus musculus	by similarity	UPF0723 protein C11orf83 homolog	2			y

## Sheet: Sheet5
Accession Number	Organism	SP Status	Protein Name	Proprotein Cleavage	Glycosylation	Transmembrane	conservation	domain
Q86TW2	Homo sapiens	potential	Uncharacterized aarF domain-containing protein kinase 1	5		0	y	Protein Kinases, catalytic domain
Q9D0L4	Mus musculus	potential	Uncharacterized aarF domain-containing protein kinase 1	5		0	y	Protein Kinases, catalytic domain
Q5NDL2	Homo sapiens	potential	Uncharacterized glycosyltransferase AER61	5	1	0	Y
Q8NAT1	Homo sapiens	potential	Uncharacterized glycosyltransferase AGO61	2	2	0	Y
Q96LU7	Homo sapiens	potential	Uncharacterized protein C12orf28	1	2	0	Y	Myelin gene regulatory factor C-terminal domain 2
Q8BTC1	Mus musculus	potential	Uncharacterized protein C12orf73 homolog	1		0	y
Q9H972	Homo sapiens	potential	Uncharacterized protein C14orf93	5		0	Y
Q8K2W9	Mus musculus	potential	Uncharacterized protein C14orf93 homolog	4		0	y
Q0VG49	Mus musculus	potential	Uncharacterized protein C15orf61 homolog	1		0	y
Q6UX73	Homo sapiens	potential	Uncharacterized protein C16orf89	2		0	Y	Putative binding domain
Q0P5P2	Homo sapiens	potential	Uncharacterized protein C17orf67	1		0	Y
Q3V3I5	Mus musculus	potential	Uncharacterized protein C17orf67 homolog	1		0	y
Q8R2K8	Mus musculus	potential	Uncharacterized protein C1orf54 homolog		1	0	y
Q6UXQ4	Homo sapiens	potential	Uncharacterized protein C2orf66	1		0	y
Q0P651	Homo sapiens	potential	Uncharacterized protein C4orf29	5	2	0	y	Esterase_lipase
Q6MZM9	Homo sapiens	potential	Uncharacterized protein C4orf40			0	y	Compositionally biased Ala rich region
Q6UWT4	Homo sapiens	potential	Uncharacterized protein C5orf46			0	y
Q3V2D2	Mus musculus	potential	Uncharacterized protein C5orf46 homolog			0	y
Q86T20	Homo sapiens	potential	Uncharacterized protein C6orf1	1		0	y	fatty oxidation complex, alpha subunit
Q8C6C9	Mus musculus	potential	Uncharacterized protein C6orf58 homolog		1	0	y
P0C876	Homo sapiens	potential	Uncharacterized protein FLJ90687	1		0	y
Q6UX82	Homo sapiens	potential	Uncharacterized protein UNQ511/PRO1026	1	7	0	y
Q9D7S0	Mus musculus	potential	Uncharacterized protein UNQ511/PRO1026 homolog		13	0	y
Q5VUM1	Homo sapiens	potential	UPF0369 protein C6orf57	3		0	y
Q8BTE0	Mus musculus	potential	UPF0369 protein C6orf57 homolog	3		0	y
Q14667	Homo sapiens	potential	UPF0378 protein KIAA0100	23	1	0	y	Mitochondrial protein from FMP27, RNA pol II promoter Fmp27 protein domain, Golgi-body localisation protein domain
Q5SYL3	Mus musculus	potential	UPF0378 protein KIAA0100	23		0	y
Q9H741	Homo sapiens	potential	UPF0454 protein C12orf49	1	1	0	y	Compositionally biased region
Q8BTG6	Mus musculus	potential	UPF0454 protein C12orf49 homolog	1	1	0	y	Compositionally biased region
Q3TNH5	Mus musculus	potential	UPF0528 protein FAM172A	6	1	0	y	Arb2 domain
Q969H8	Homo sapiens	potential	UPF0556 protein C19orf10			0	y	Interleukin-25
Q9CPT4	Mus musculus	potential	UPF0556 protein C19orf10 homolog			0	y
Q8N8R5	Homo sapiens	potential	UPF0565 protein C2orf69	1	3	0	y
Q9D9H8	Mus musculus	potential	UPF0565 protein C2orf69 homolog	3	2	0	y
Q8CCB5	Mus musculus	potential	UPF0624 protein C6orf186 homolog	6		0	y	AdoMet_MTases
Q7Z4R8	Homo sapiens	potential	UPF0669 protein C6orf120		1	0	y
Q8WUY1	Homo sapiens	potential	UPF0670 protein C8orf55	1		0	y	4HBT
Q80ZW2	Mus musculus	potential	UPF0670 protein C8orf55 homolog	3	1	0	y	4HBT
Q8NDZ4	Homo sapiens	potential	UPF0672 protein C3orf58	8		0	y
Q3USZ8	Mus musculus	potential	UPF0672 protein C3orf58 homolog	8		0	y
Q8C3I9	Mus musculus	potential	UPF0672 protein CXorf36 homolog	4	2	0	y
Q8K2T4	Mus musculus	by similarity	UPF0723 protein C11orf83 homolog	2		0	y
Q8IW00	Homo sapiens	potential	Uncharacterized protein C10orf72	3	1	1	Y
Q8BT18	Mus musculus	potential	Uncharacterized protein C14orf37 homolog	3	1	1	y
Q8NEA5	Homo sapiens	potential	Uncharacterized protein C19orf18	1		1	Y
Q5TF21	Homo sapiens	potential	Uncharacterized protein C6orf174	5		1	y	Compositionally biased region, chromosome segregation protein SMC
Q8C7X2	Mus musculus	potential	Uncharacterized protein KIAA0090	8		1	y	PQQ-like domain
Q8IYS2	Homo sapiens	potential	Uncharacterized protein KIAA2013	5	1	1	y
Q91X21	Mus musculus	potential	Uncharacterized protein KIAA2013	6	1	1	y
NP_848906	Mus musculus	potential	uncharacterized protein LOC320736	3	1	1	y
Q9NPA0	Homo sapiens	potential	UPF0480 protein C15orf24	1		1	y	Peptidase associated domain
Q9BQ49	Homo sapiens	potential	UPF0608 protein C19orf42	1		1	y
NP_001181915	Homo sapiens	potential	UPF0632 protein A	4		1	y	TraB family
NP_001079018	Mus musculus	potential	UPF0632 protein A	5		1	y	TraB family
